# Supplementary material for: Contribution of Transcription Factor Binding Site Motif Variants to Condition-Specific Gene Expression Patterns in Budding Yeast
Source: PLOS journal article supplement (doi:10.1371/journal.pone.0032274), 2012-02-23

**Figure S1. Comparison of average gene expression levels between genes with different functional variants of transcription factor binding site motifs in *S. cerevisiae* (Affymetrix)**

Mean expression levels for target genes of functional variants found at positions in TF binding sites of *S. cerevisiae* using expression data from 211 Affymetrix S98 arrays and a variety of experimental conditions. Even if more than two variants exist at a position, only two are shown in each individual graph, and additional graphs show the pairwise comparison between each variant present at each position. The means are ordered across conditions according to the difference between mean expression of the two variants. Vertical lines extending from each point indicate the standard deviation of the mean. Horizontal black bars indicate the difference between the mean ranks. The significance of the functional heterogeneity was determined without reference to the segregation of experimental conditions, which are shown according to color along the x-axis. The number of targets for each variant graphed are shown at the bottom right hand of the graph.

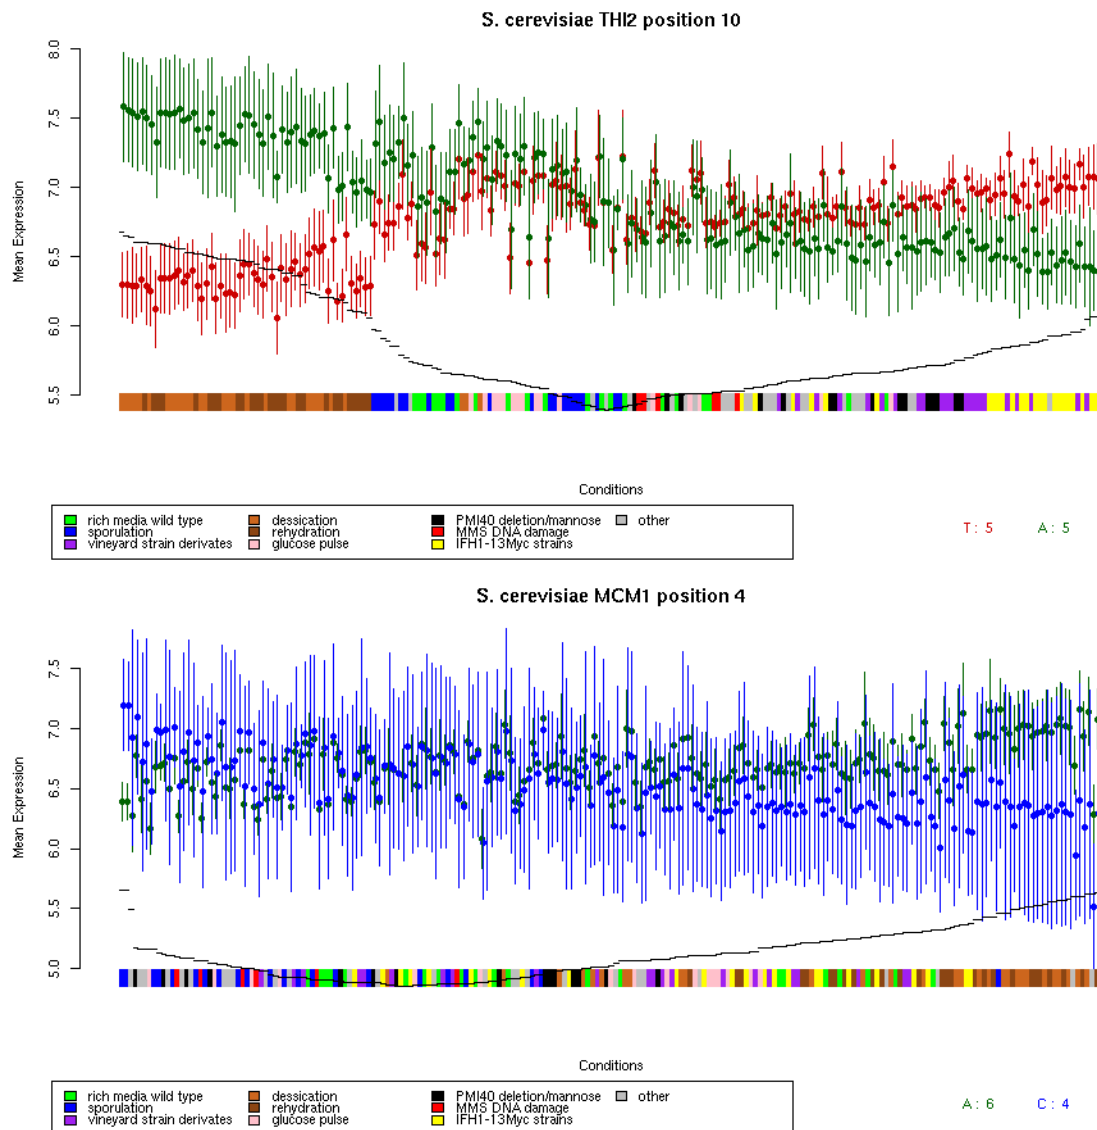

**S. cerevisiae MCM1 position 4**

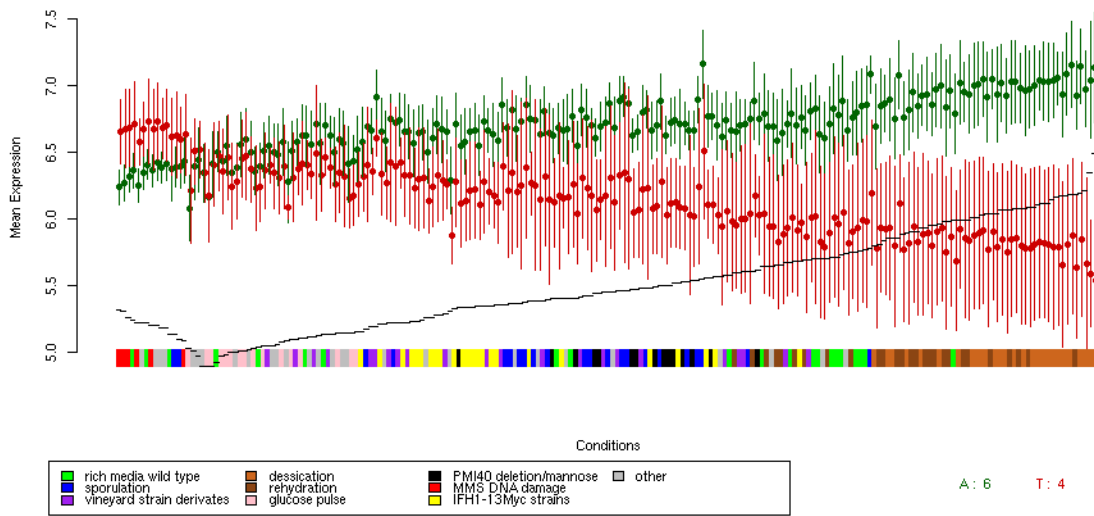

**S. cerevisiae MCM1 position 4**

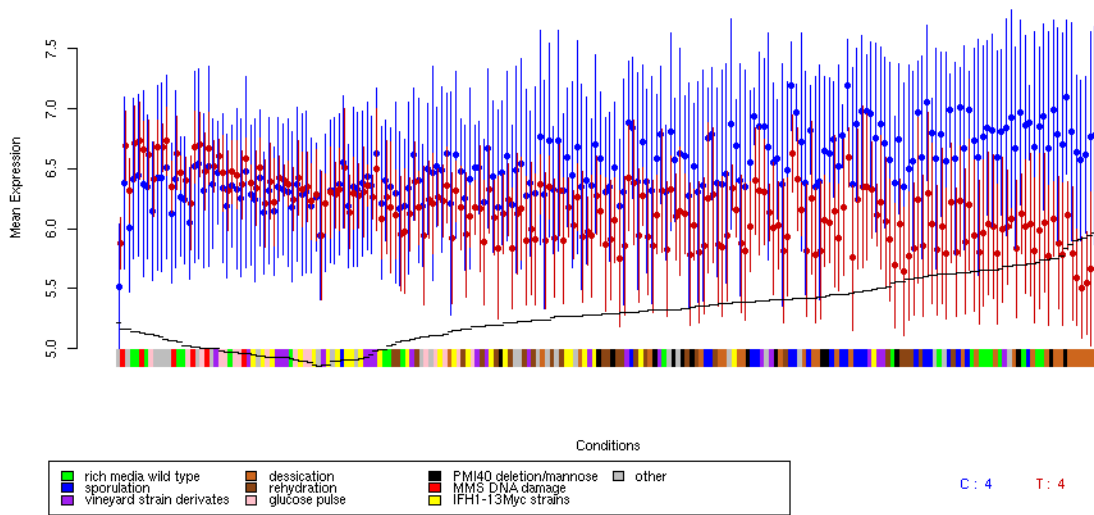

**S. cerevisiae REB1 position 2**

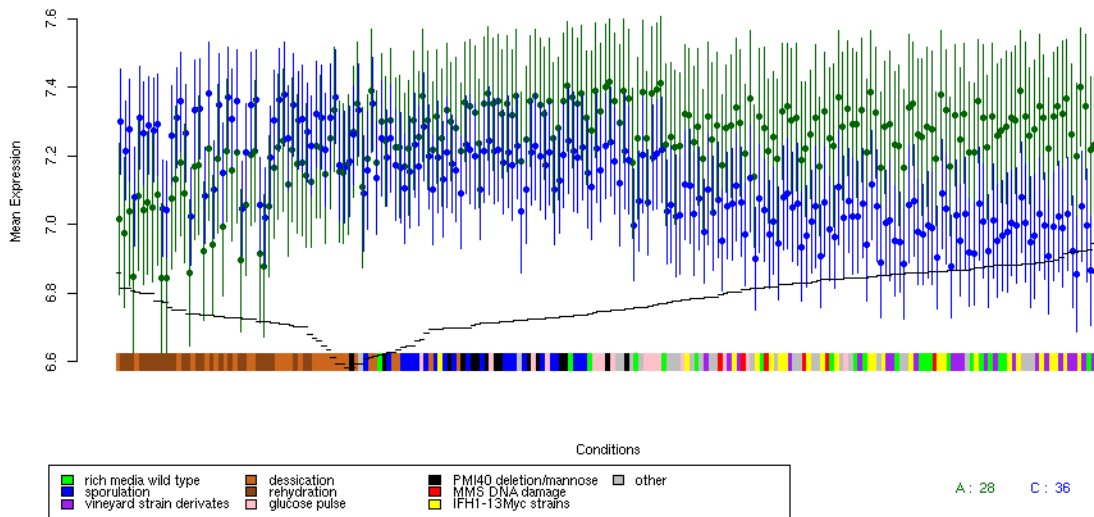

**S. cerevisiae REB1 position 2**

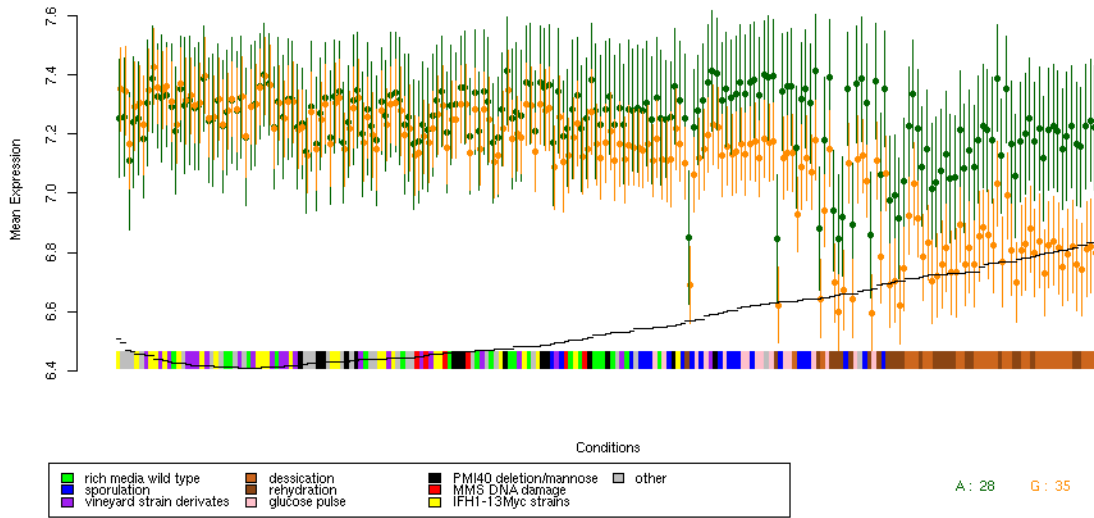

**S. cerevisiae REB1 position 2**

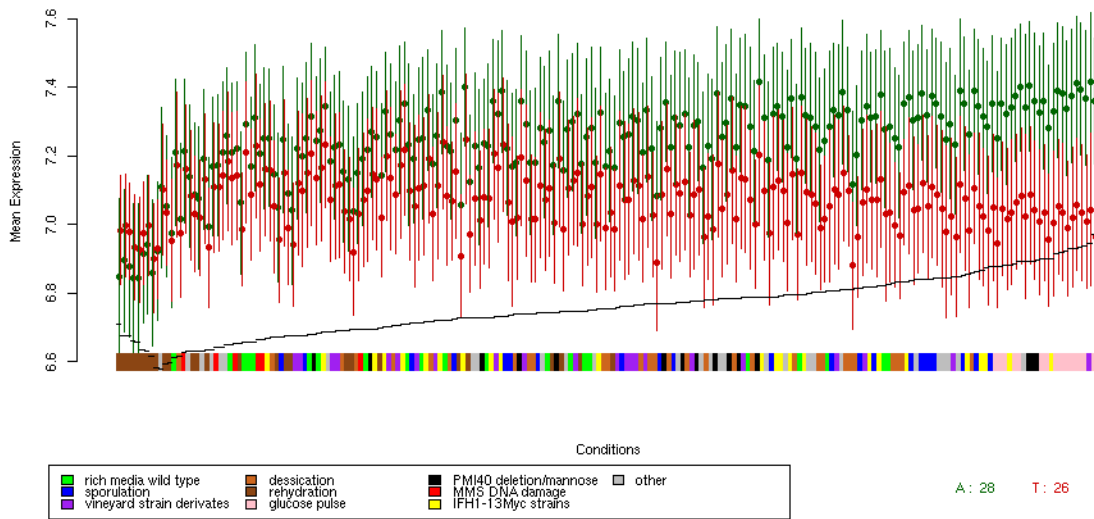

**S. cerevisiae REB1 position 2**

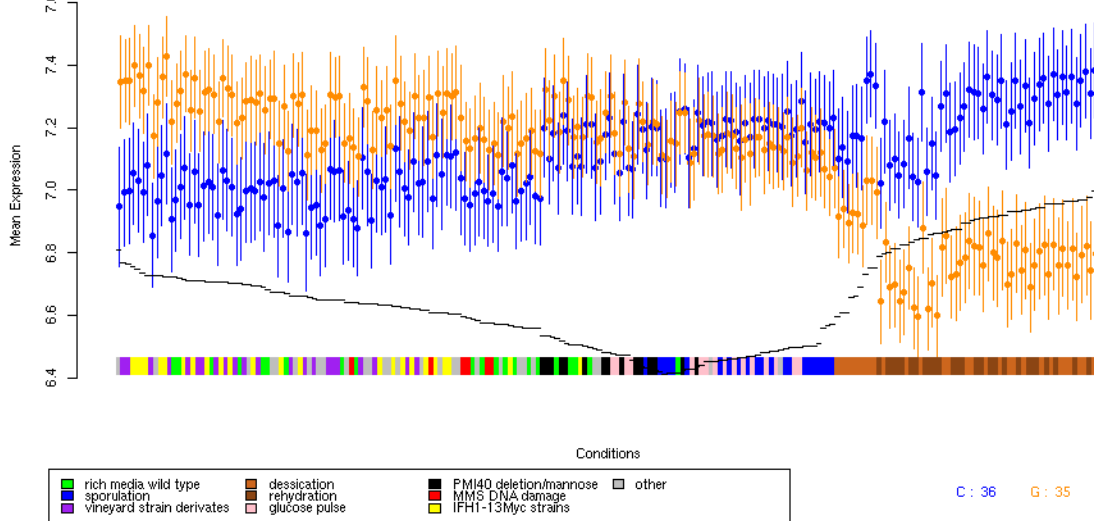

*S. cerevisiae* REB1 position 2

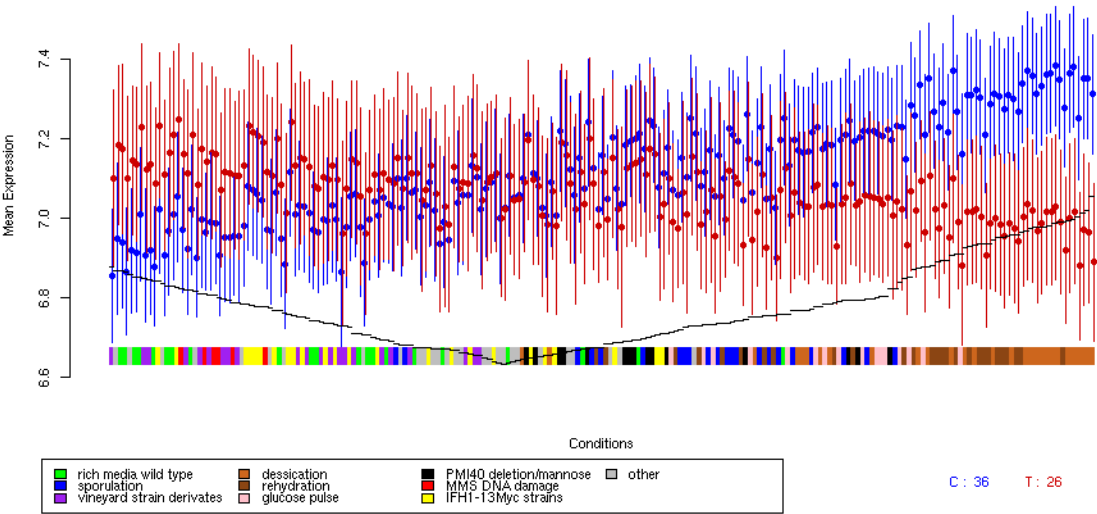

*S. cerevisiae* REB1 position 2

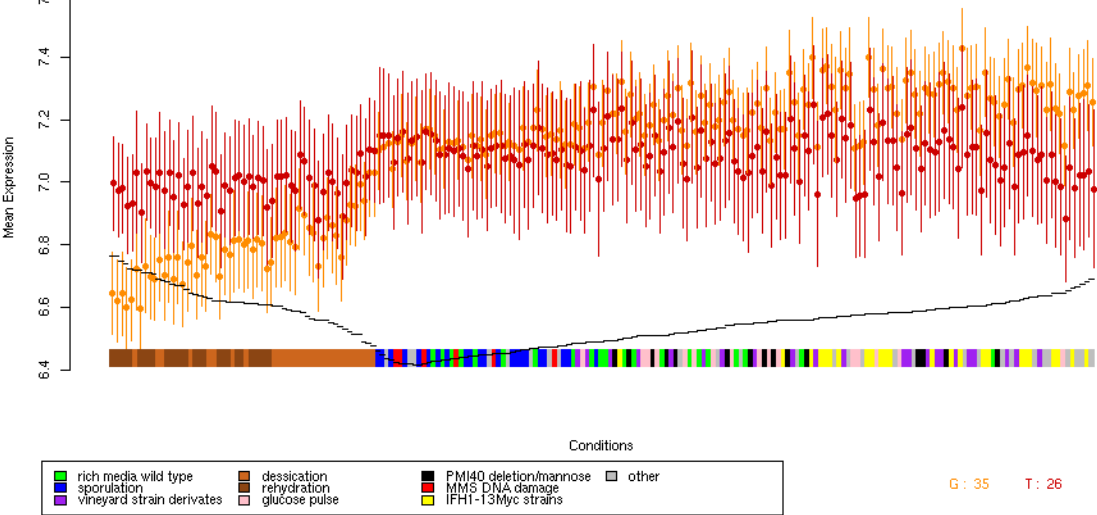

*S. cerevisiae* STE12DIG1 position 7

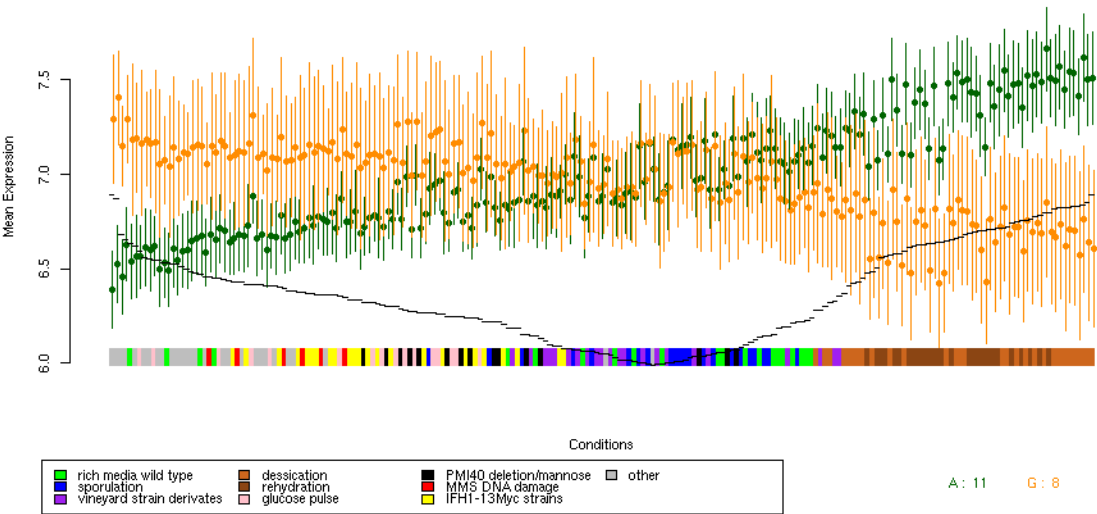

***S. cerevisiae* STE12DIG1 position 7**

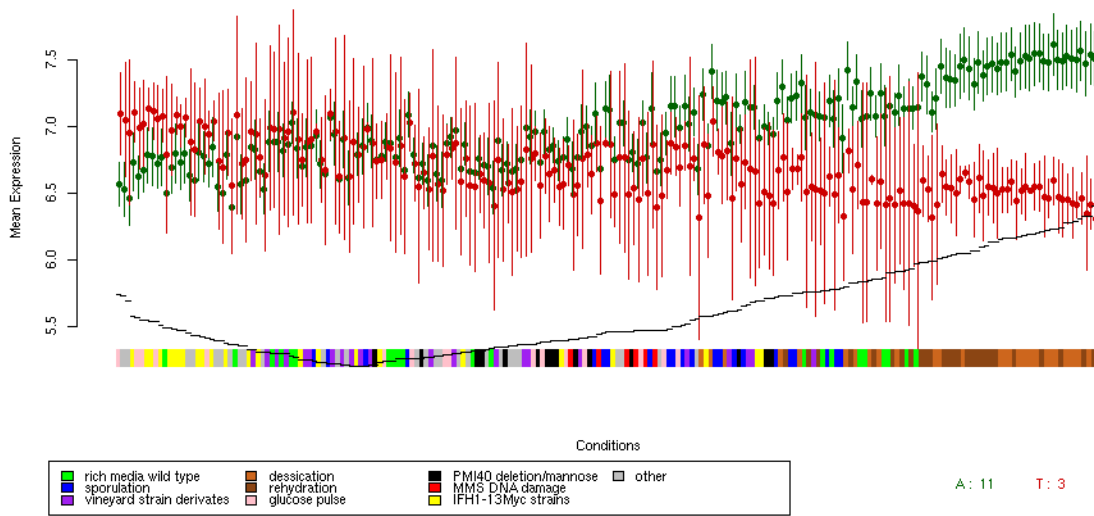

***S. cerevisiae* STE12DIG1 position 7**

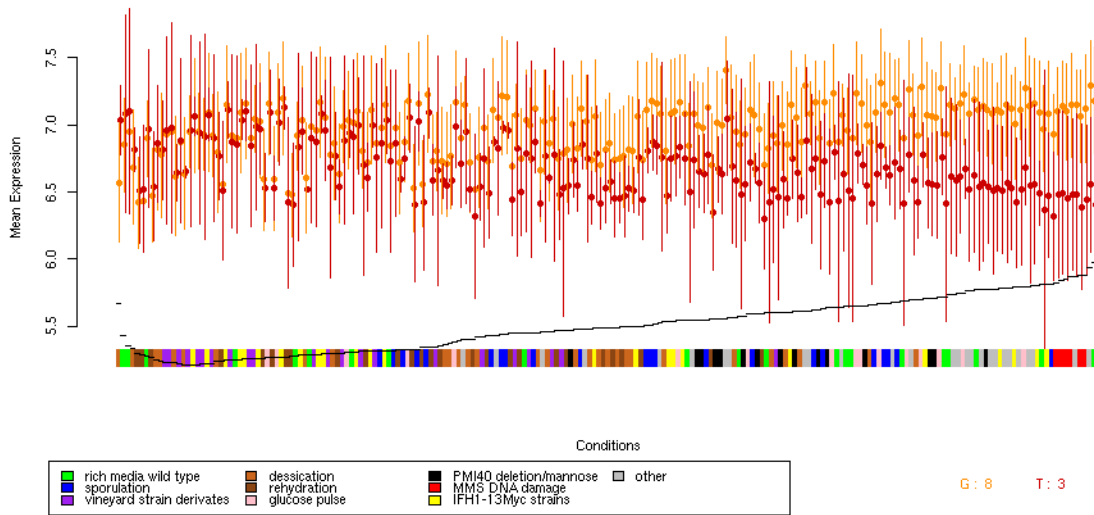

***S. cerevisiae* SUM1 position 7**

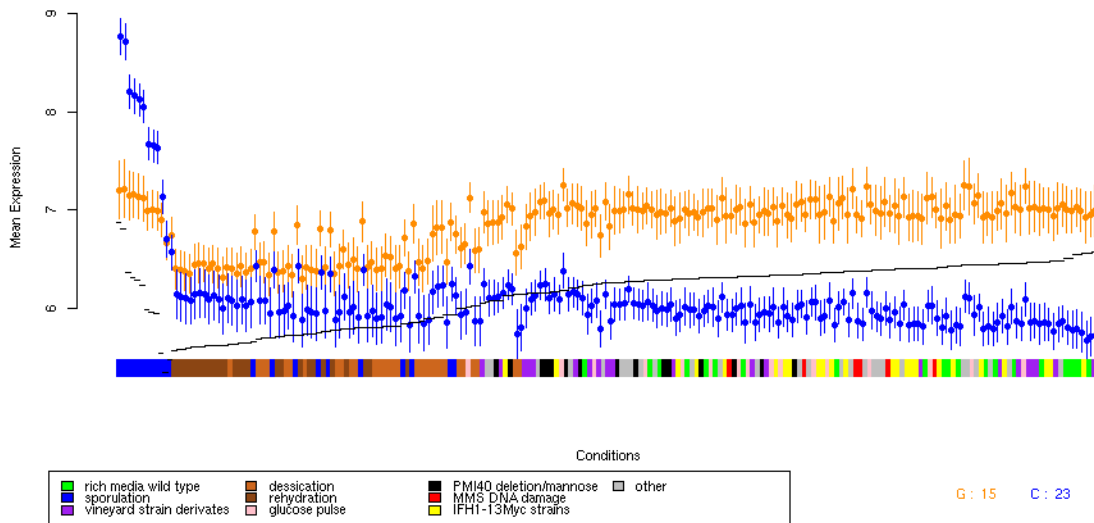

S. cerevisiae YOX1 position 5

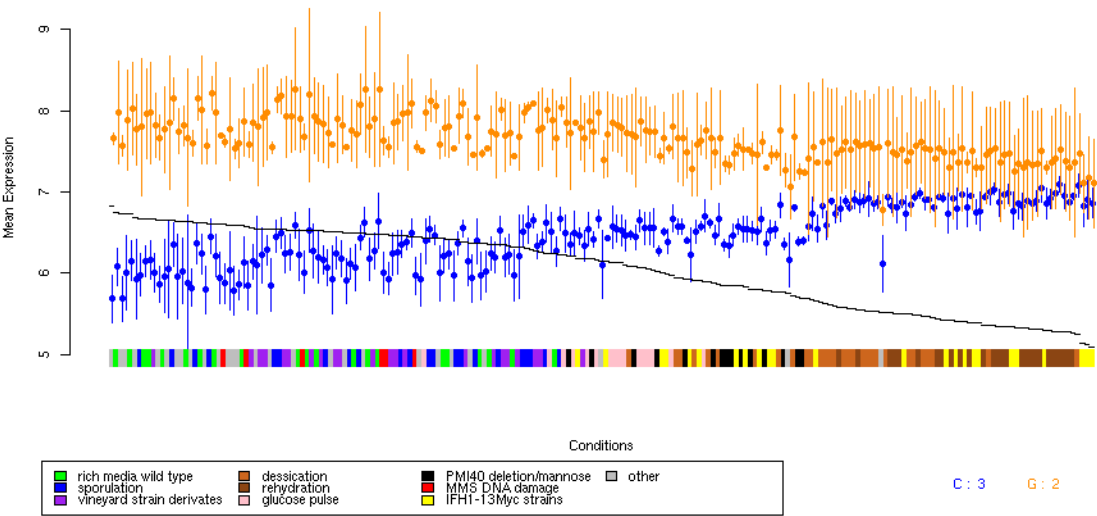

S. cerevisiae ABF1 position 8

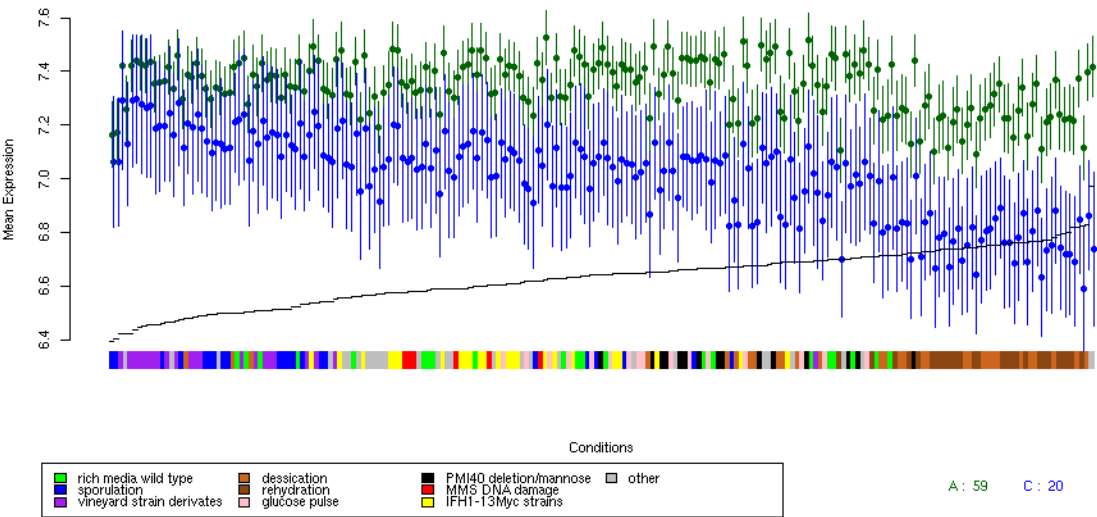

S. cerevisiae ABF1 position 8

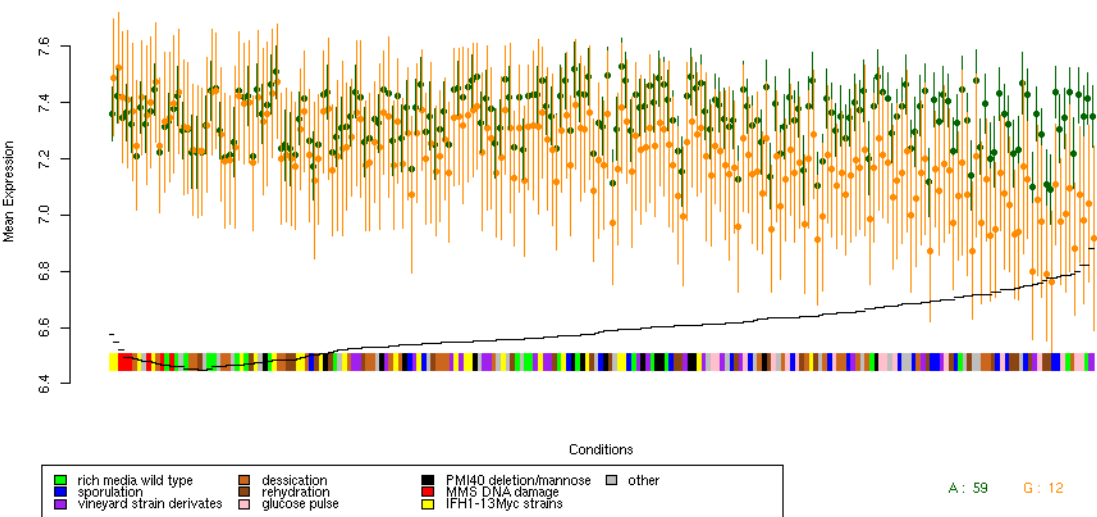

**S. cerevisiae ABF1 position 8**

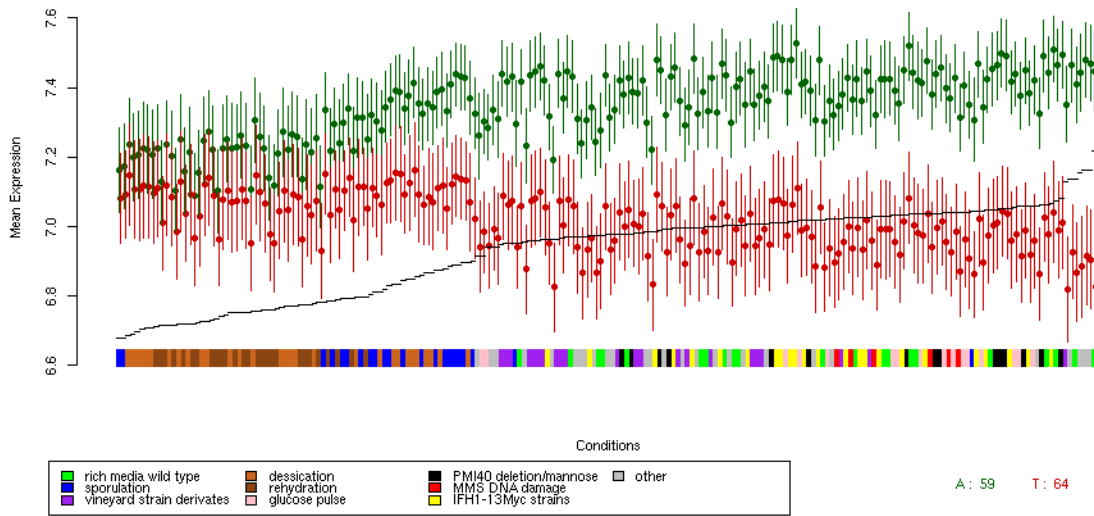

**S. cerevisiae ABF1 position 8**

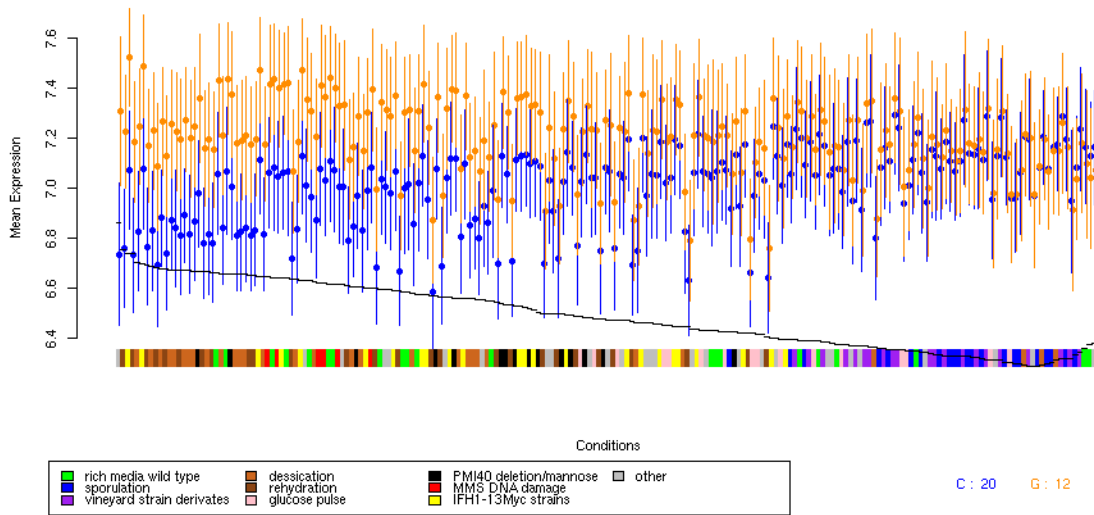

**S. cerevisiae ABF1 position 8**

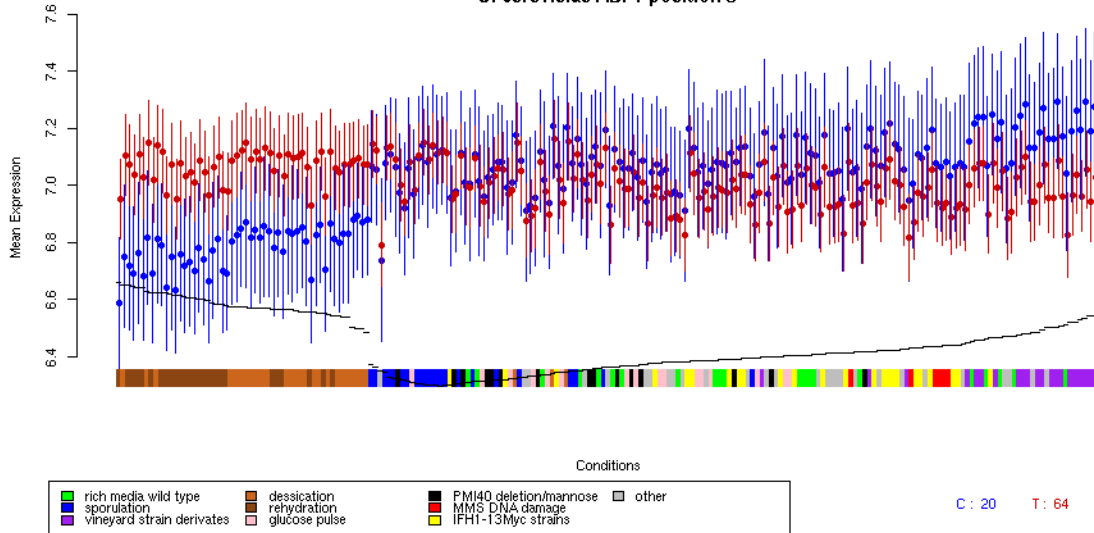

### S. cerevisiae ABF1 position 8

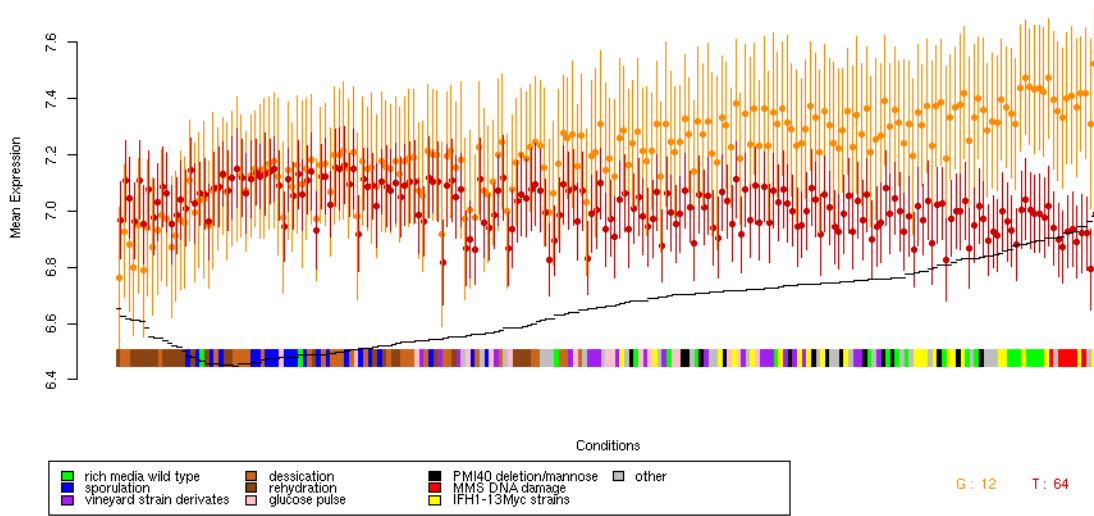

### S. cerevisiae doublePAC position 1

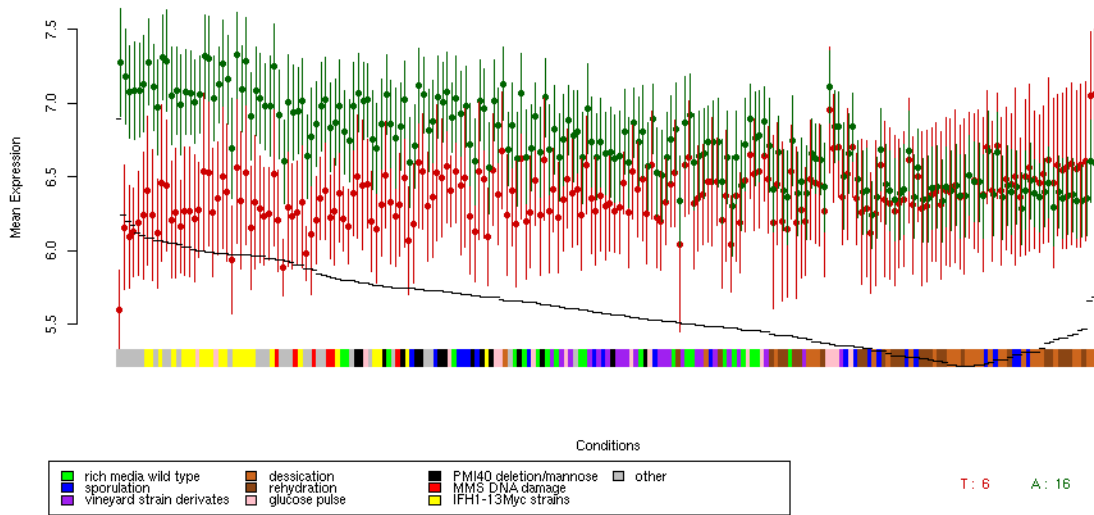

### S. cerevisiae doublePAC position 11

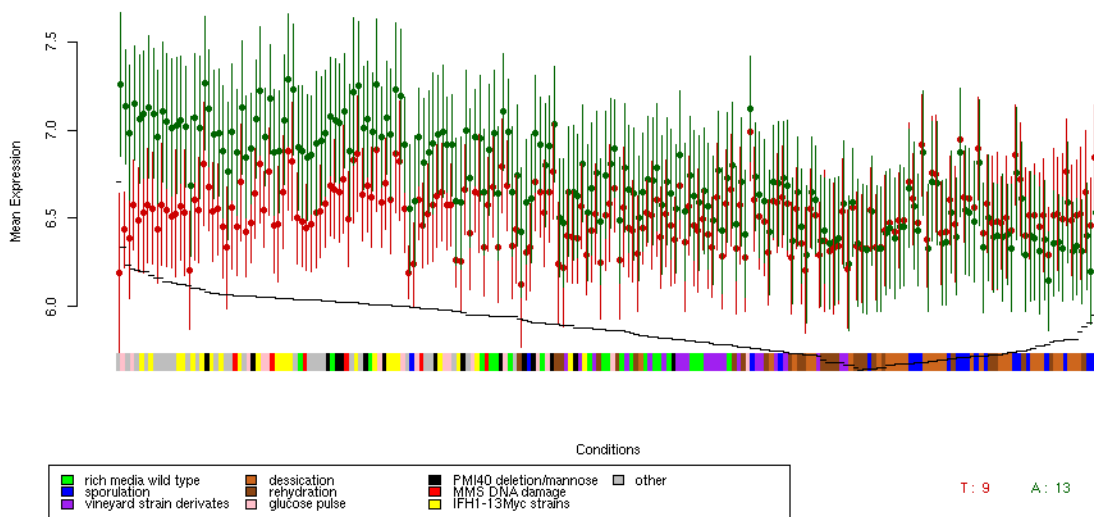



### S. cerevisiae doublePAC position 13

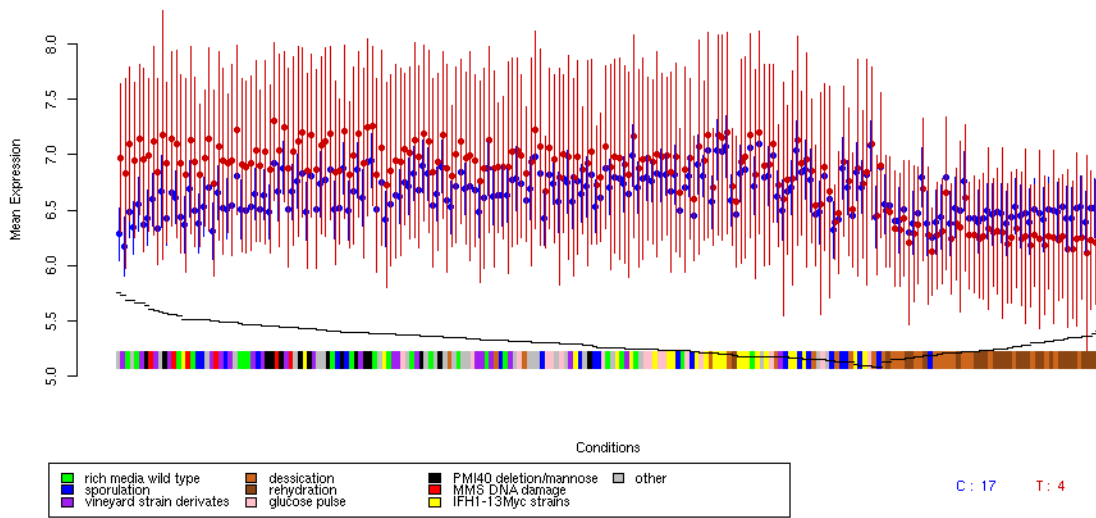

### S. cerevisiae FKH2 position 1

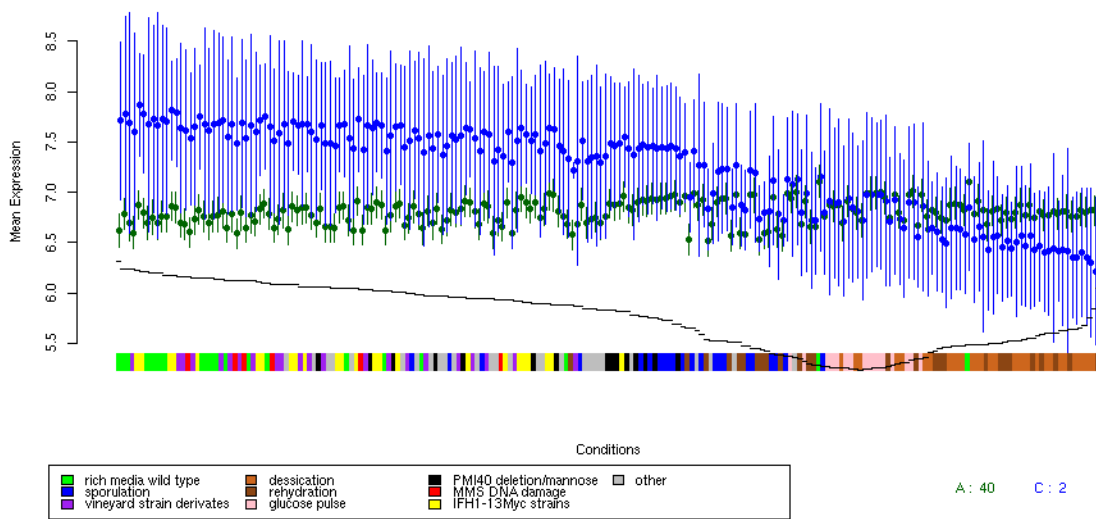

### S. cerevisiae FKH2 position 1

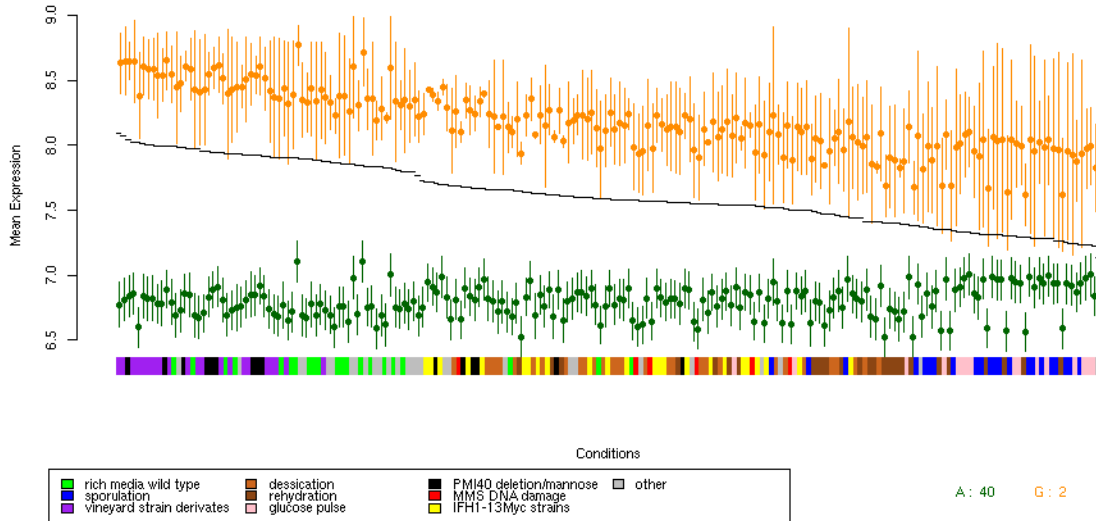

**S. cerevisiae FKH2 position 1**

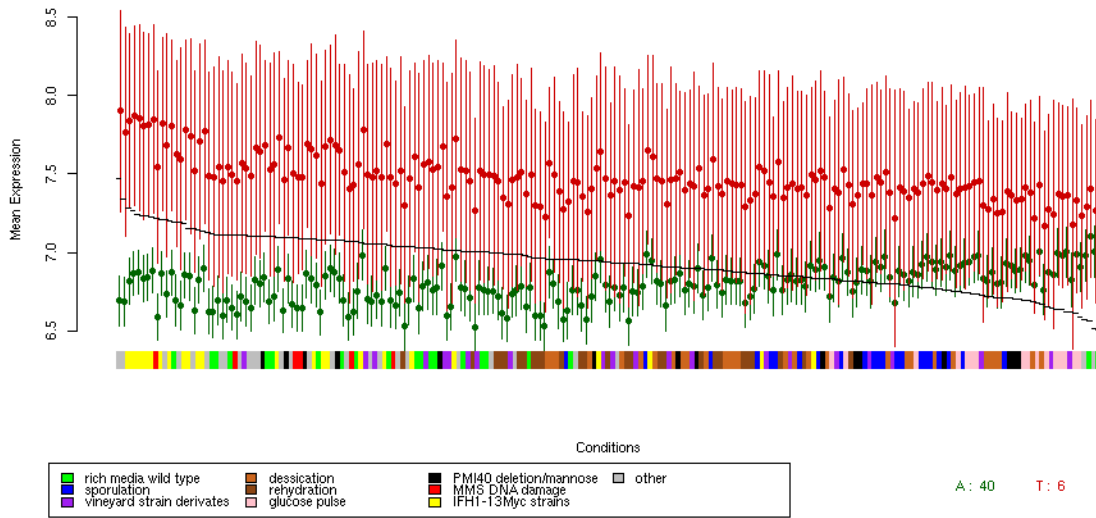

**S. cerevisiae FKH2 position 1**

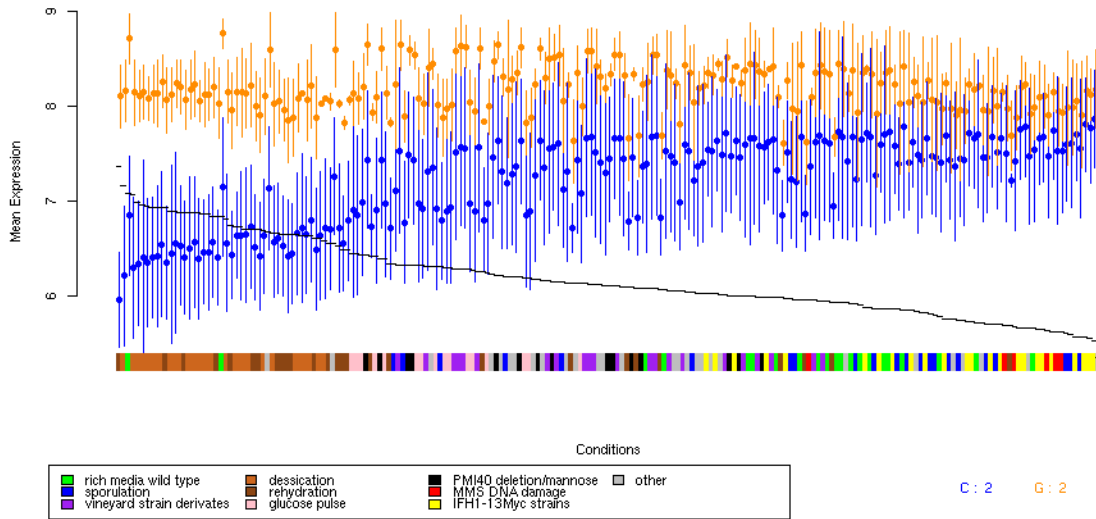

**S. cerevisiae FKH2 position 1**

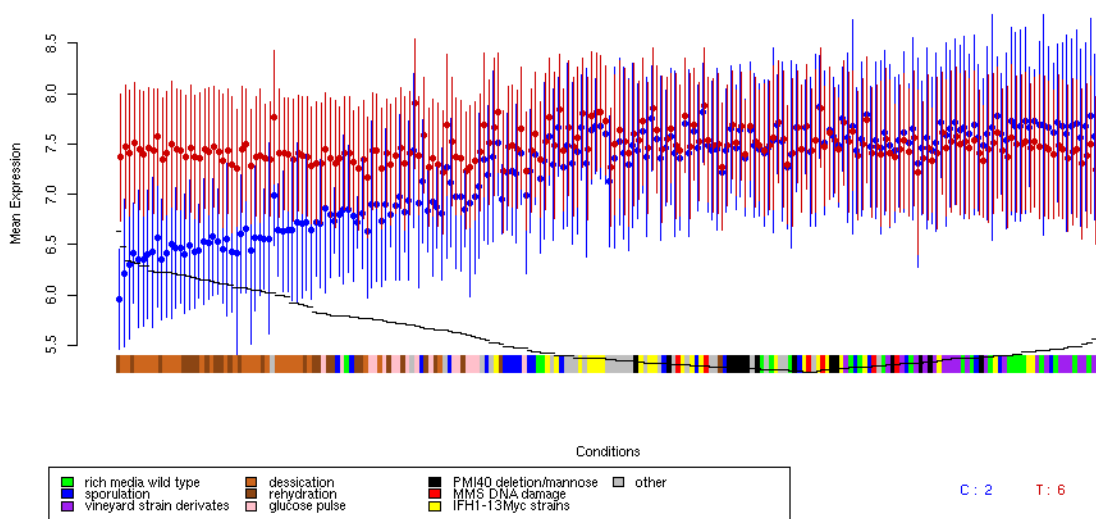

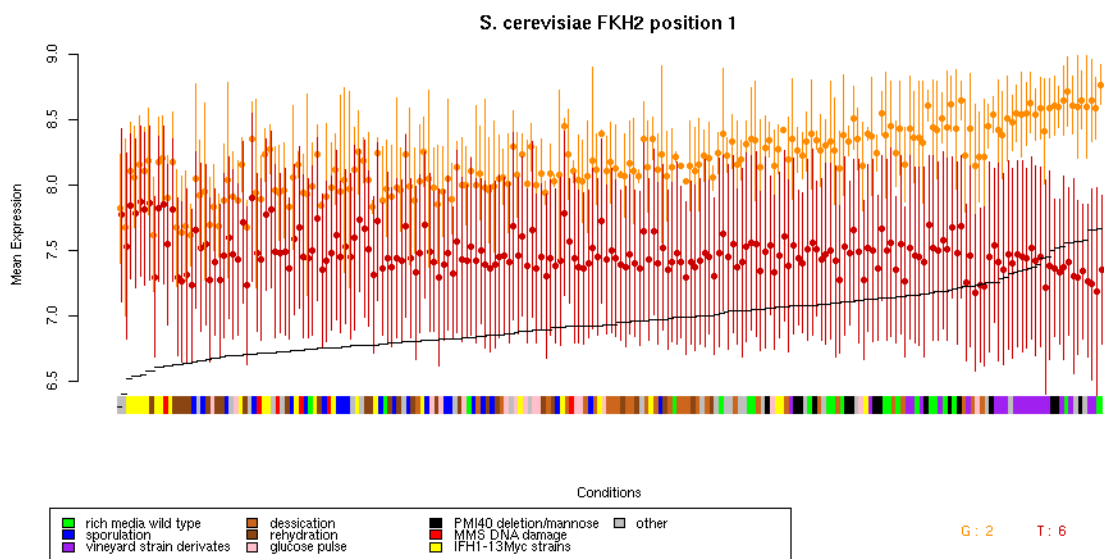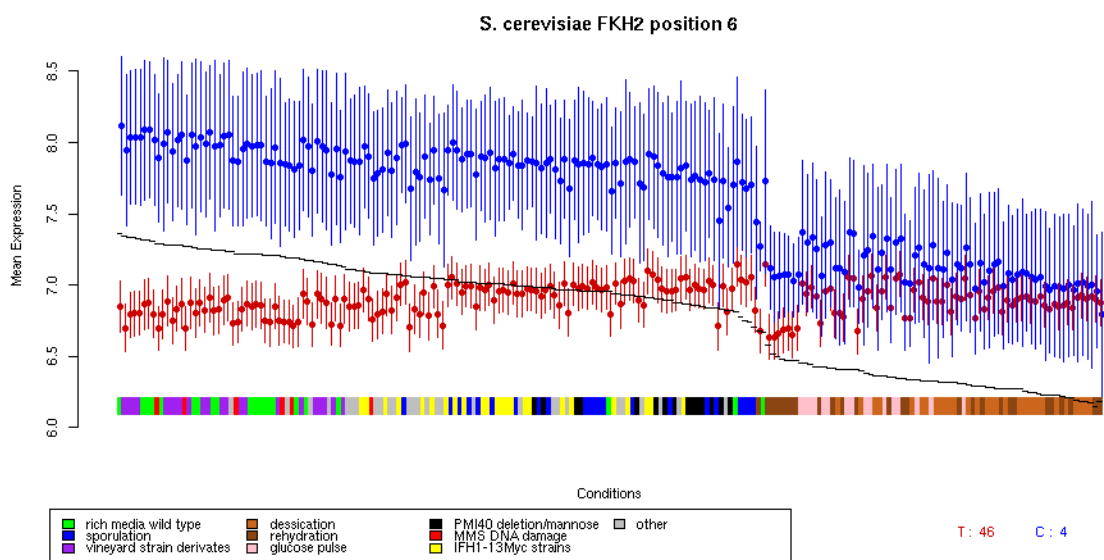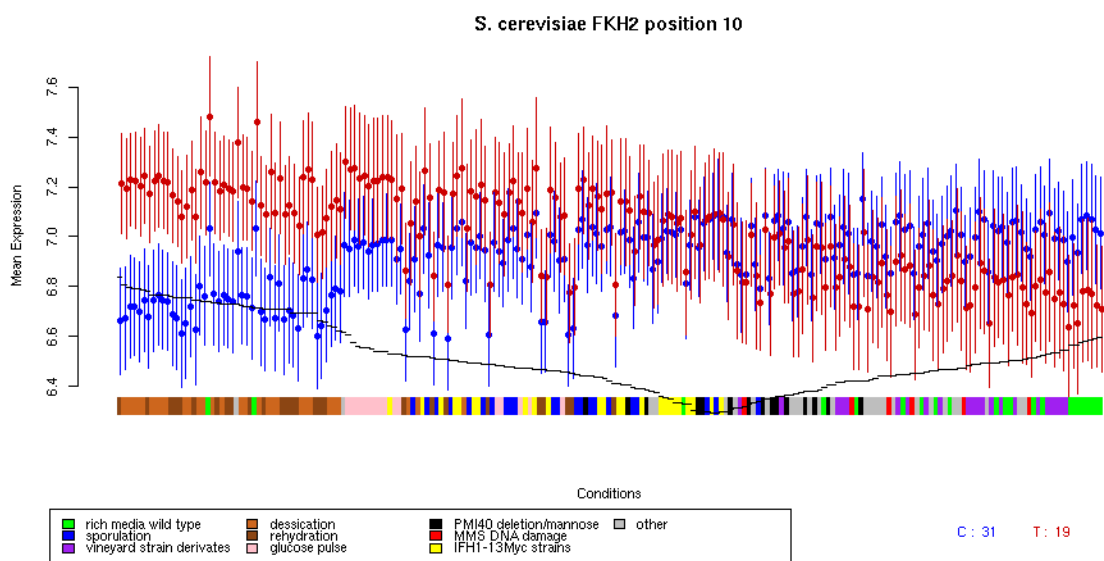

*S. cerevisiae* FKH2 position 11

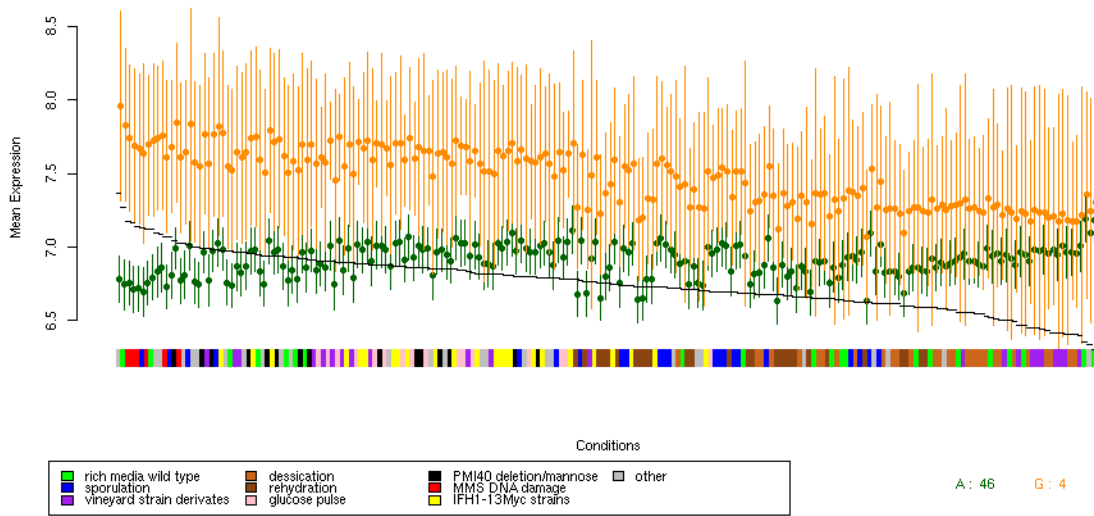

*S. cerevisiae* FKH2 position 12

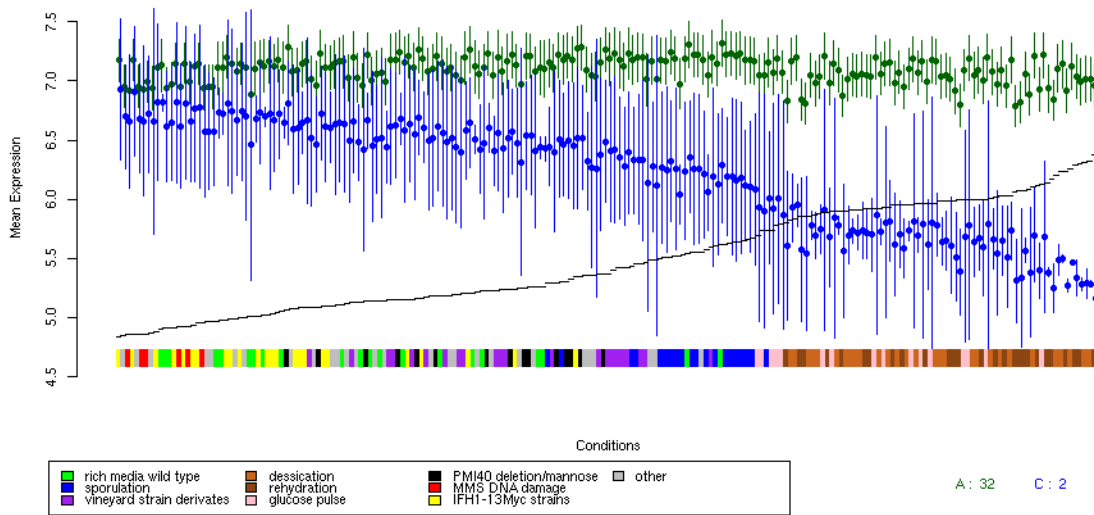

*S. cerevisiae* FKH2 position 12

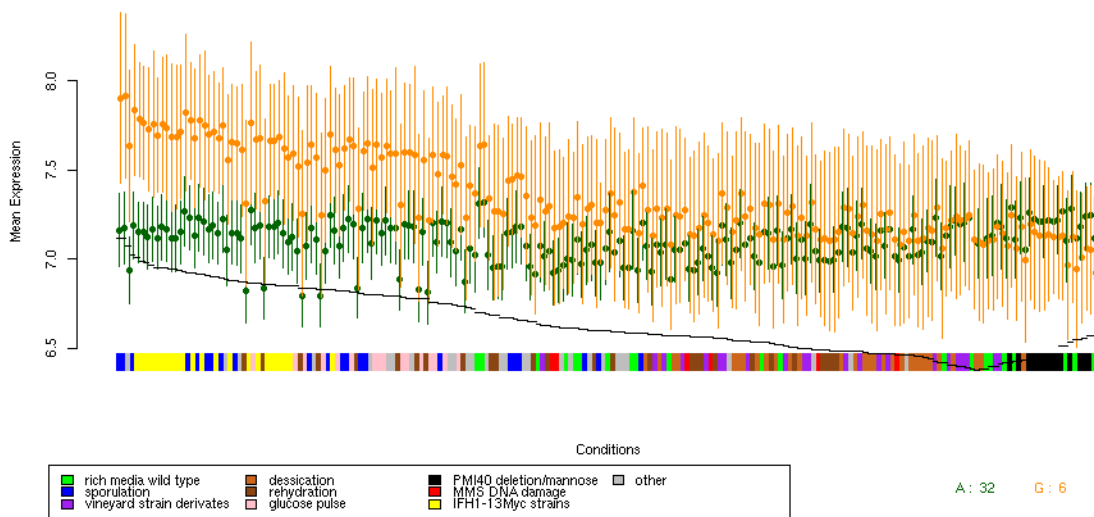

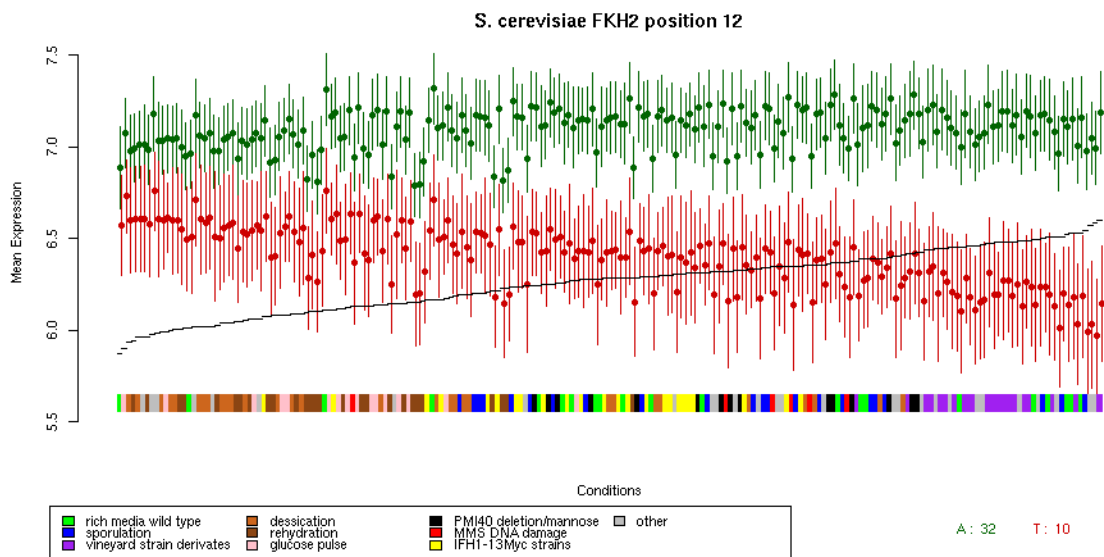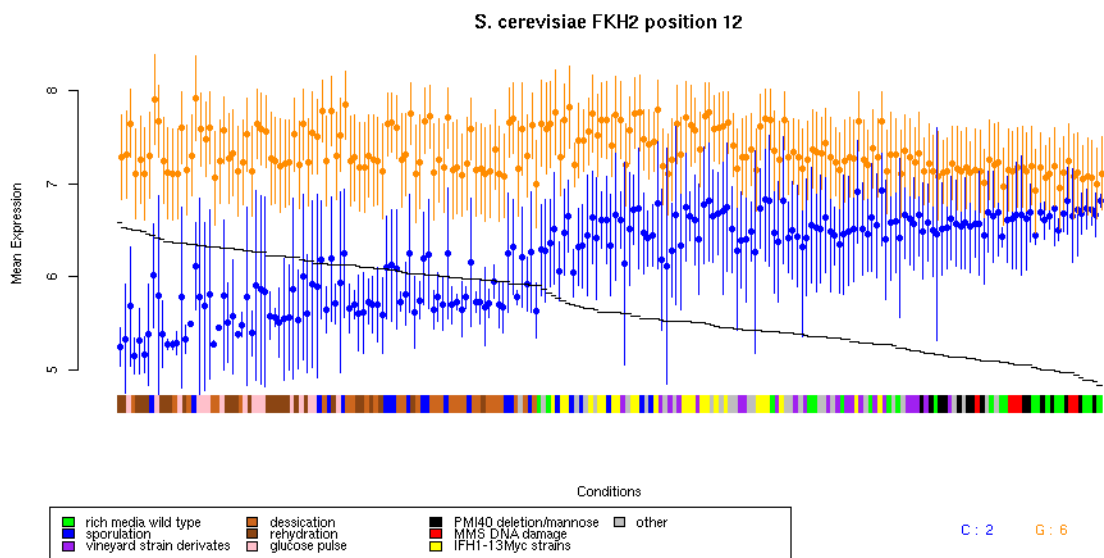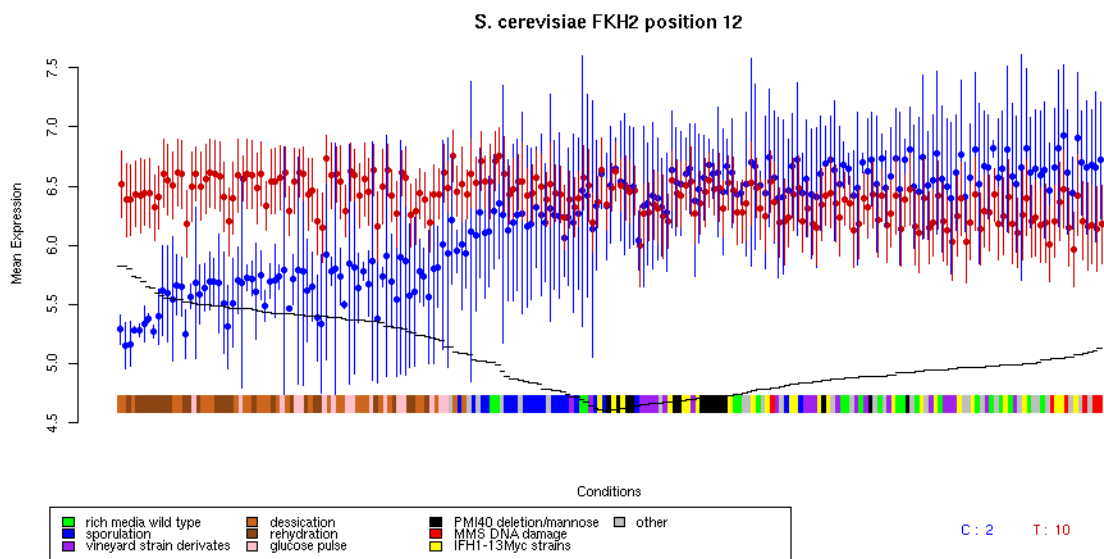

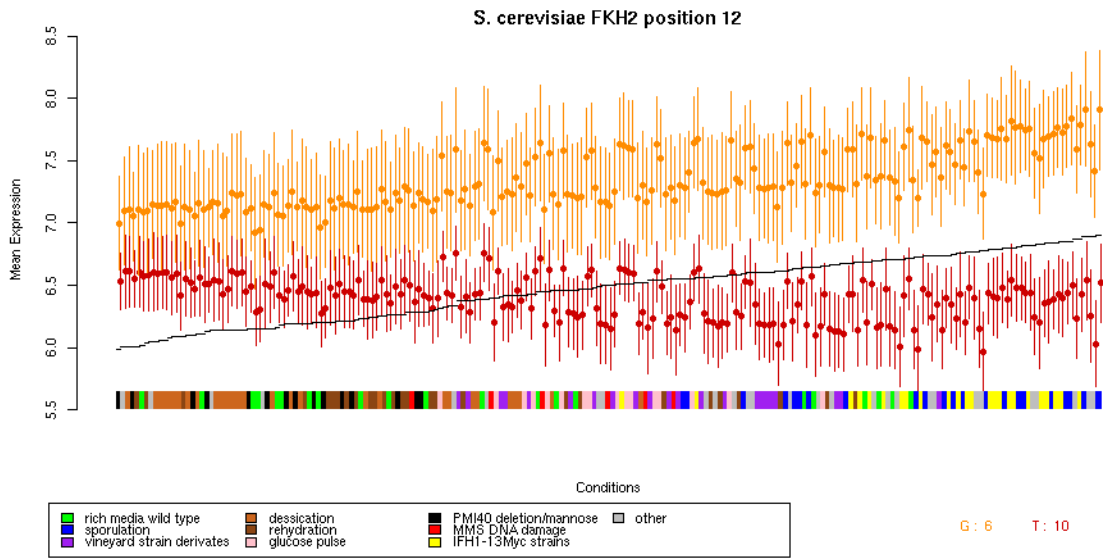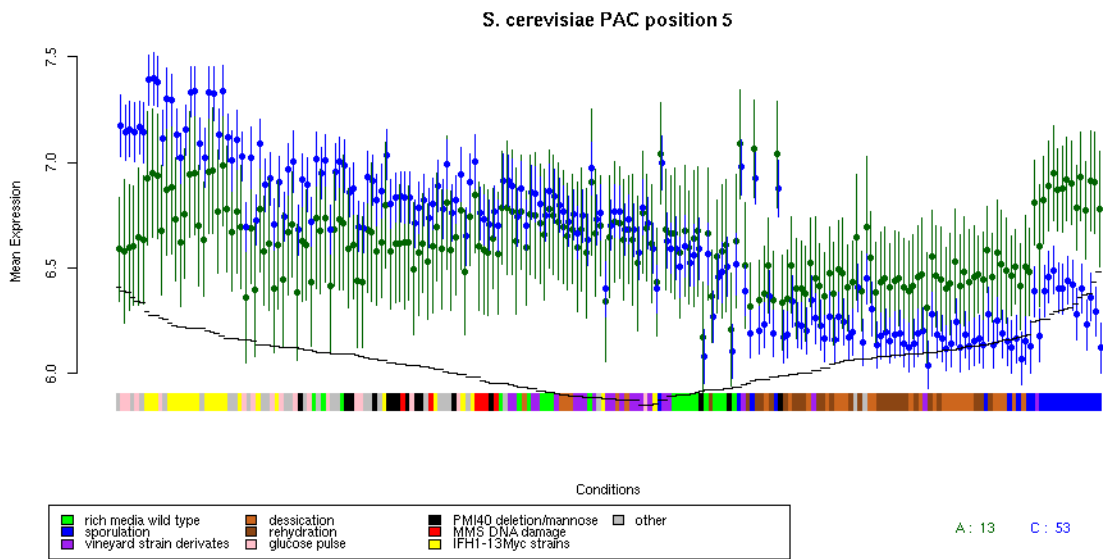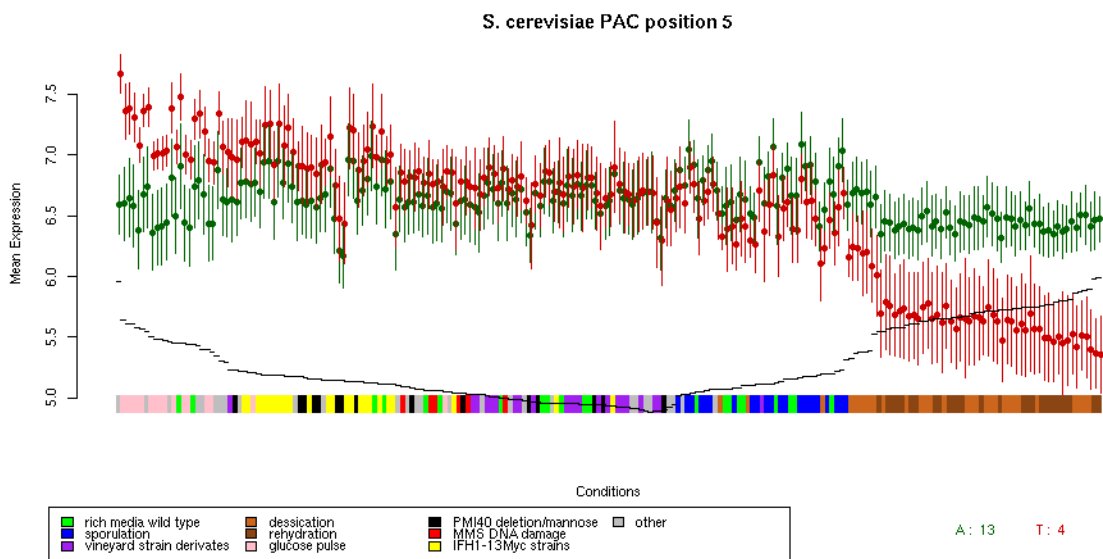

***S. cerevisiae* PAC position 5**

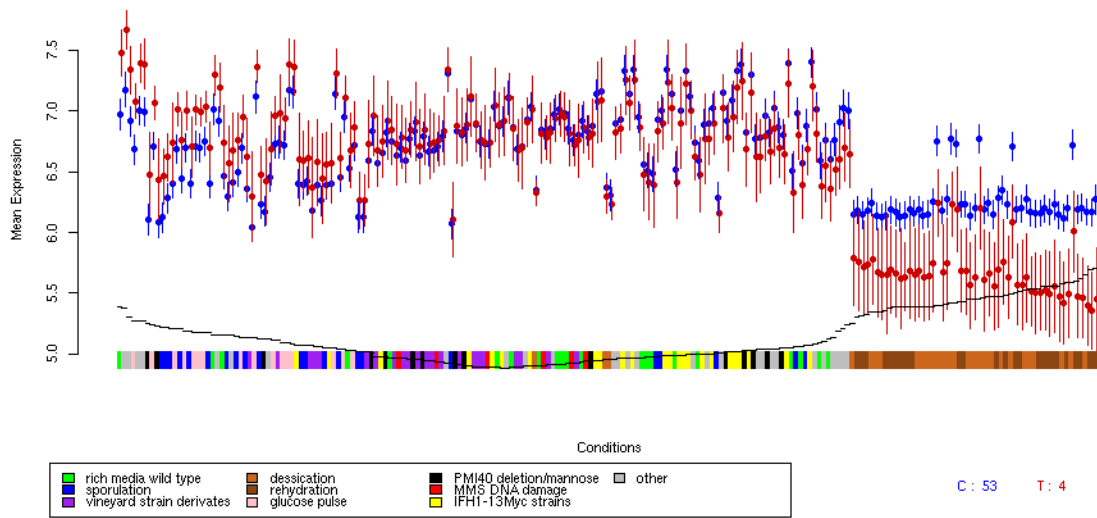

***S. cerevisiae* RGT1 position 2**

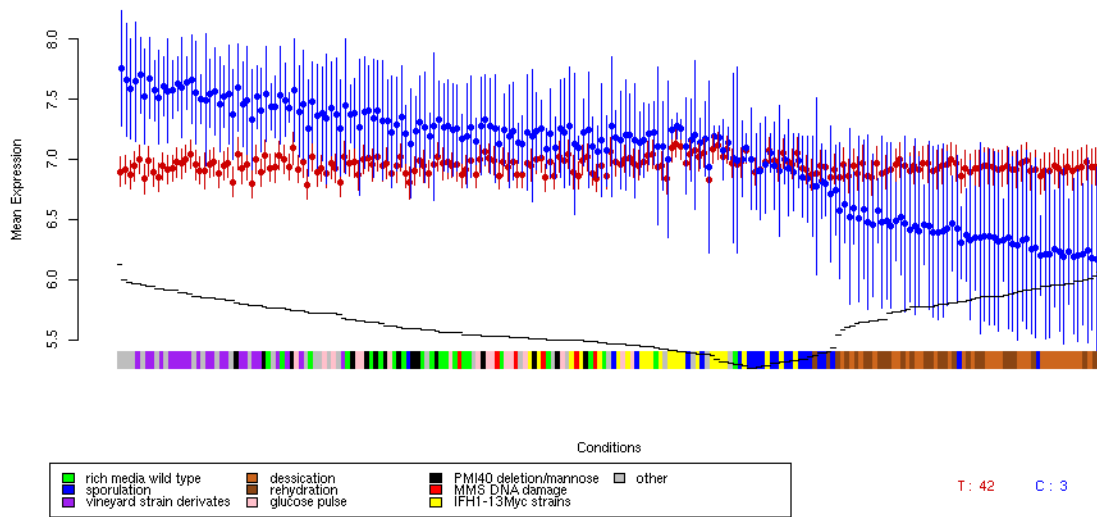

***S. cerevisiae* ROX1 position 9**

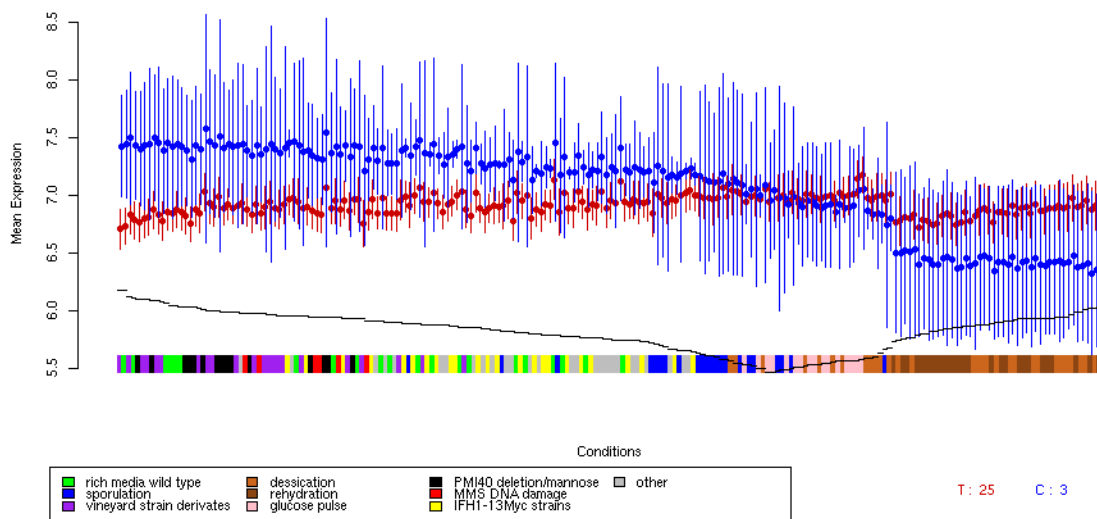

*S. cerevisiae* RPN4 position 10

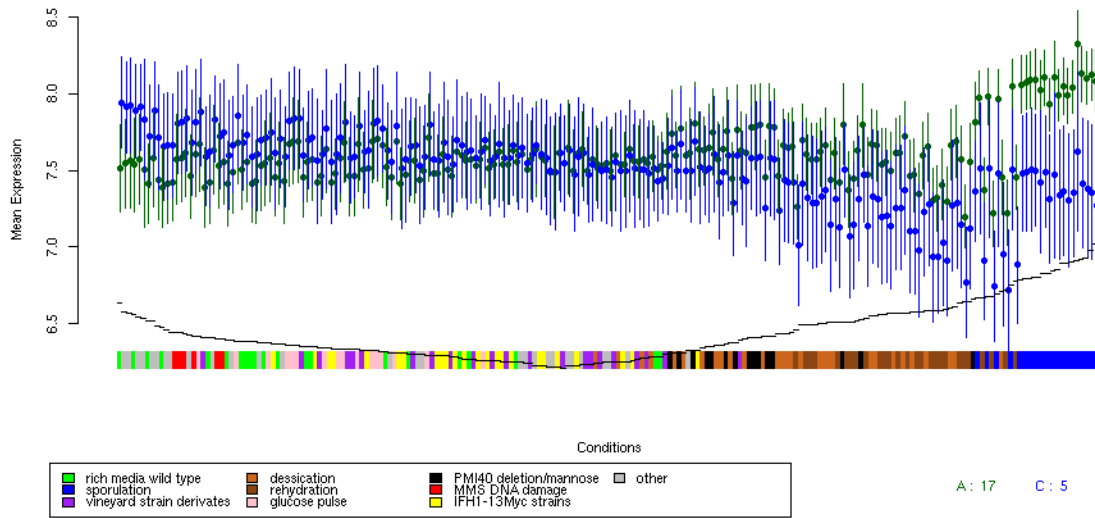

*S. cerevisiae* RPN4 position 10

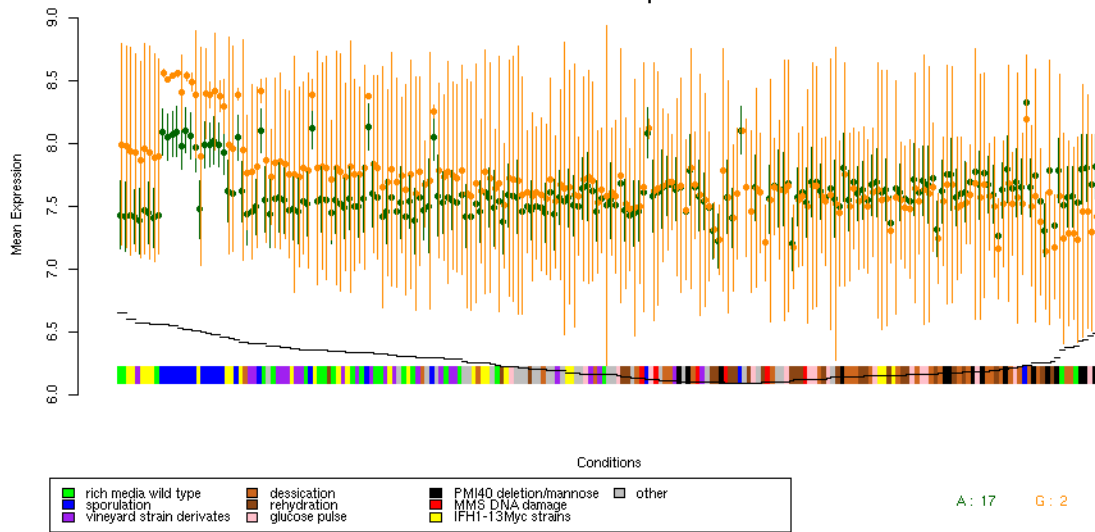

*S. cerevisiae* RPN4 position 10

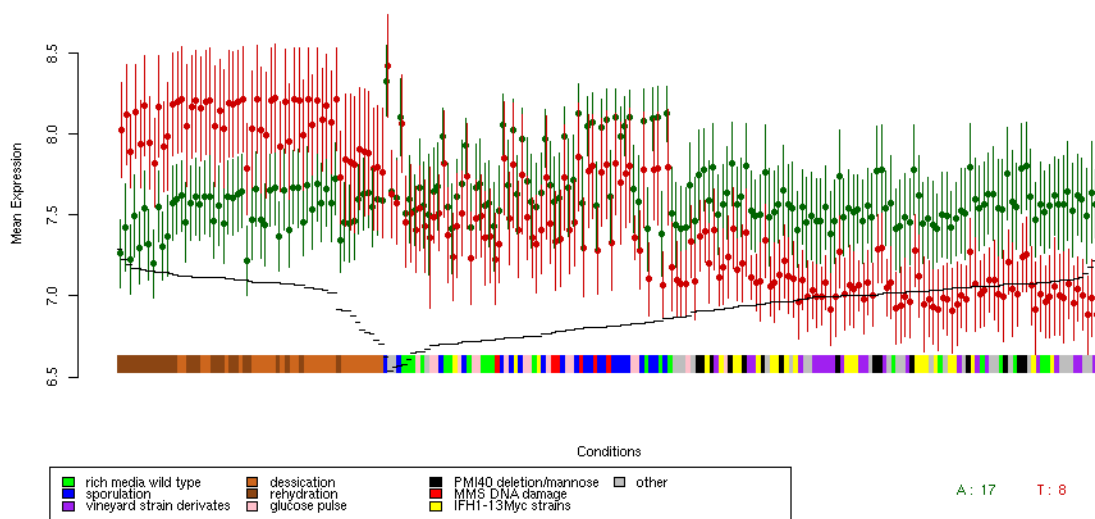



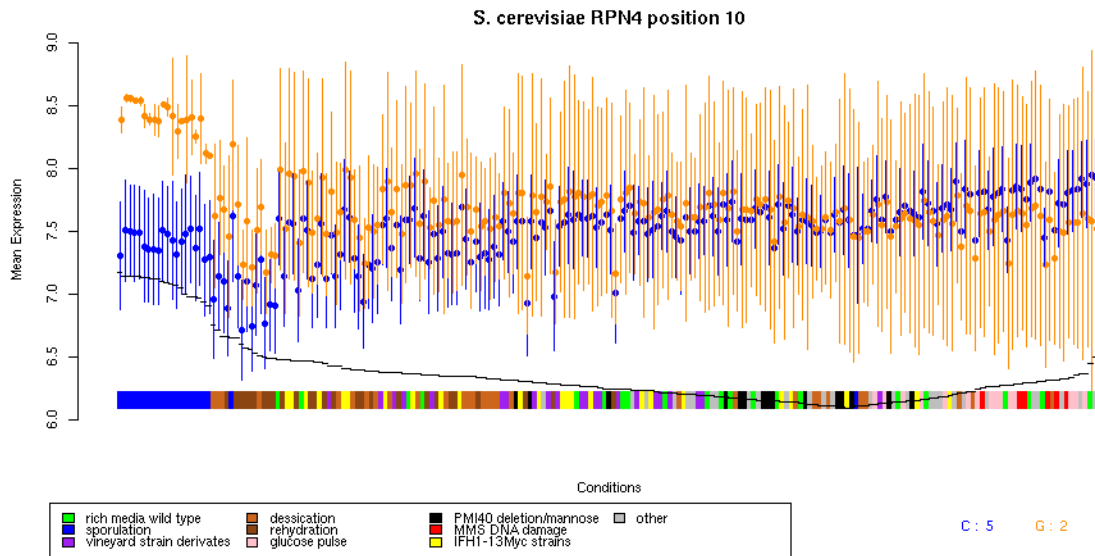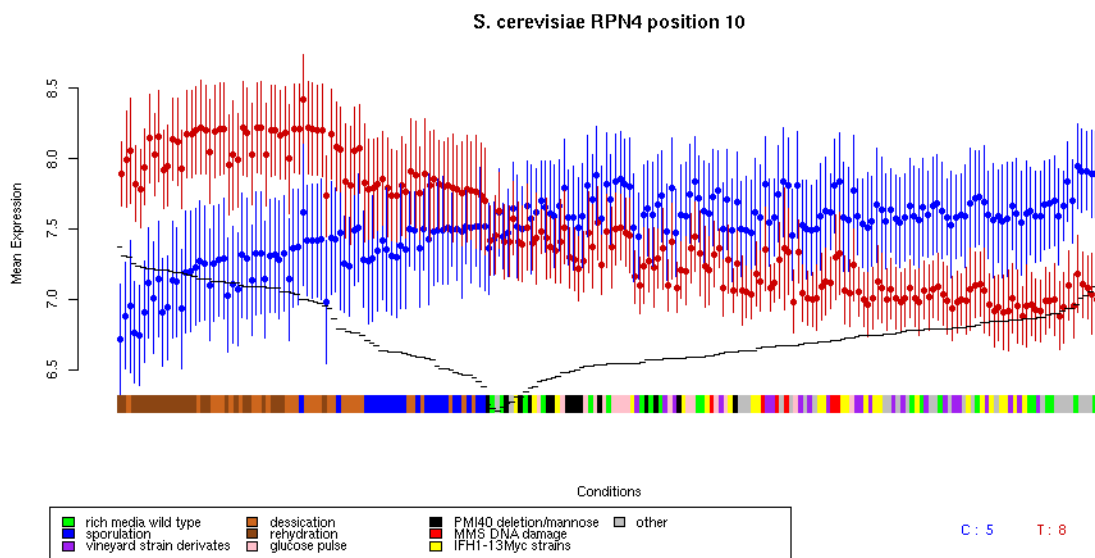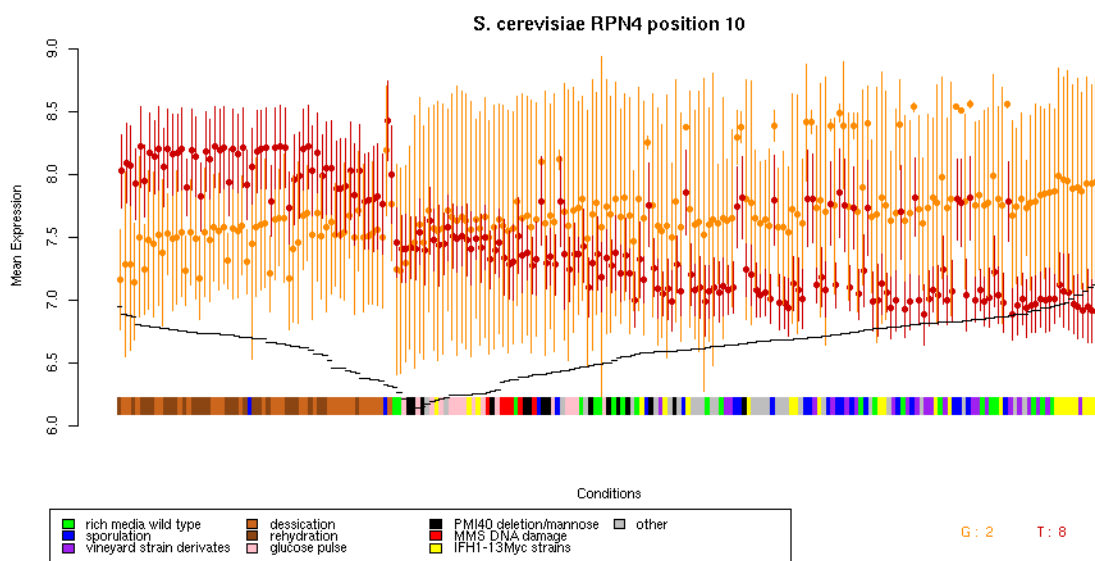

**S. cerevisiae SUM1 position 8**

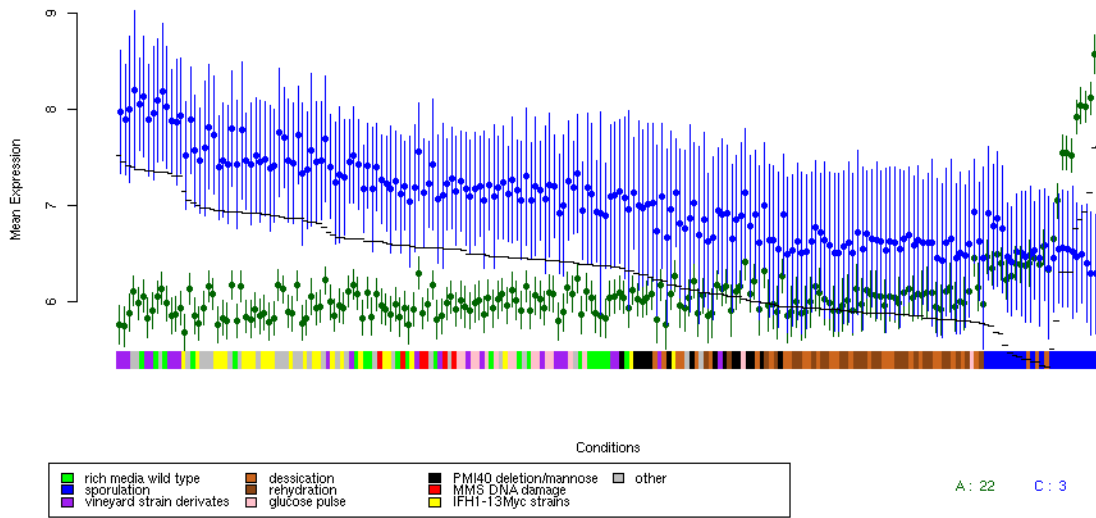

**S. cerevisiae SUM1 position 8**

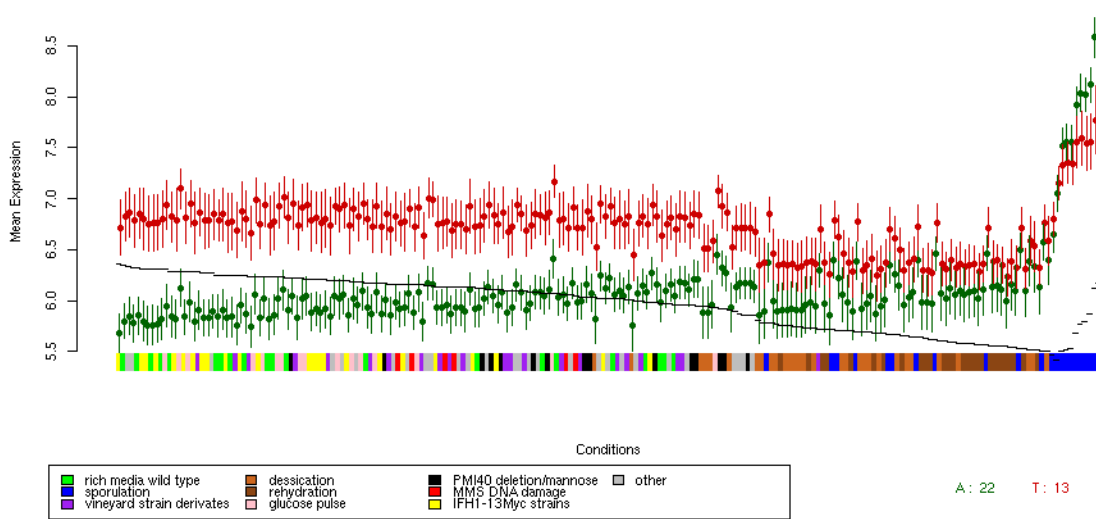

**S. cerevisiae SUM1 position 8**

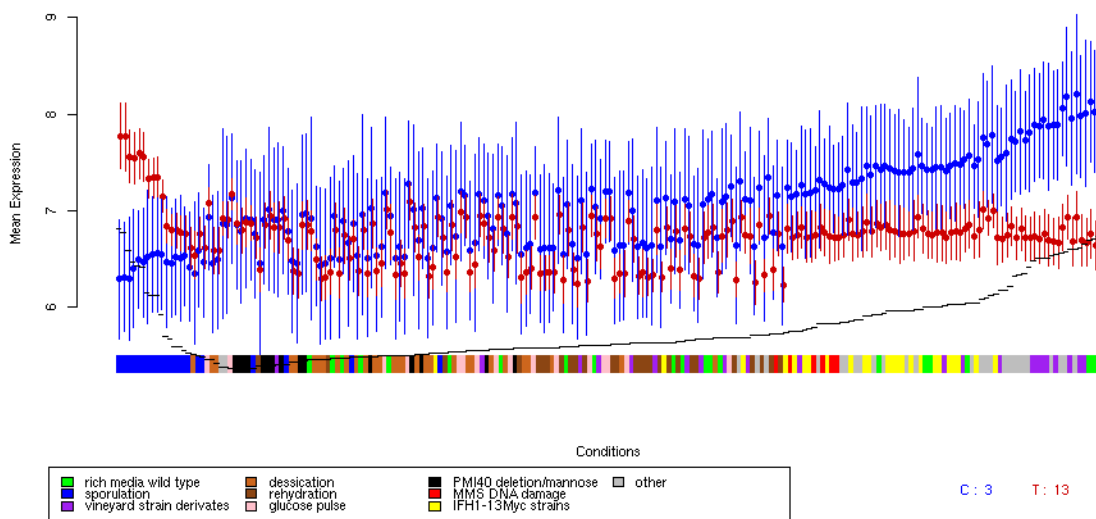

### S. cerevisiae TEC1 position 4

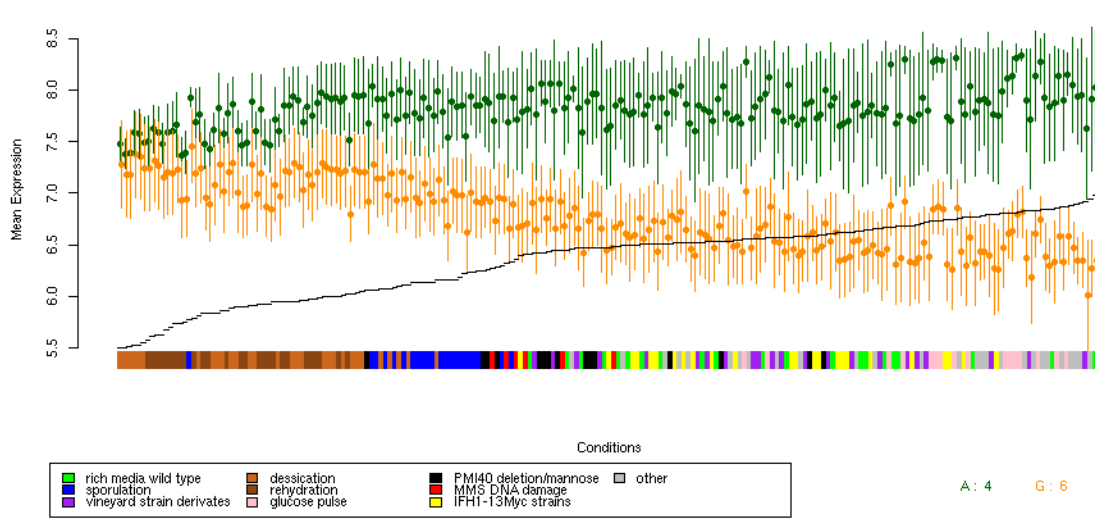

### S. cerevisiae THI2 position 8

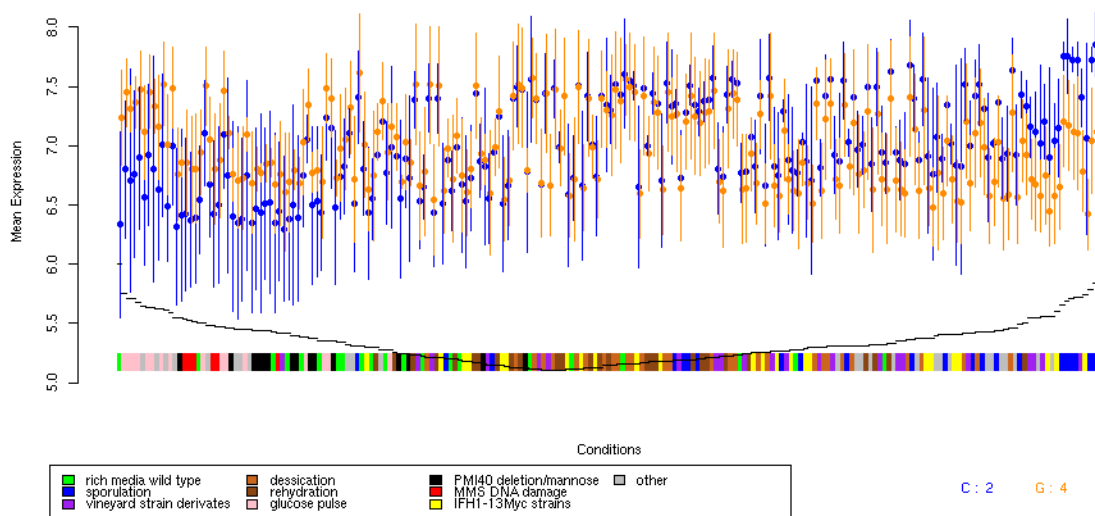

### S. cerevisiae THI2 position 8

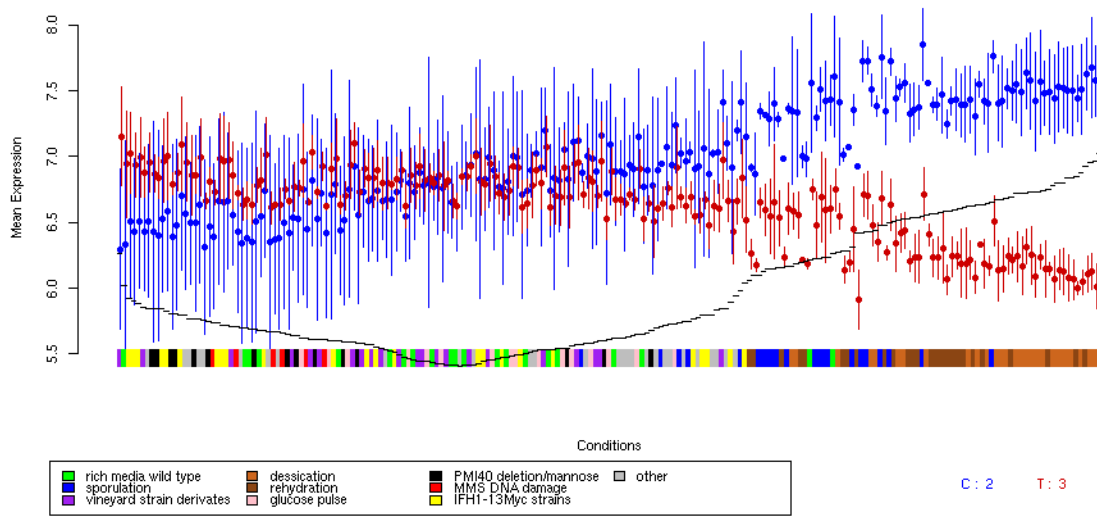

### S. cerevisiae THI2 position 8

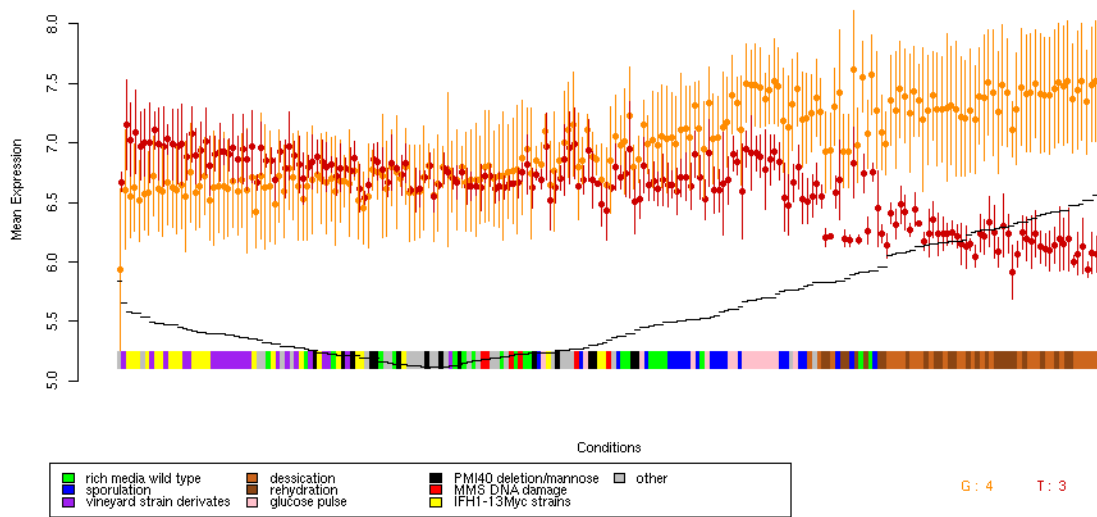

Supplement: S1 (10.1371/journal.pone.0032274.s001) [file journal.pone.0032274.s001]
