# Supplementary material for: Contribution of Transcription Factor Binding Site Motif Variants to Condition-Specific Gene Expression Patterns in Budding Yeast
Source: PLOS journal article supplement (doi:10.1371/journal.pone.0032274), 2012-02-23

**Figure S5. Complete set of figures showing comparison of average gene expression levels between genes with different functional variants of transcription factor binding site motifs in *S. cerevisiae*, *S. kudriavzevii*, *S. mikatae* and *S. paradoxus* based on expression data from Y6.4kv6 cDNA arrays.** Mean expression levels for target genes of functional variants found at positions in TF binding sites using expression data from Y6.4kv6 cDNA arrays and stress conditions. Even if more than two variants exist at a position, only two are shown in each individual graph, and additional graphs show the pairwise comparison between each variant present at each position. The means are ordered across conditions according to the difference between mean expression of the two variants. Vertical lines extending from each point indicate the standard deviation of the mean. Horizontal black bars indicate the difference between the mean ranks. The significance of the functional heterogeneity was determined without reference to the segregation of experimental conditions, which are shown according to color along the x-axis. The number of targets for each variant graphed are shown at the bottom right hand of the graph.

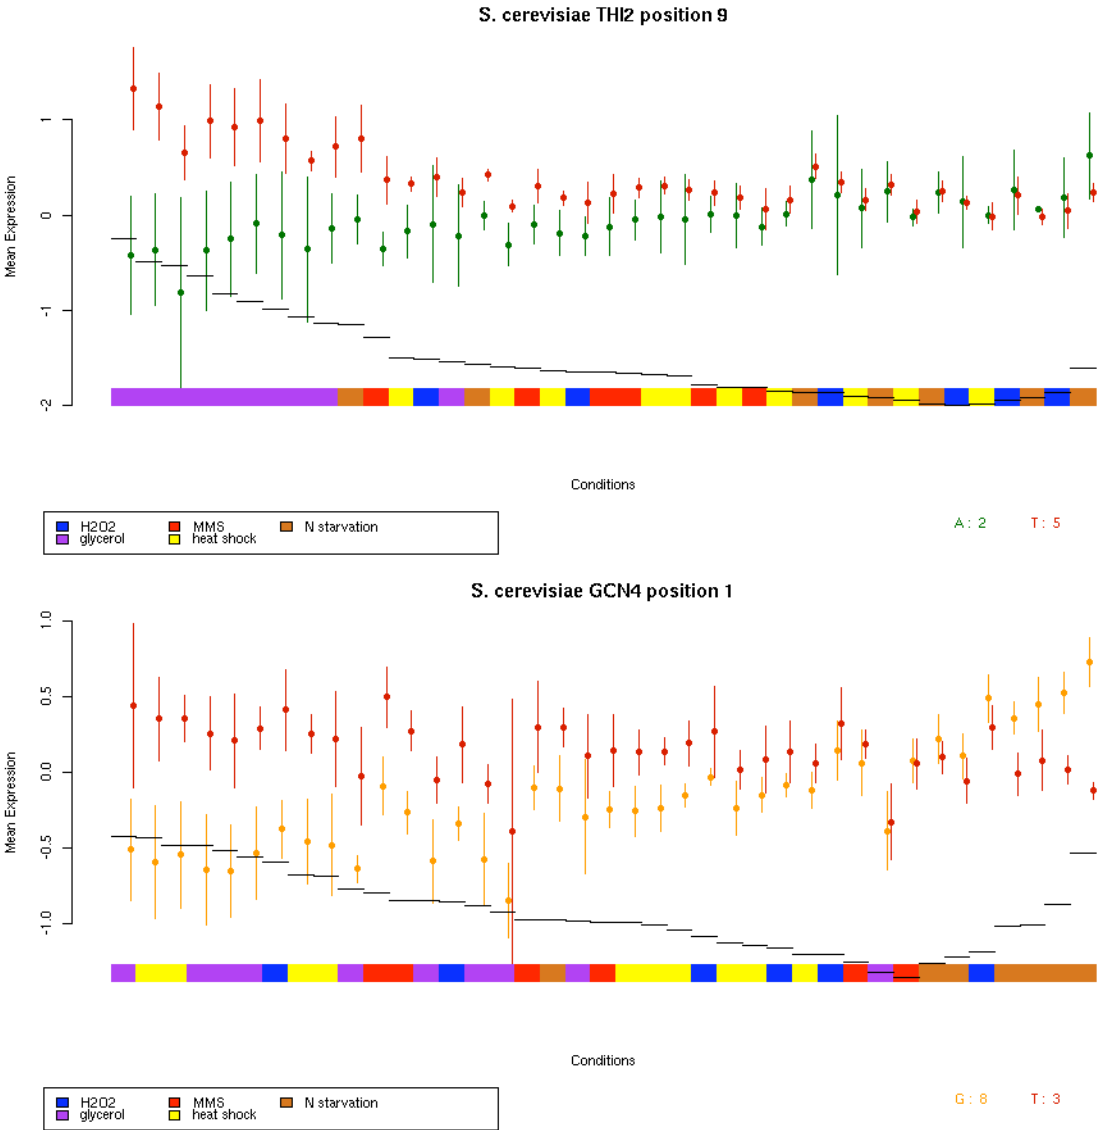

**S. cerevisiae HSF1 position 7**

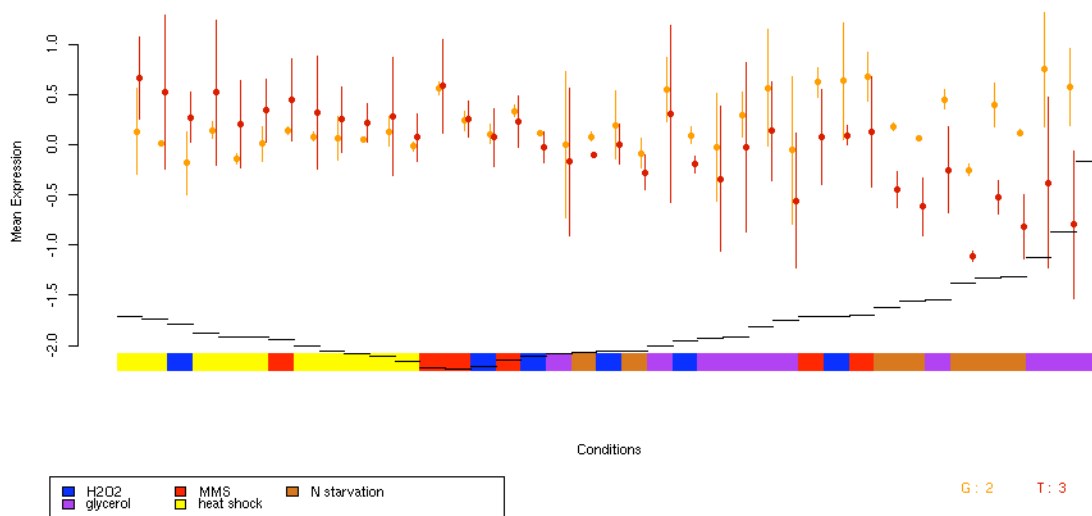

**S. cerevisiae MATalpha2 position 9**

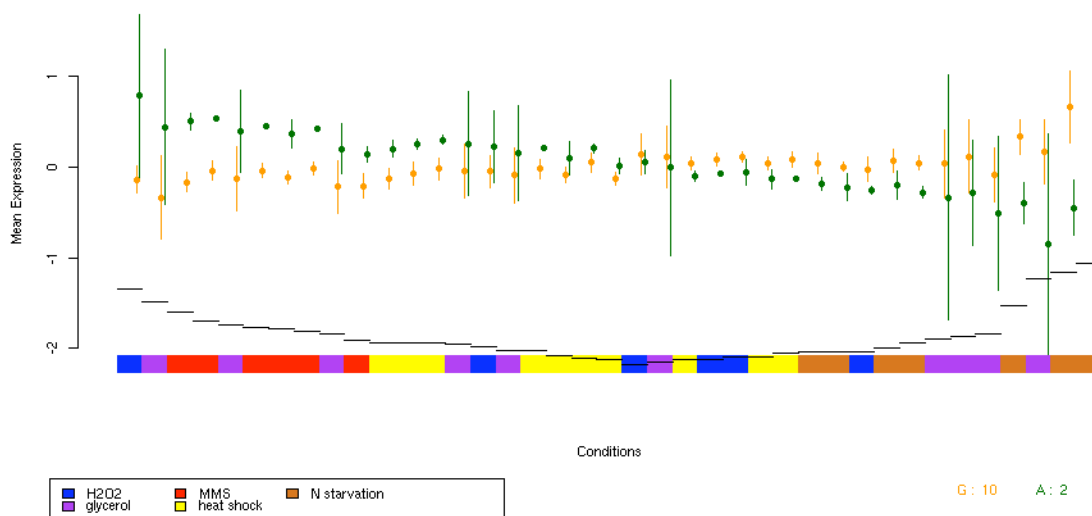

**S. cerevisiae NRG1 position 2**

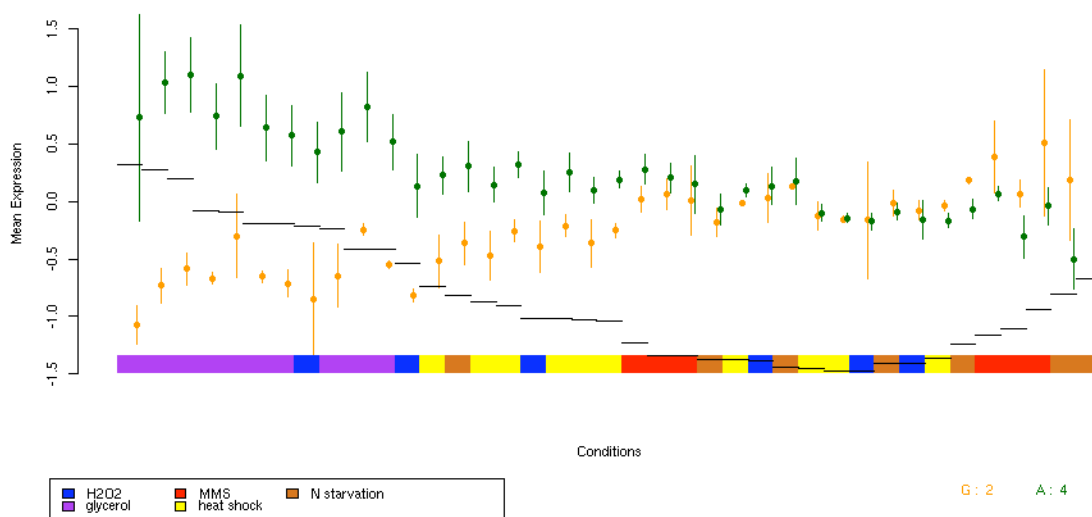

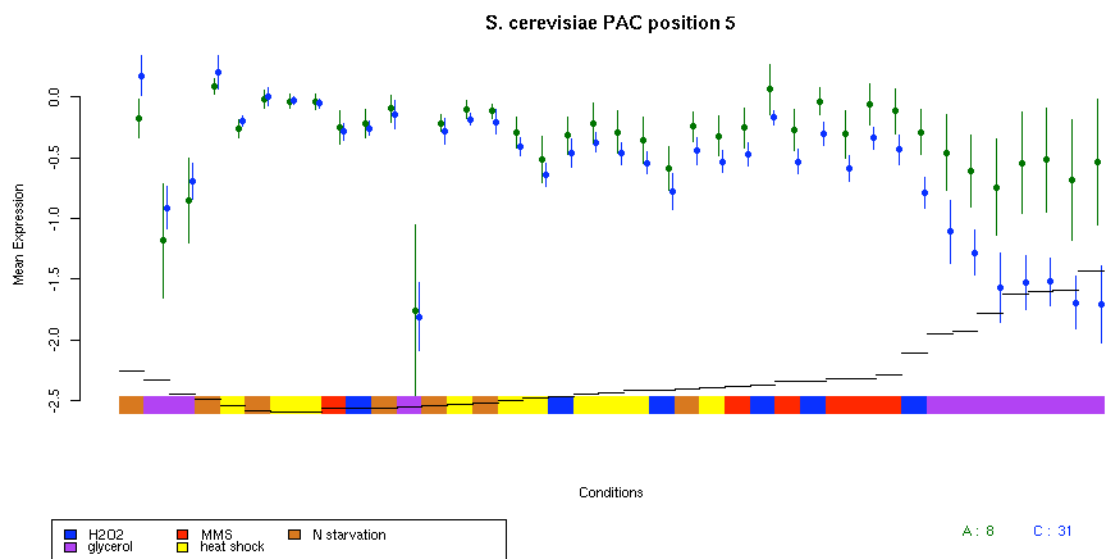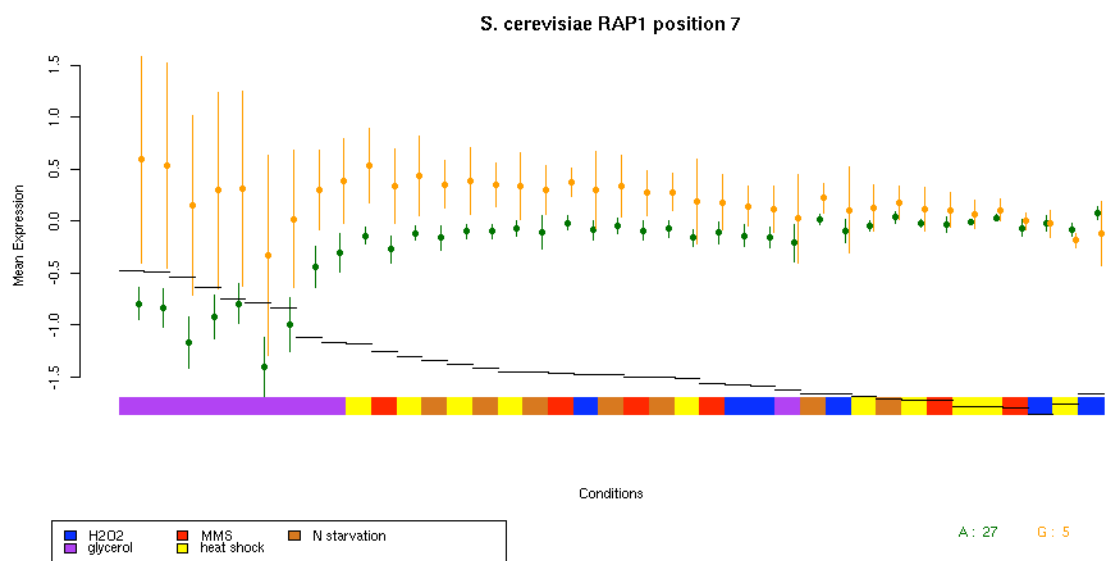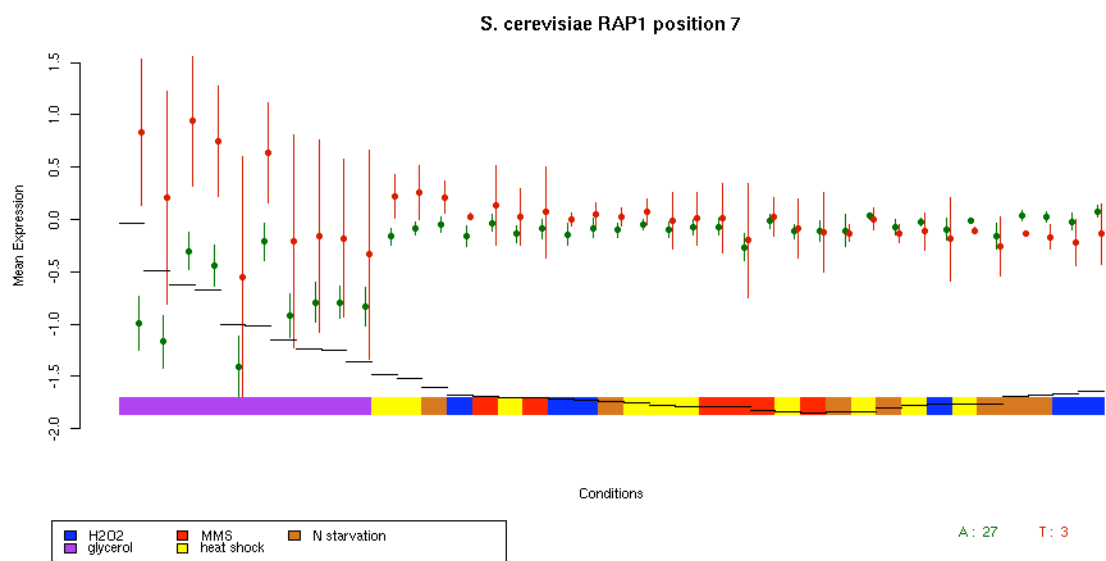

**S. cerevisiae RAP1 position 7**

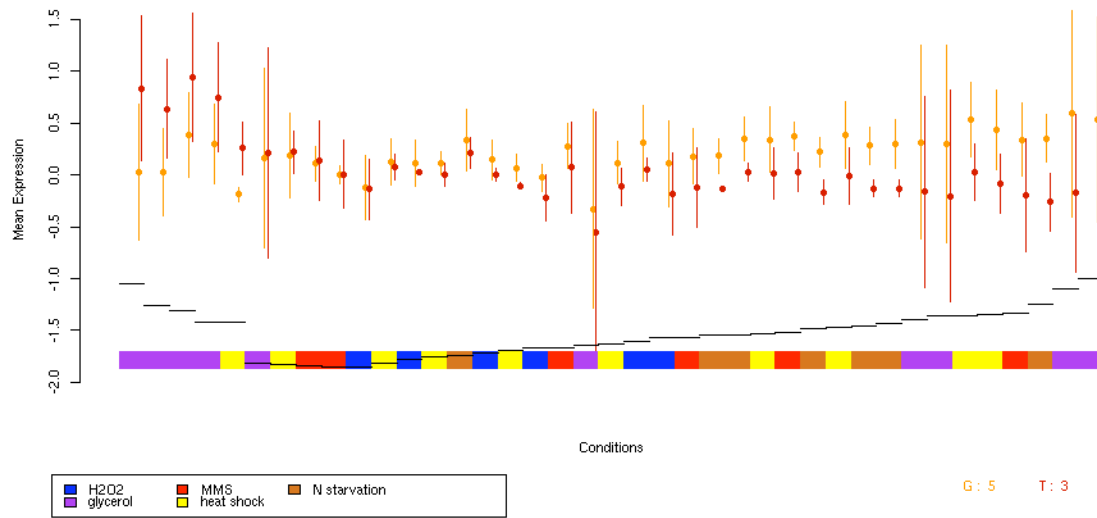

**S. cerevisiae RAP1 position 10**

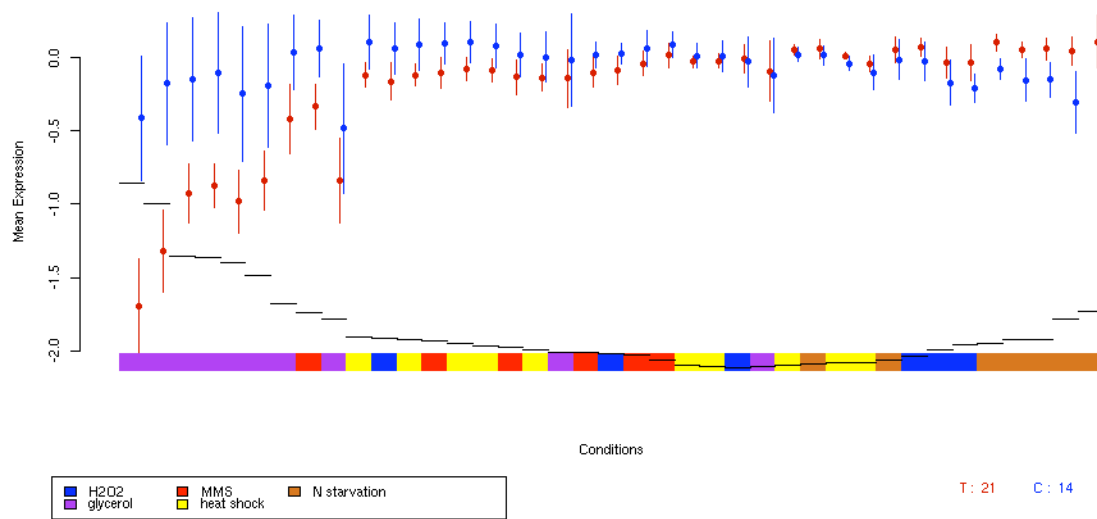

**S. cerevisiae REB1 position 9**

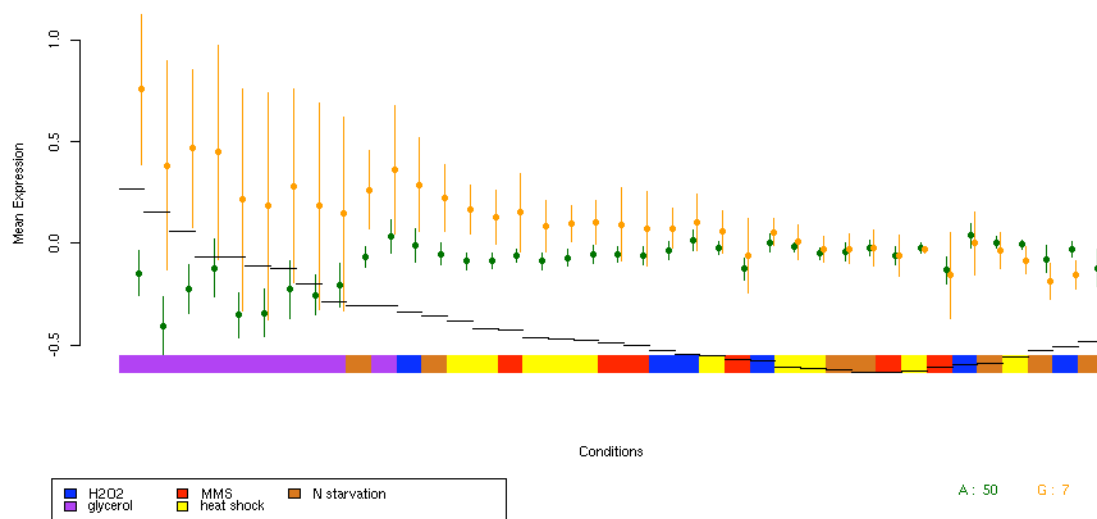

*S. cerevisiae* RPN4 position 10

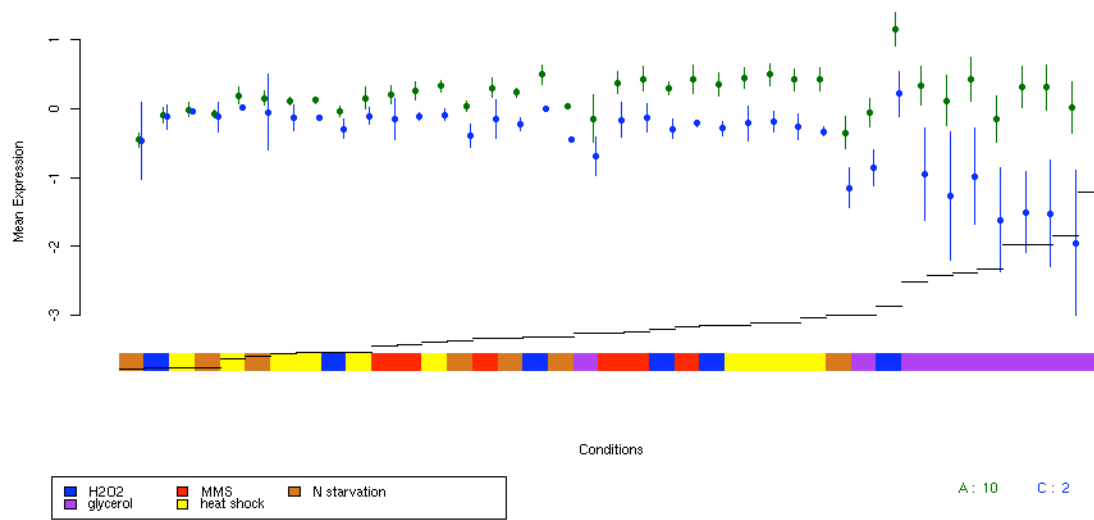

*S. cerevisiae* RPN4 position 10

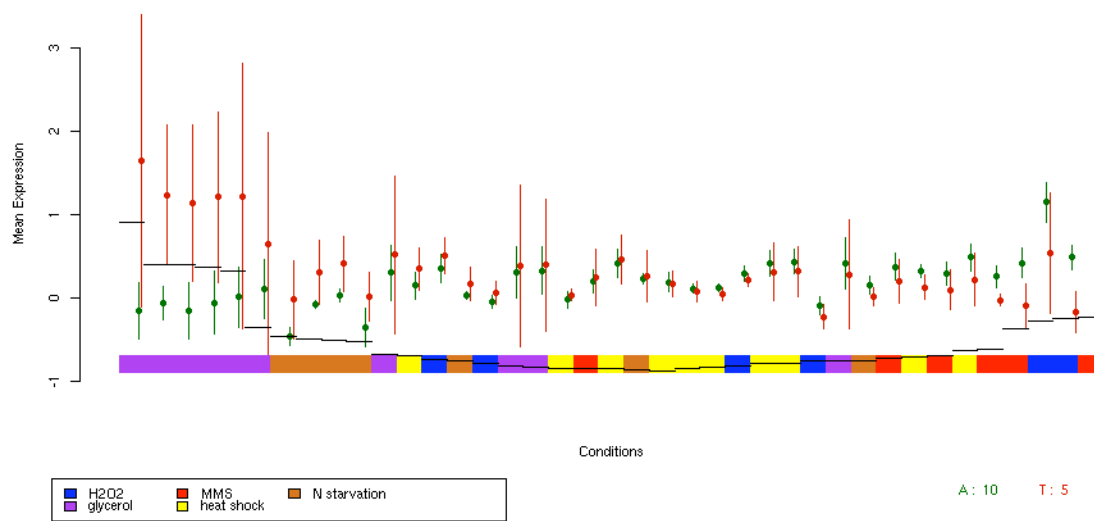

*S. cerevisiae* RPN4 position 10

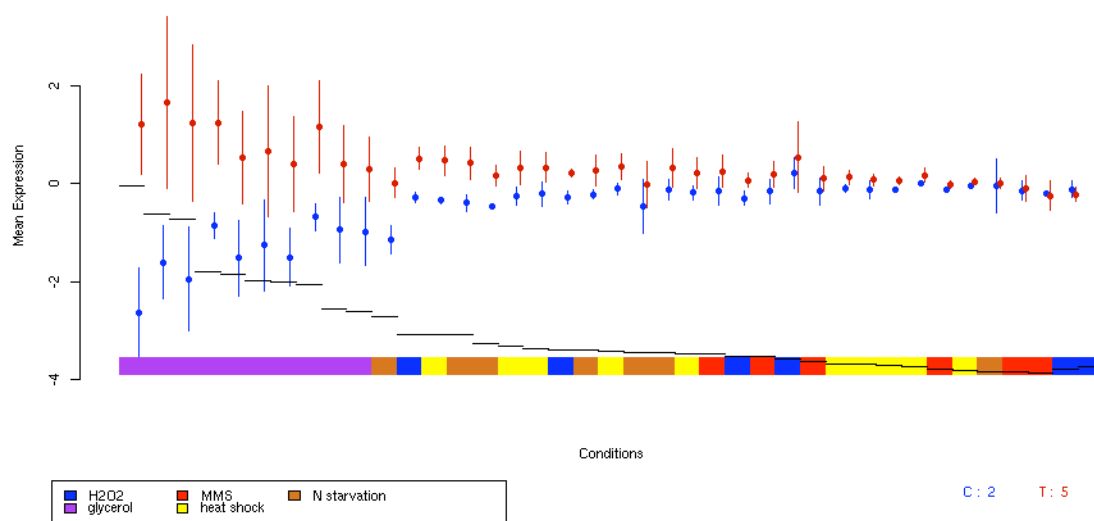

**S. cerevisiae SPT15 position 2**

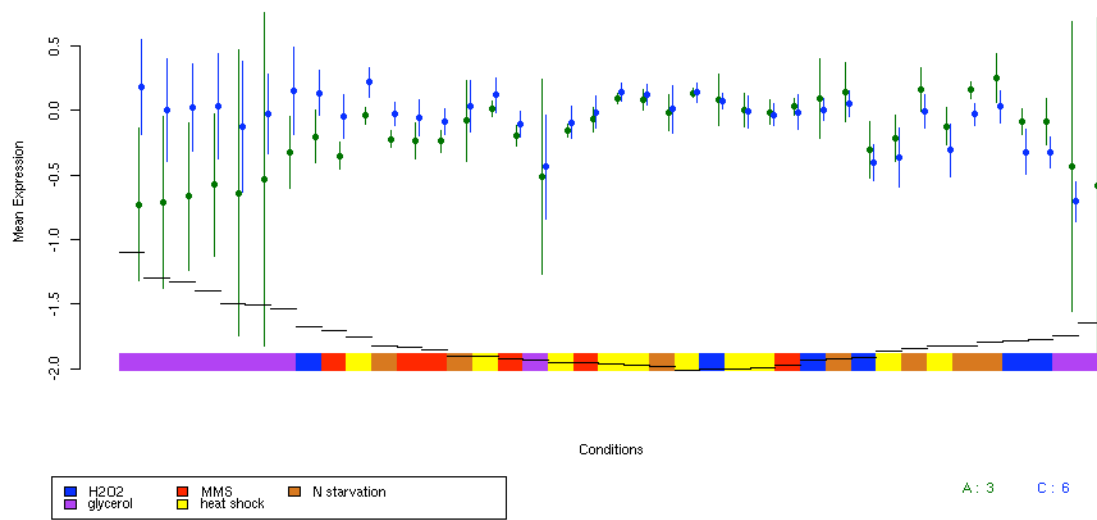

**S. cerevisiae SPT15 position 2**

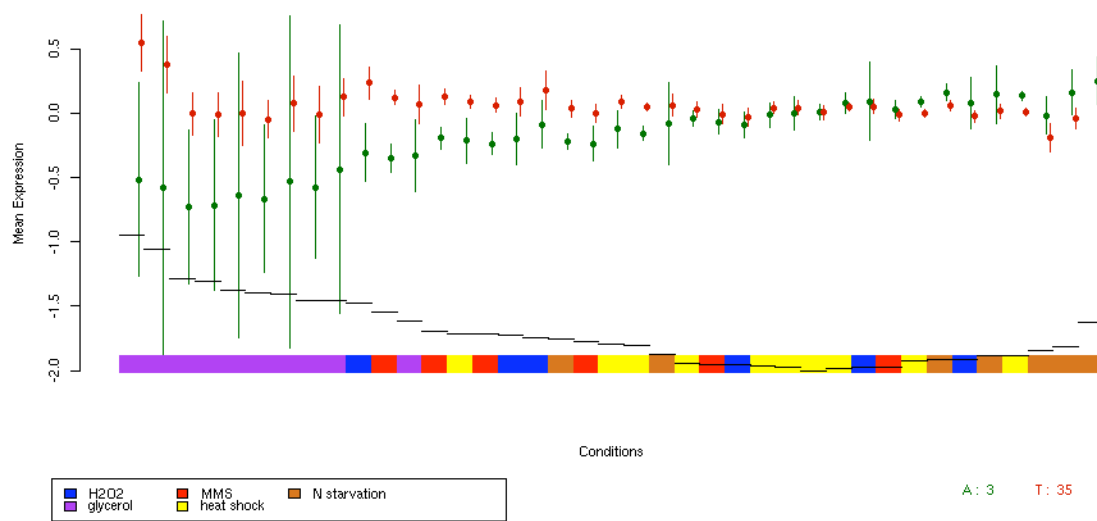

**S. cerevisiae SPT15 position 2**

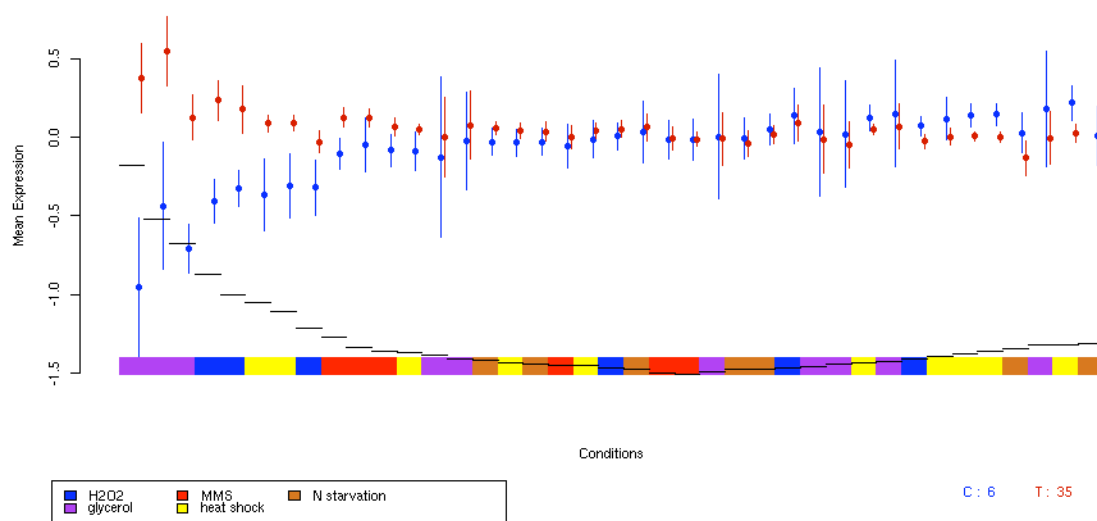

### S. cerevisiae STB5 position 1

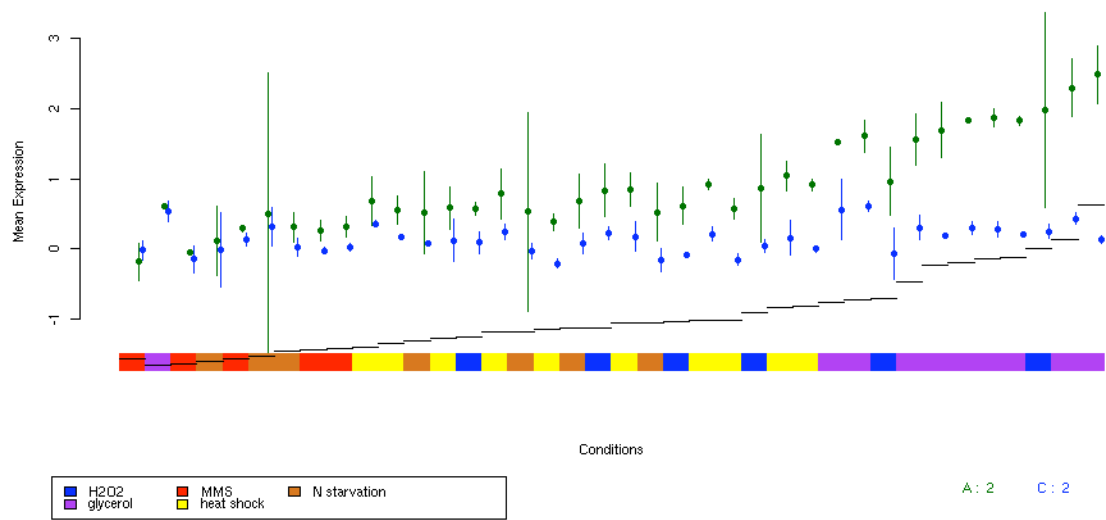

### S. cerevisiae STB5 position 1

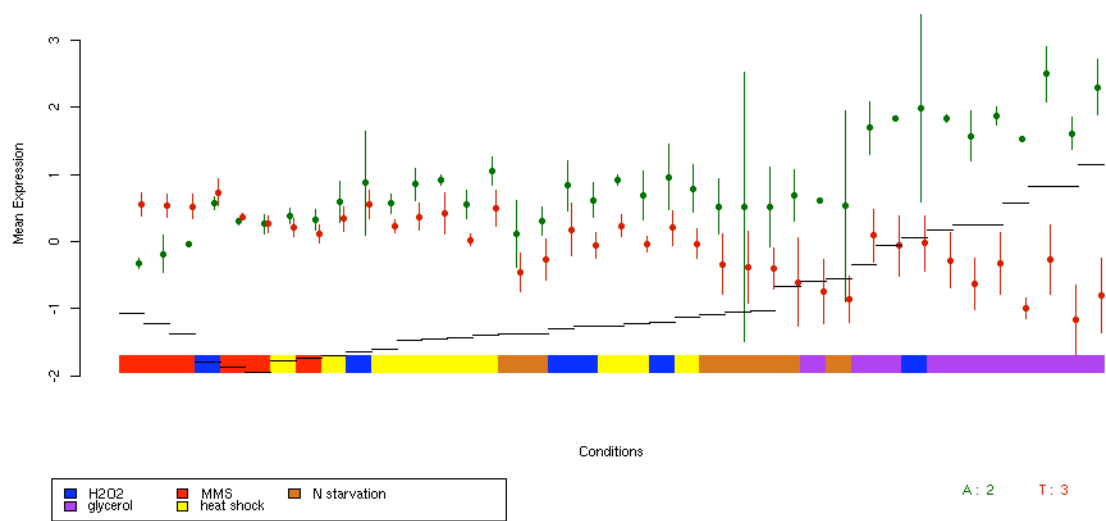

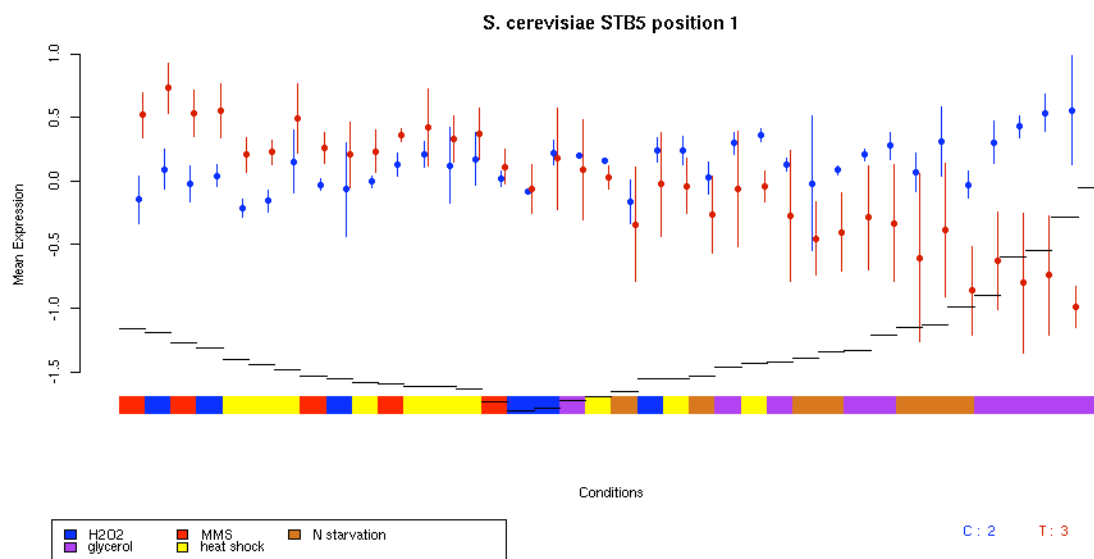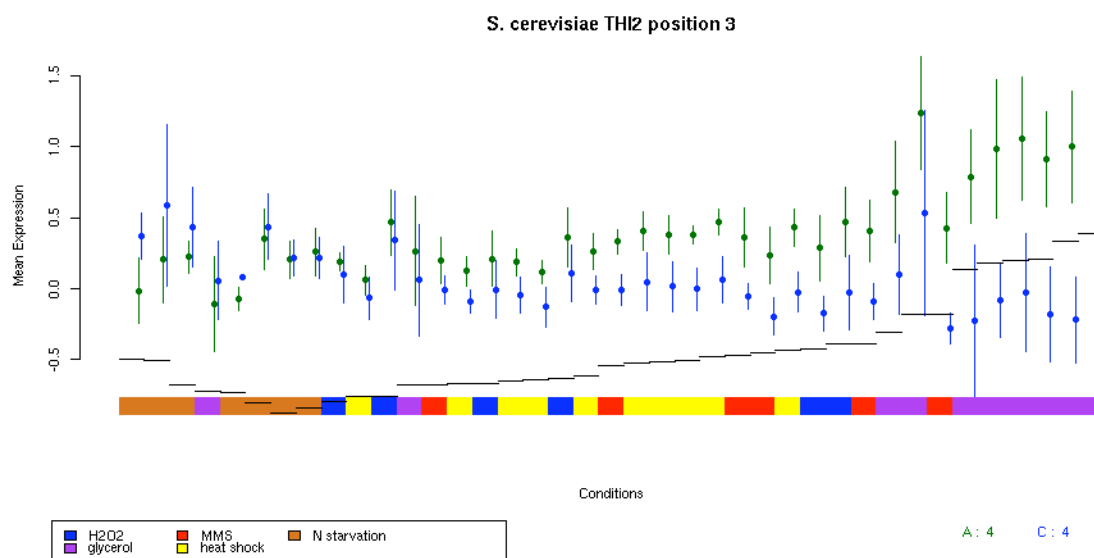



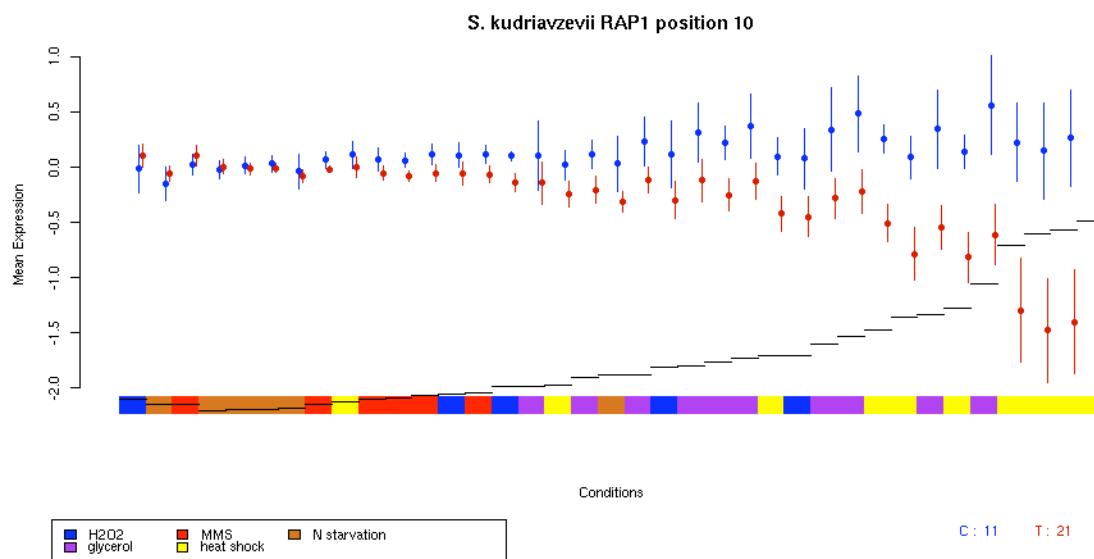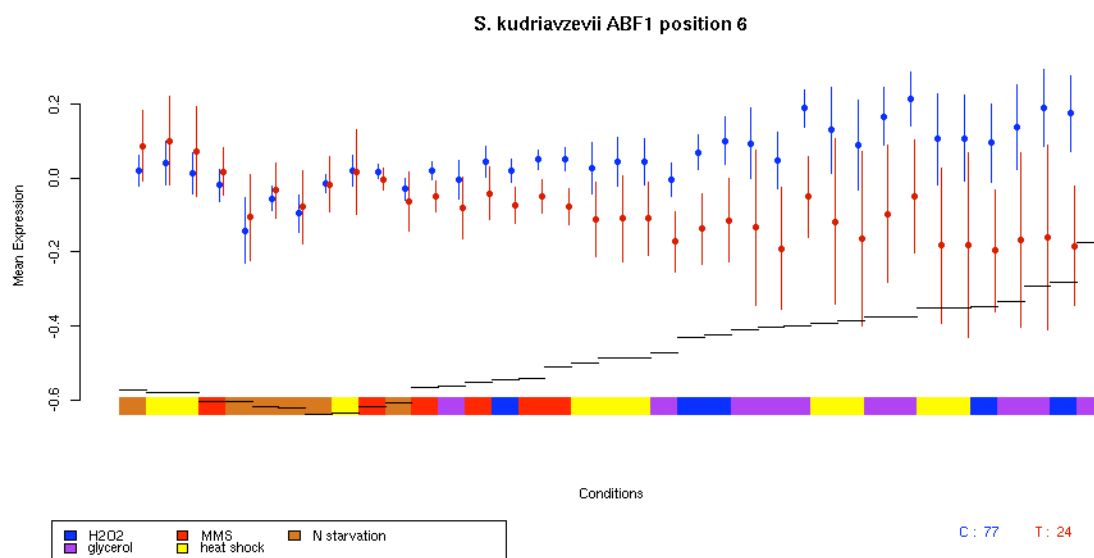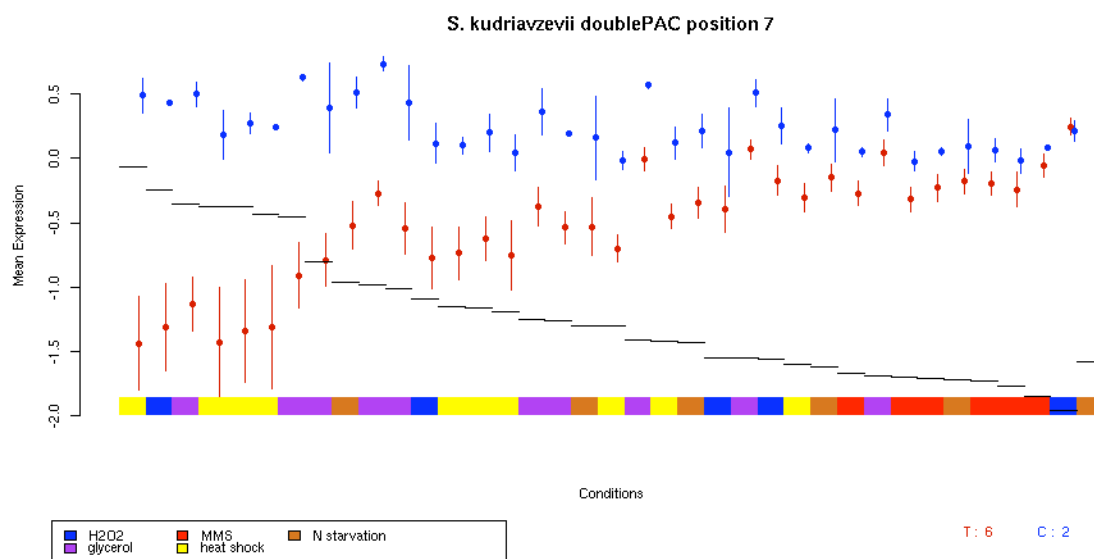

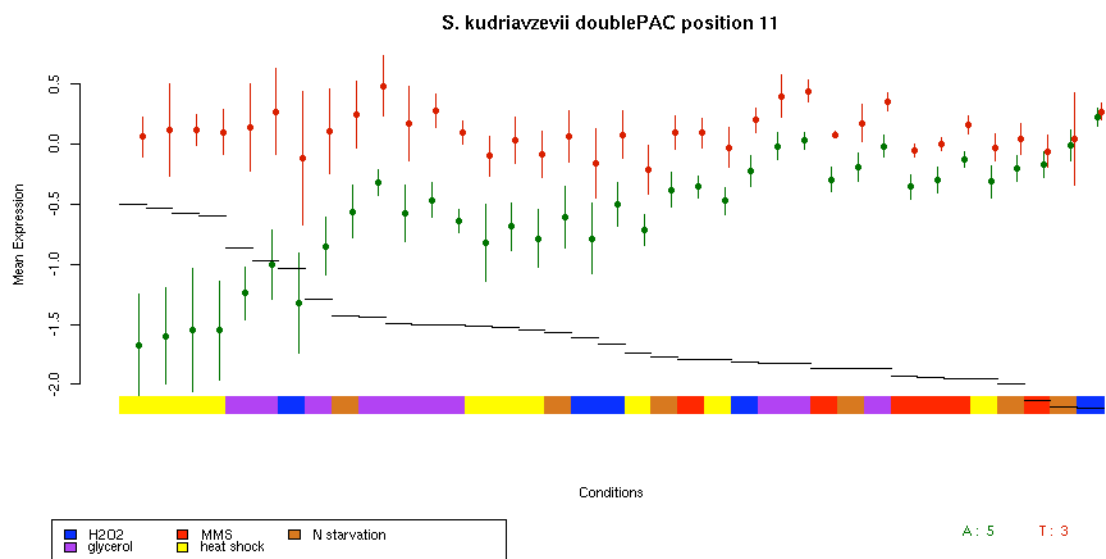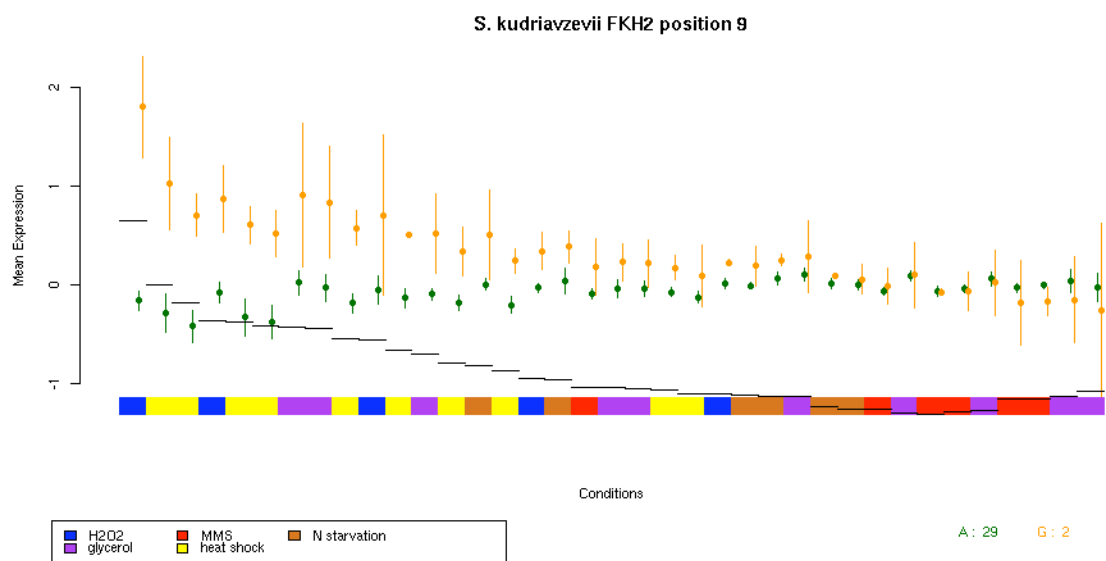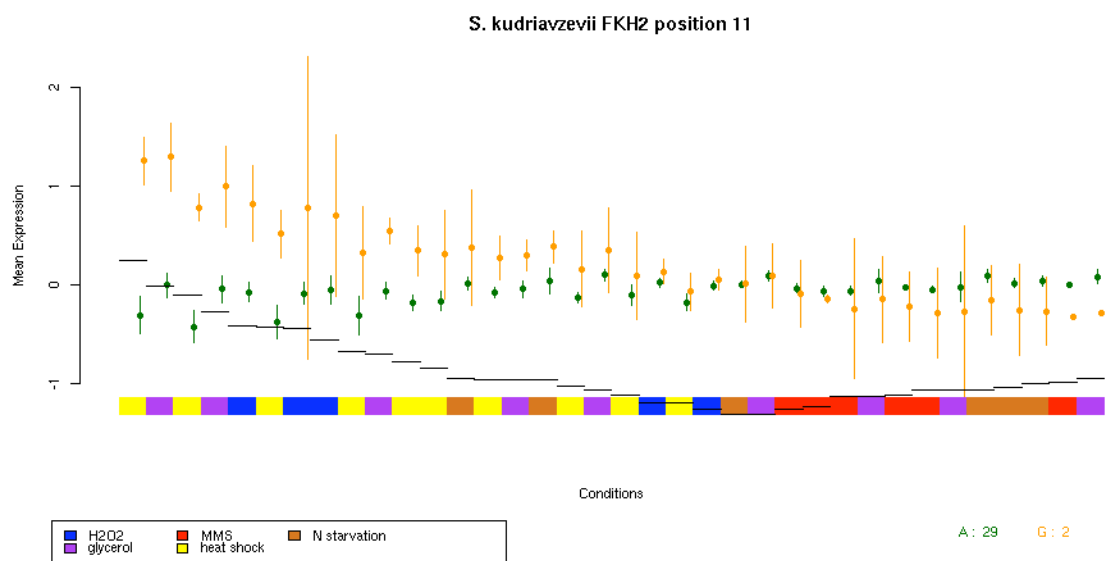

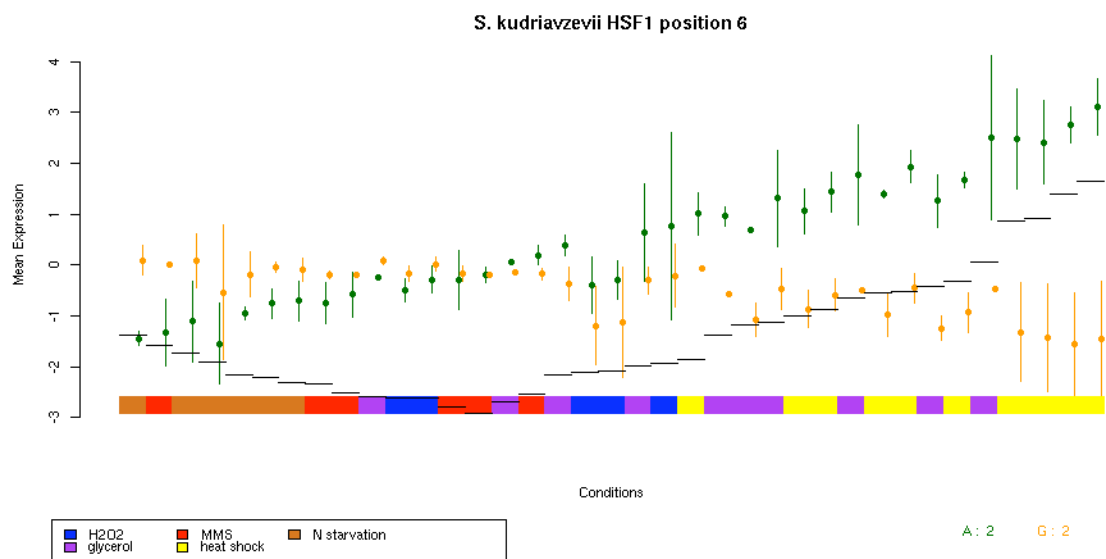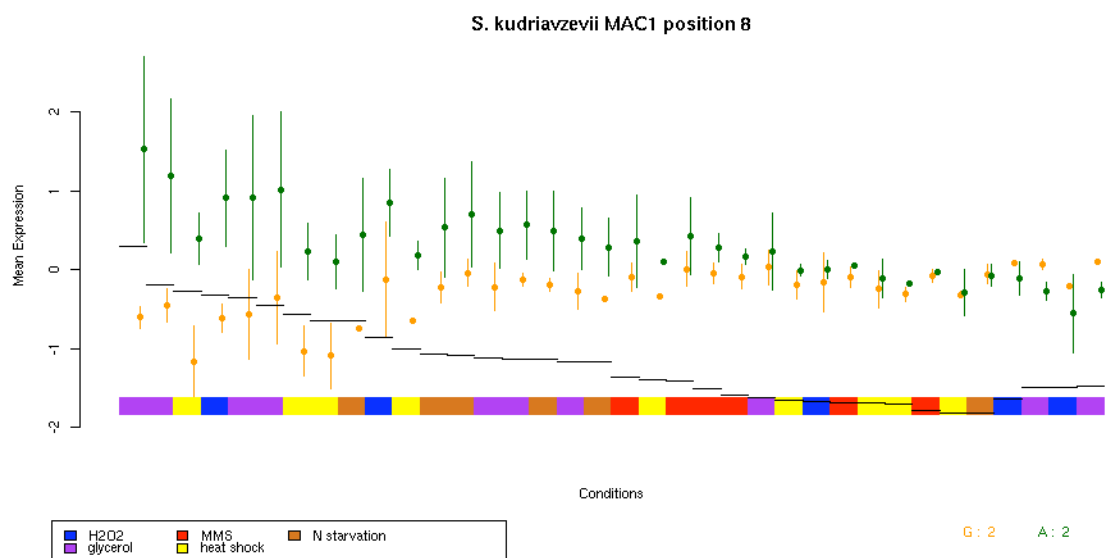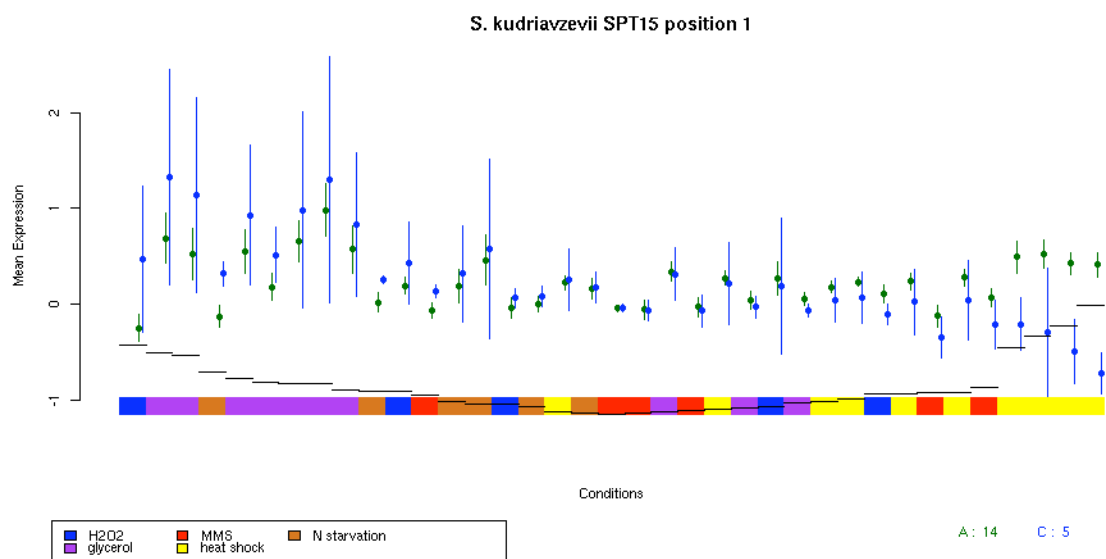

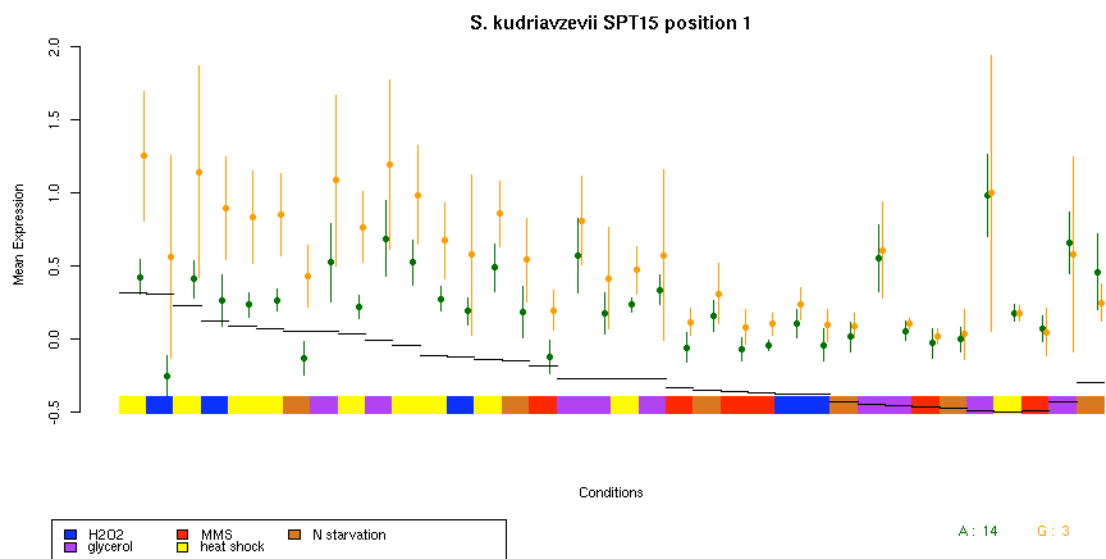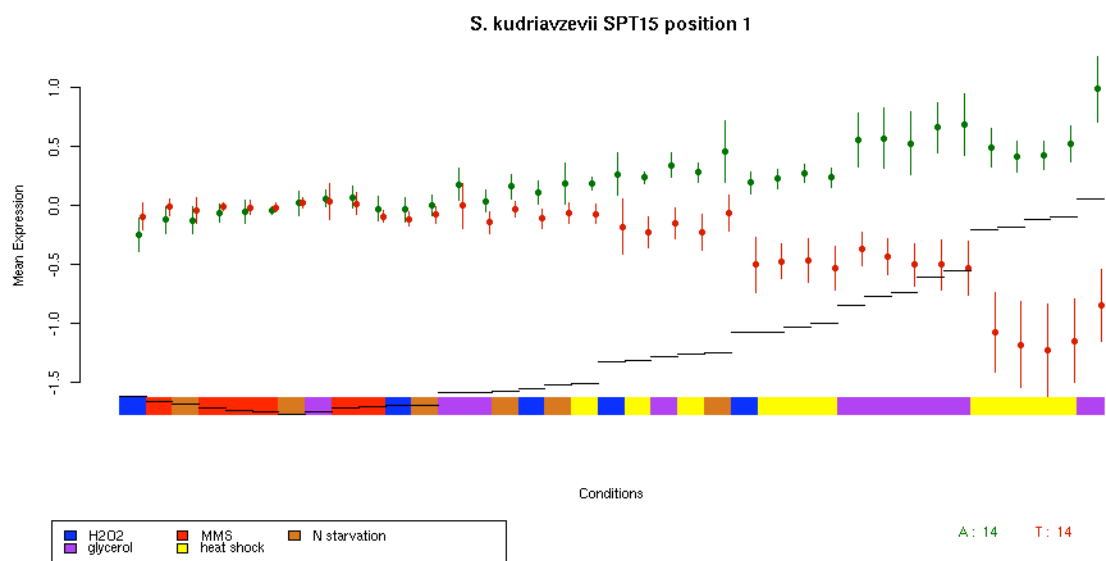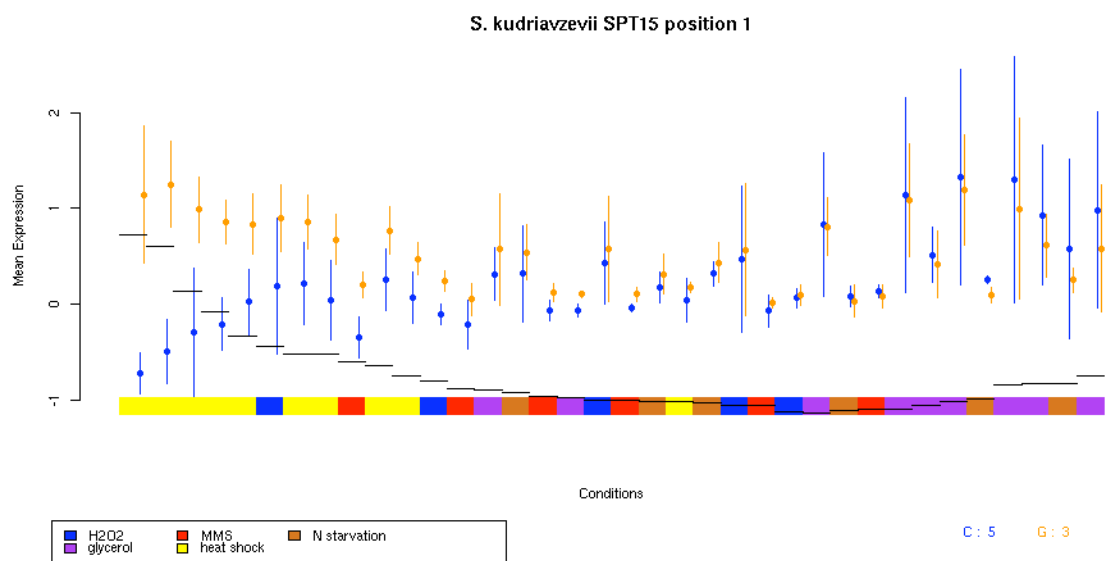

**S. kudriavzevii SPT15 position 1**

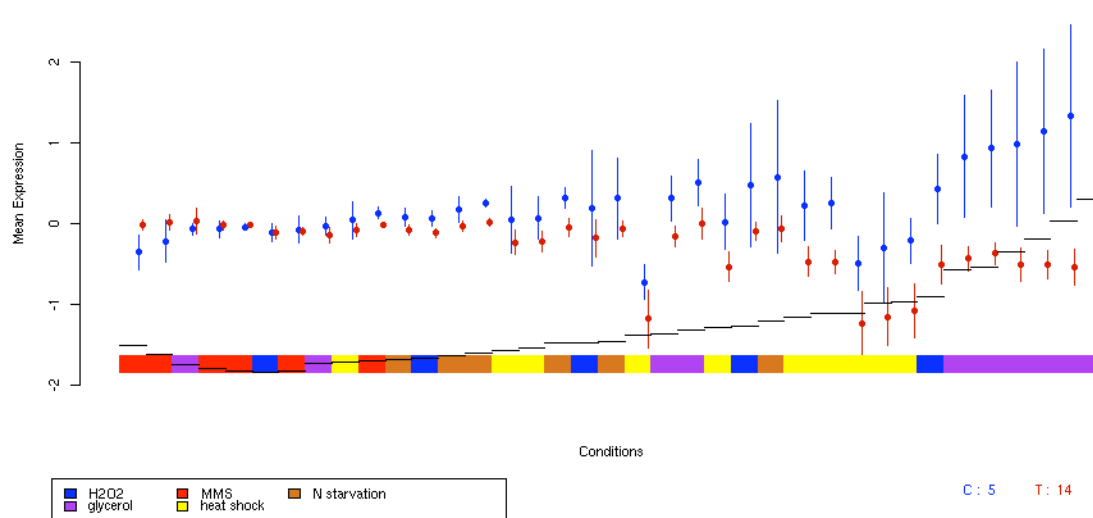

**S. kudriavzevii SPT15 position 1**

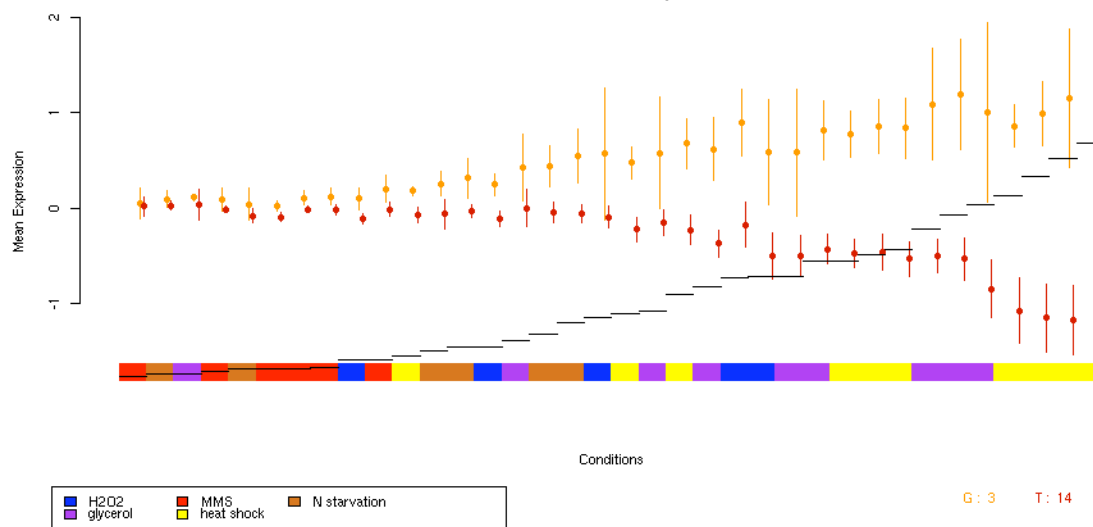

**S. kudriavzevii SPT15 position 10**

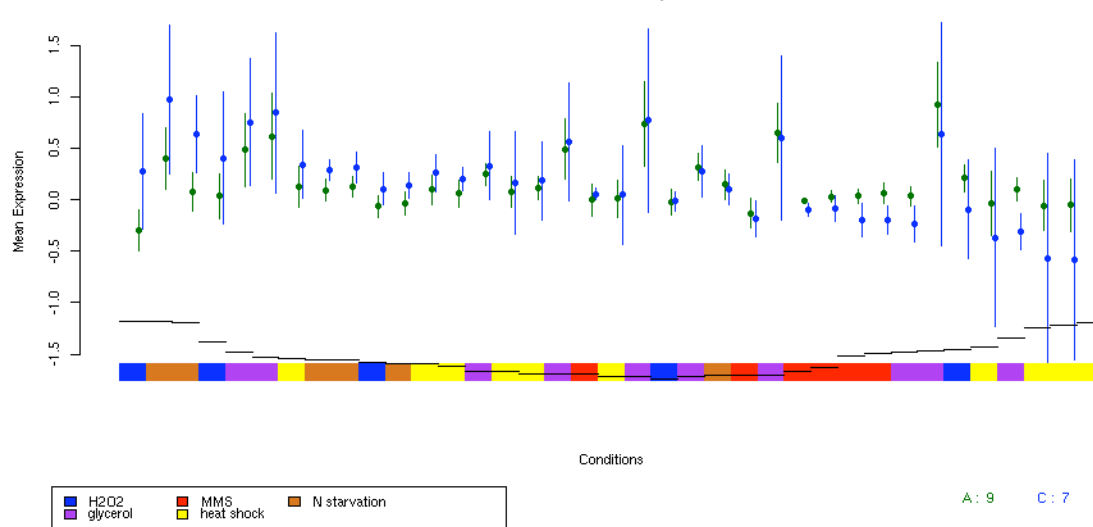

*S. kudriavzevii* SPT15 position 10

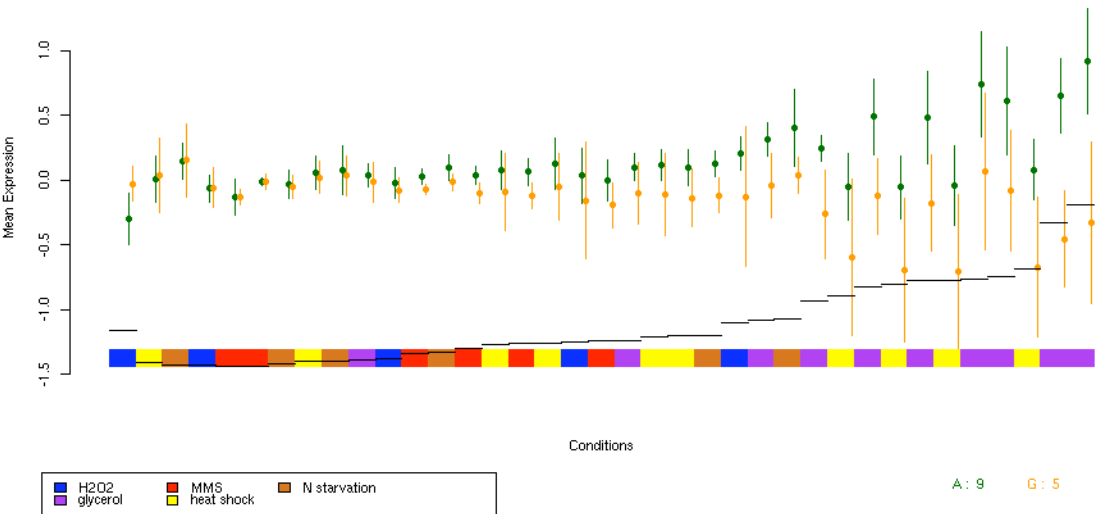

*S. kudriavzevii* SPT15 position 10

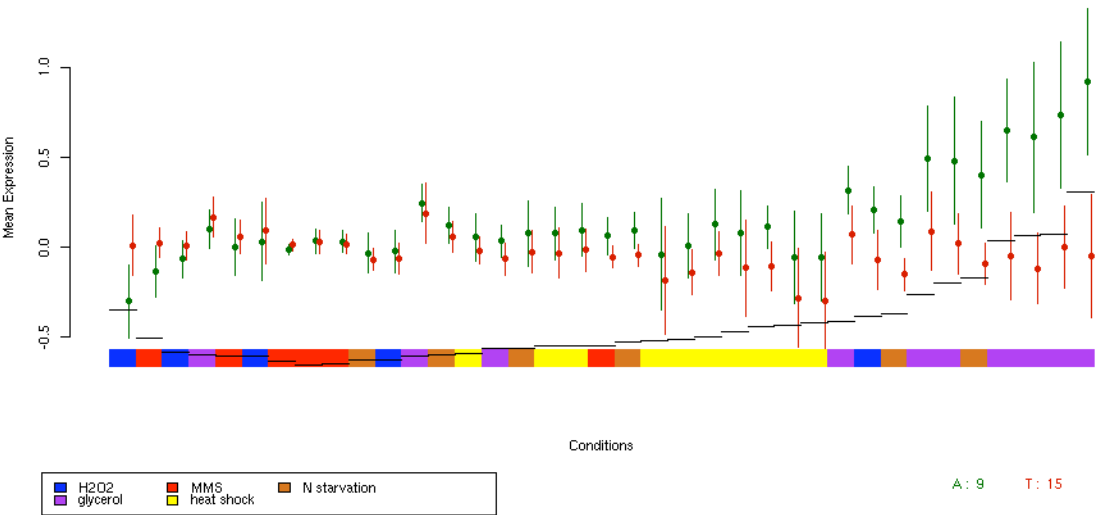

*S. kudriavzevii* SPT15 position 10

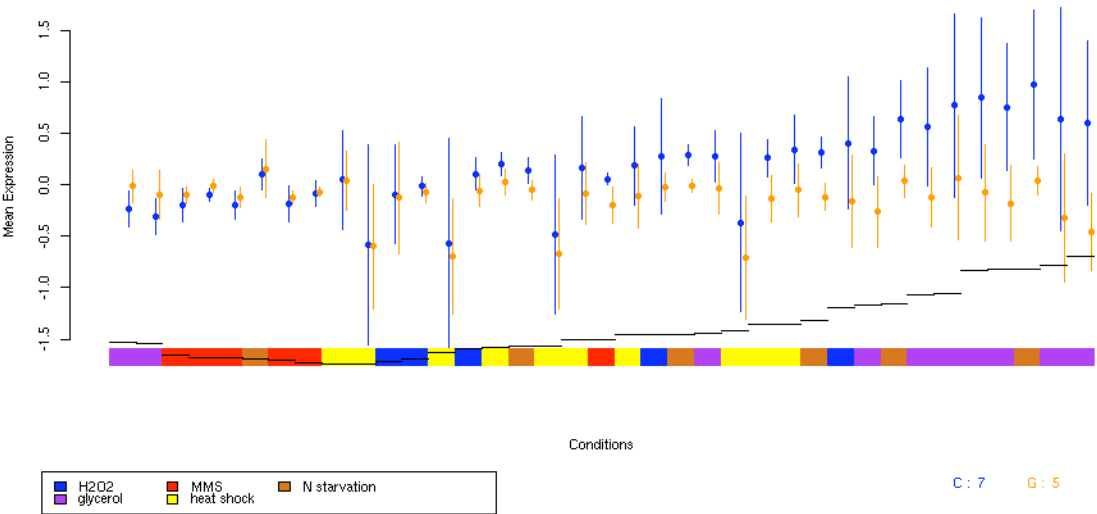

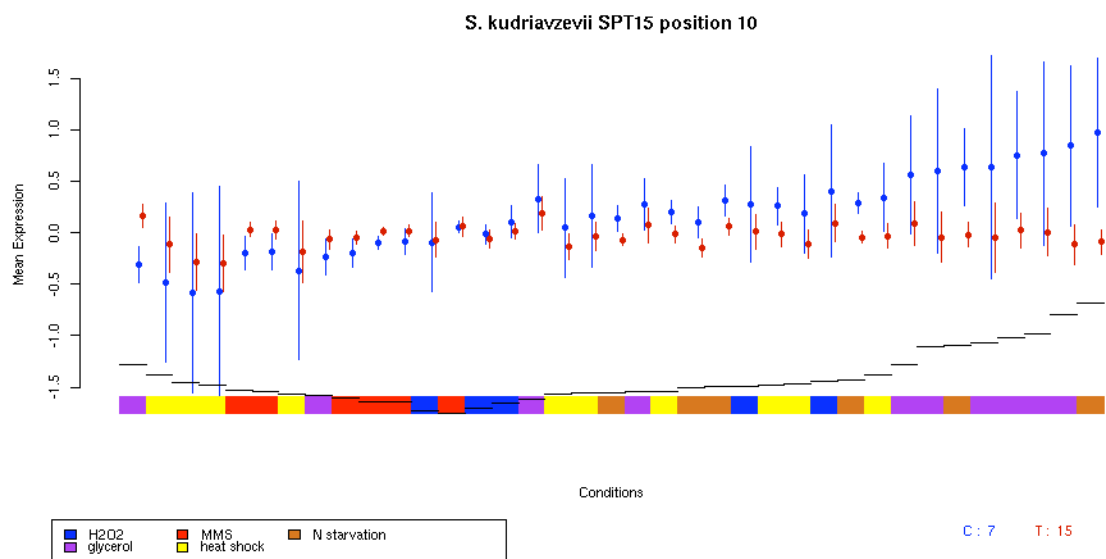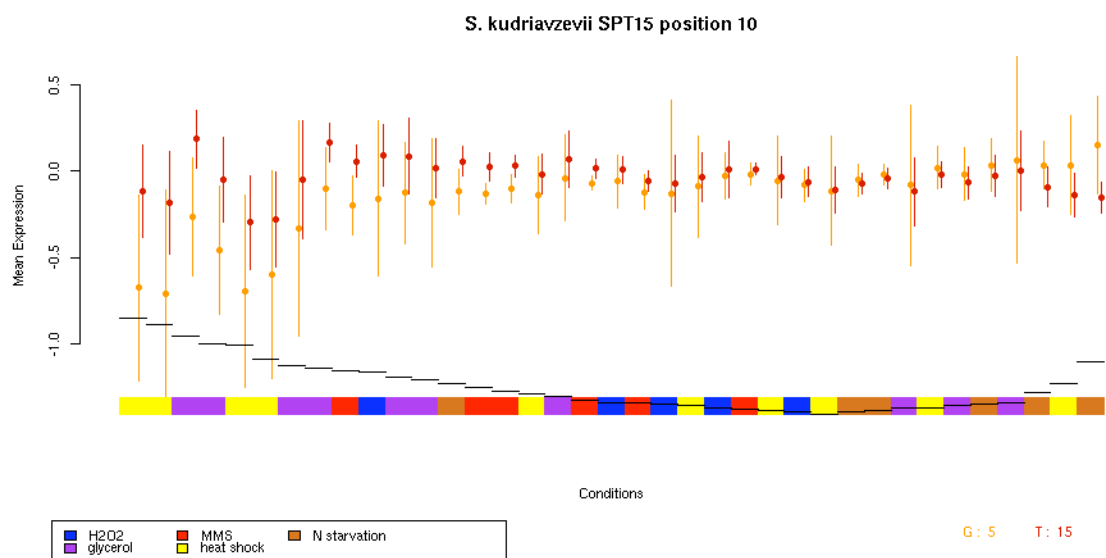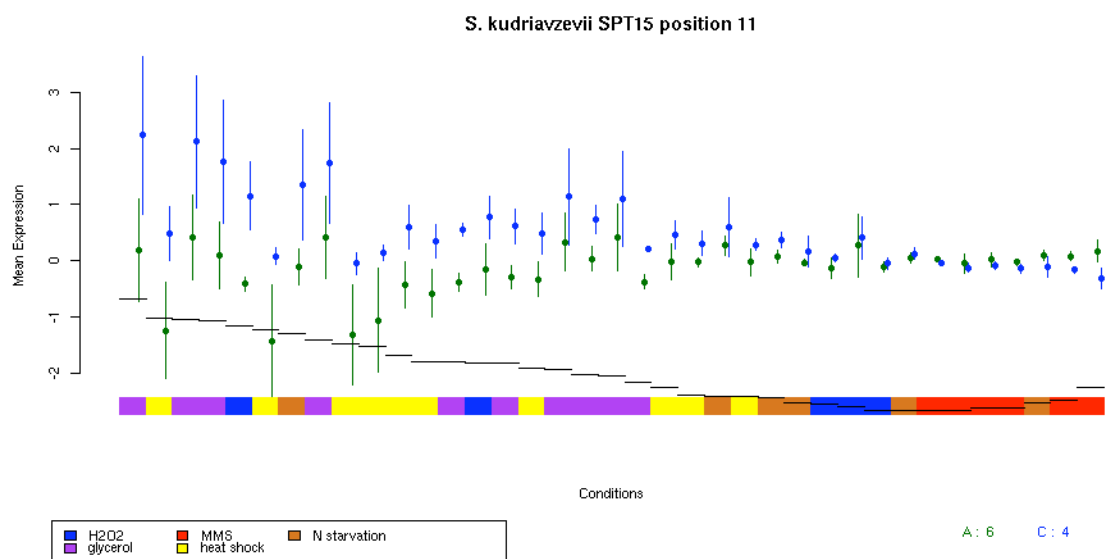

*S. kudriavzevii* SPT15 position 11

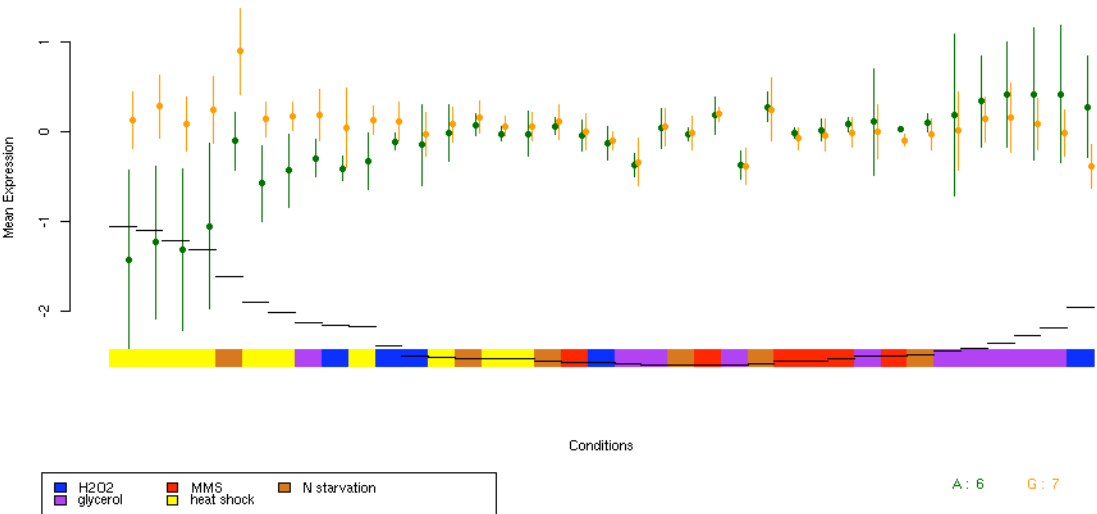

*S. kudriavzevii* SPT15 position 11

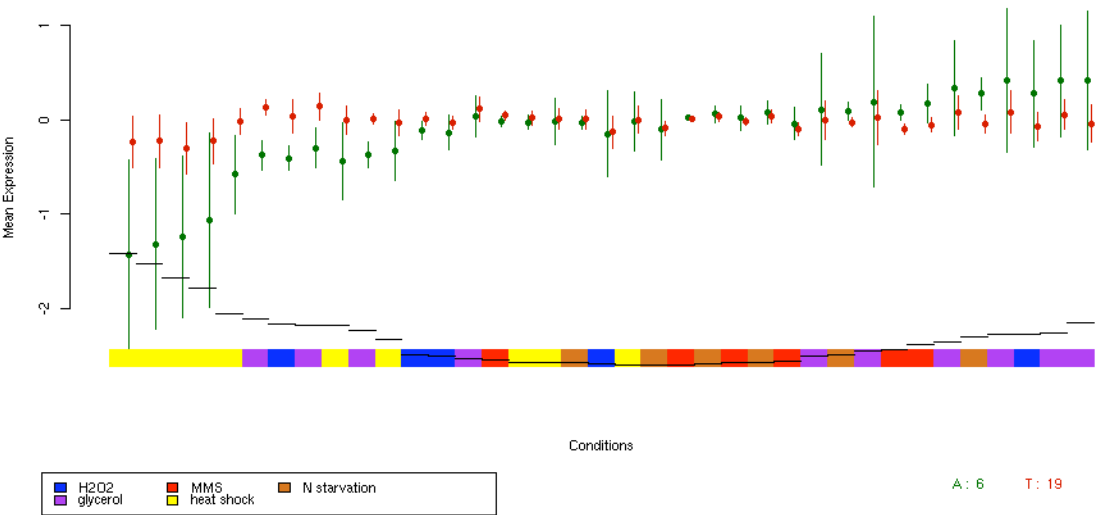

*S. kudriavzevii* SPT15 position 11

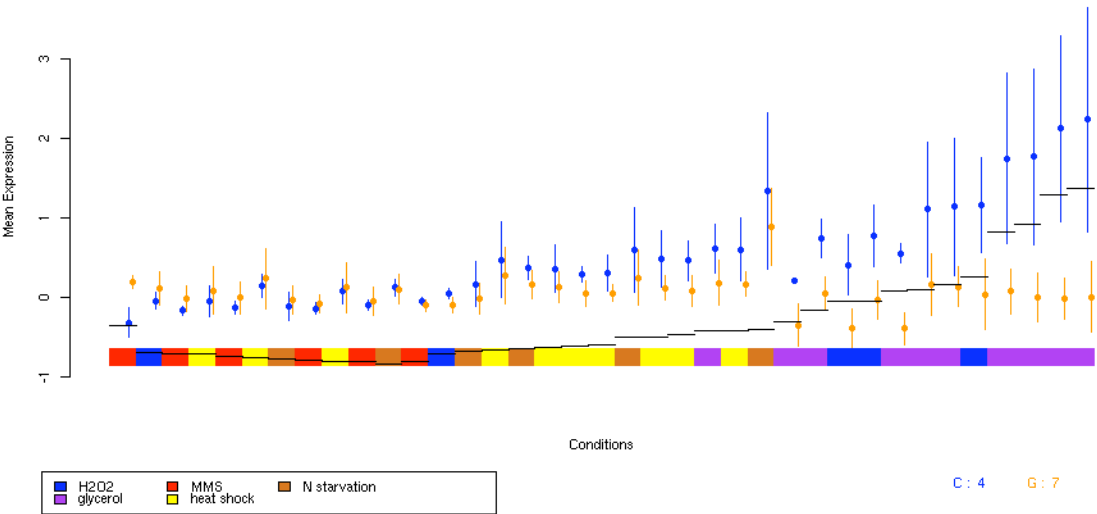



S. kudriavzevii SPT15 position 11

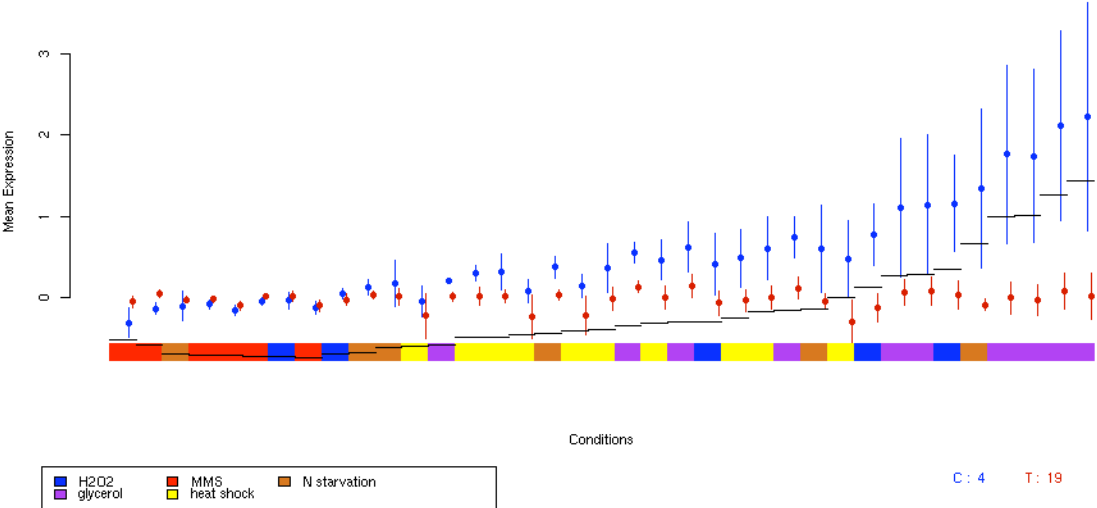

S. kudriavzevii SPT15 position 11

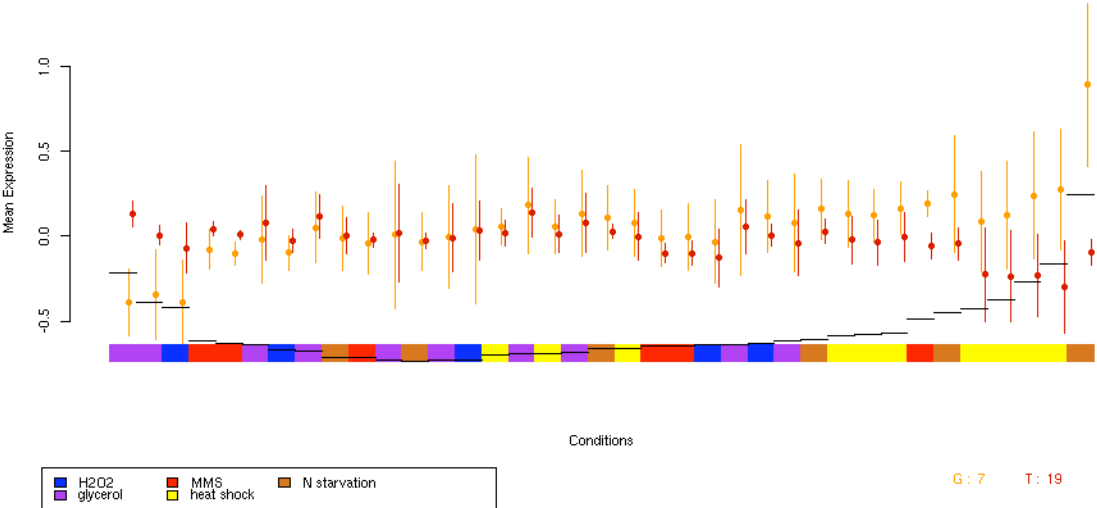

S. kudriavzevii STB5 position 6

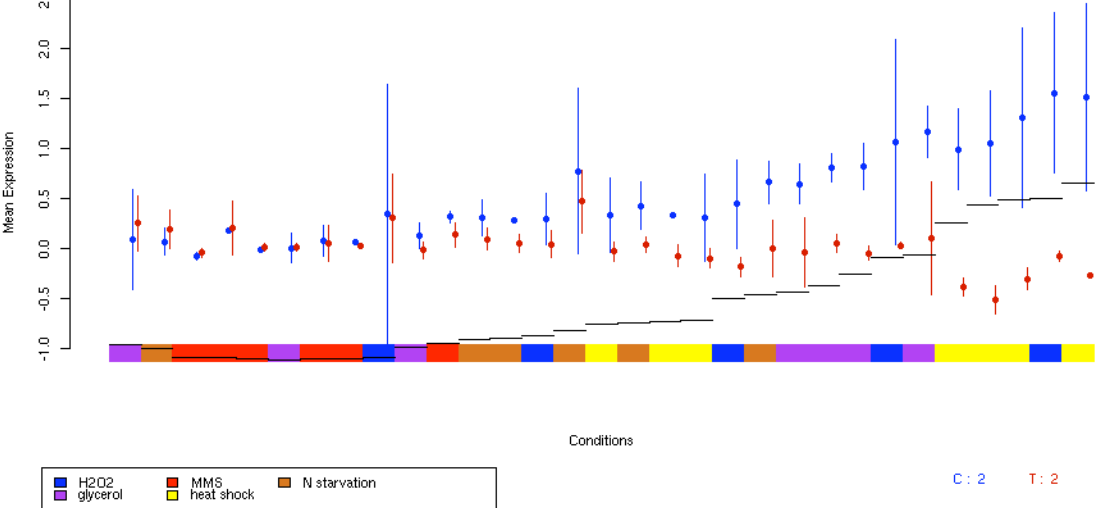

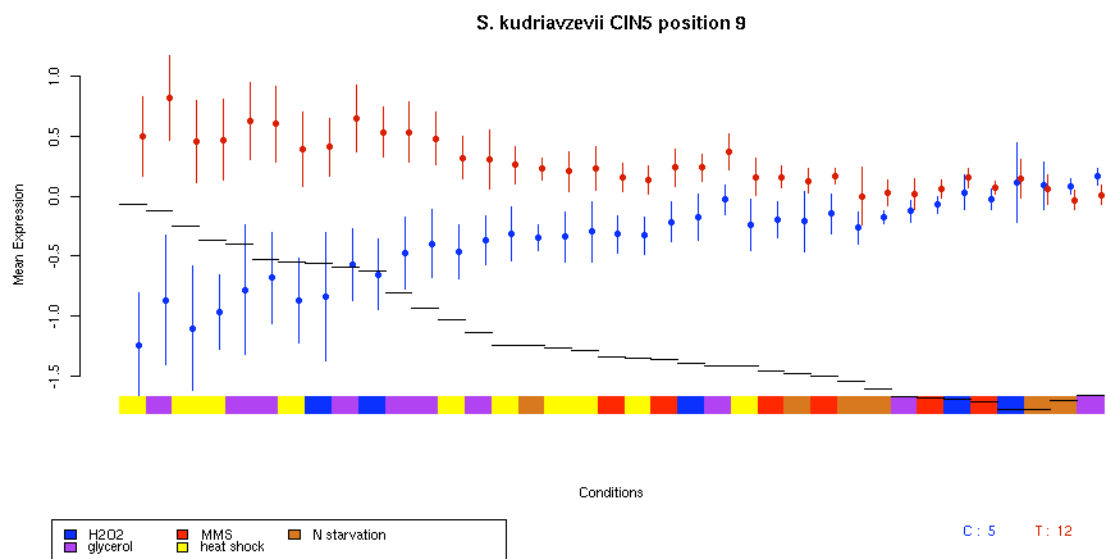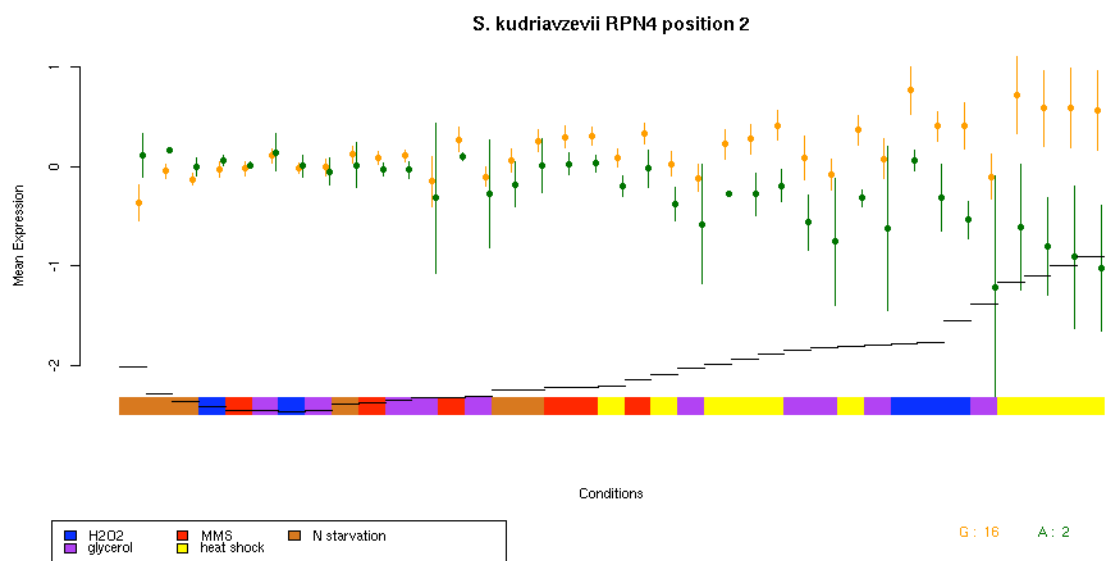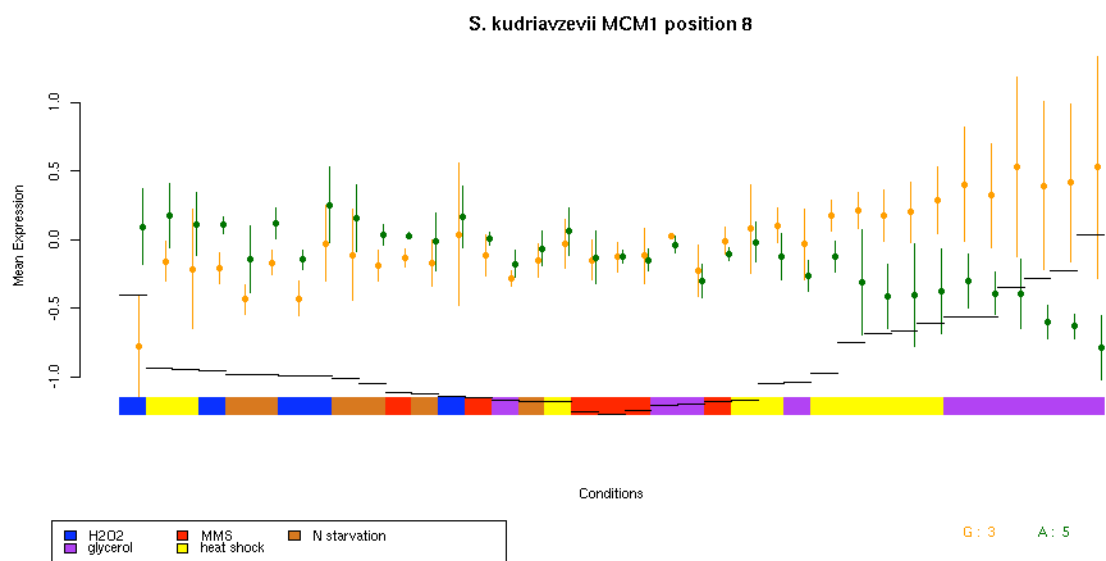

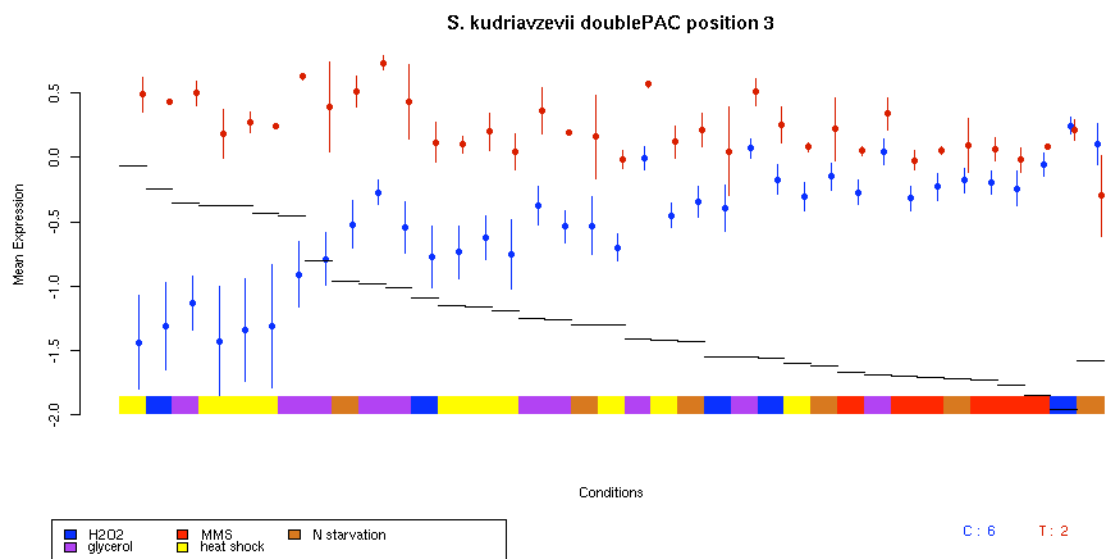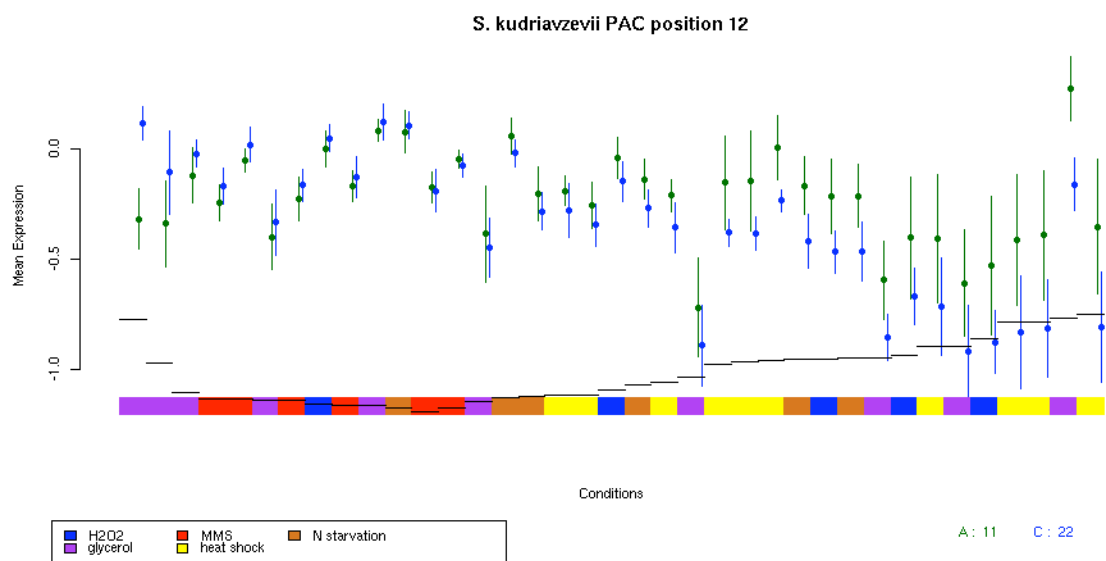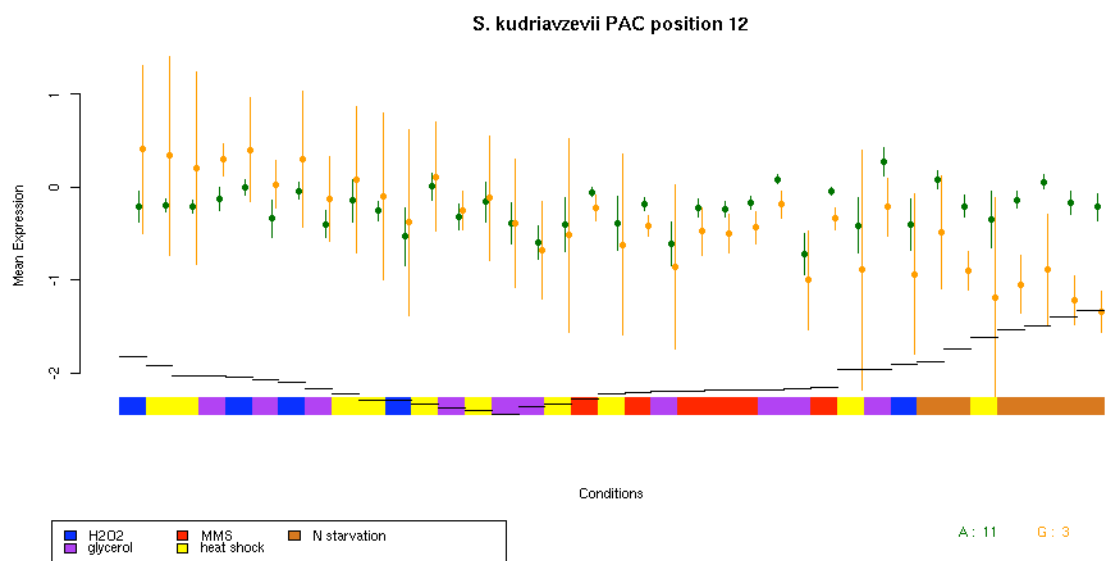

### S. kudriavzevii PAC position 12

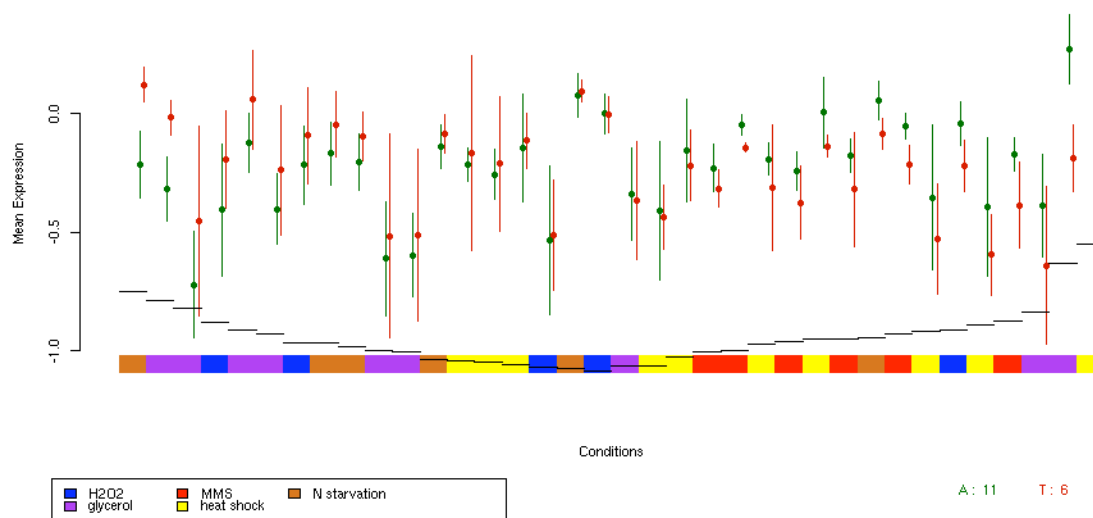

### S. kudriavzevii PAC position 12

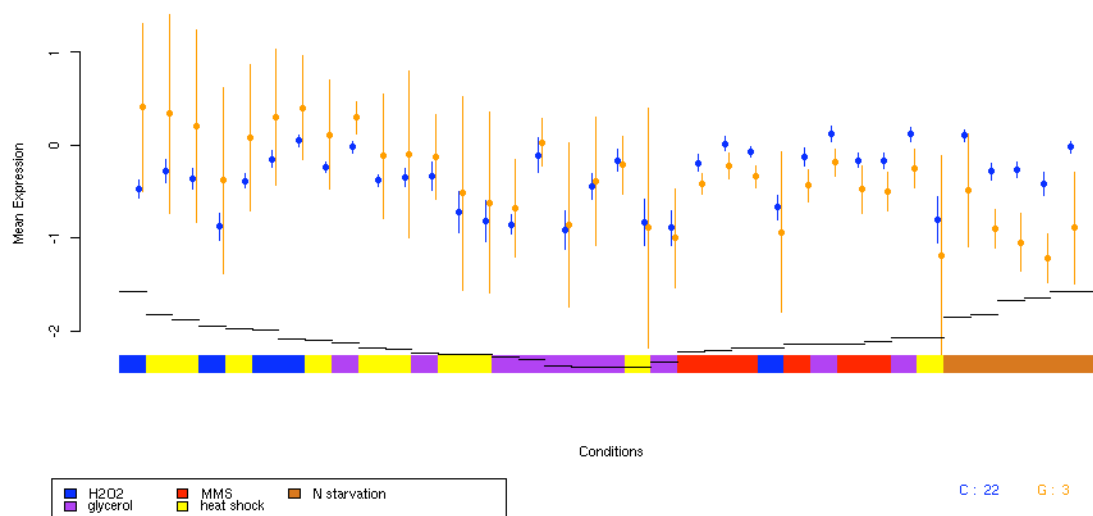

S. kudriavzevii PAC position 12

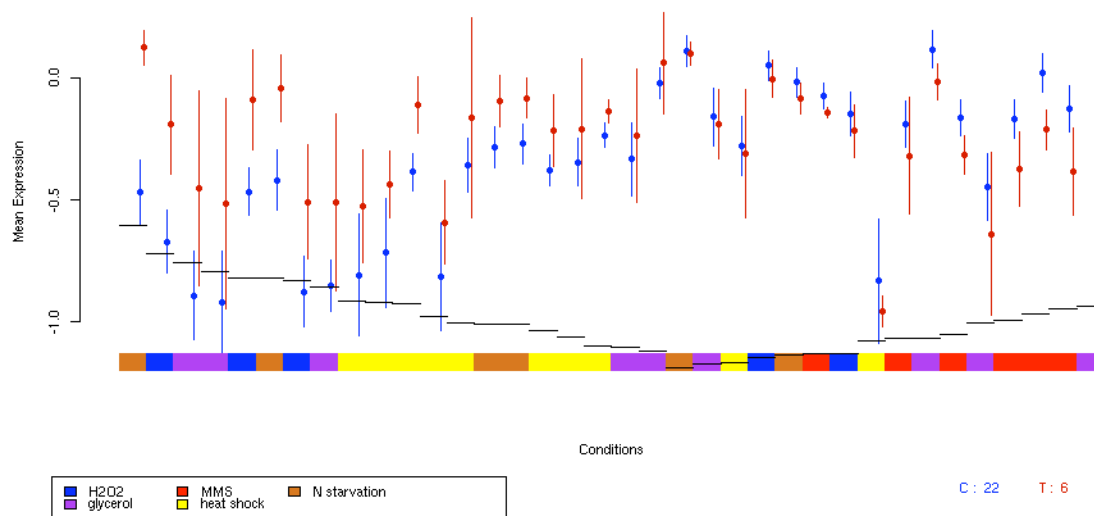

S. kudriavzevii PAC position 12

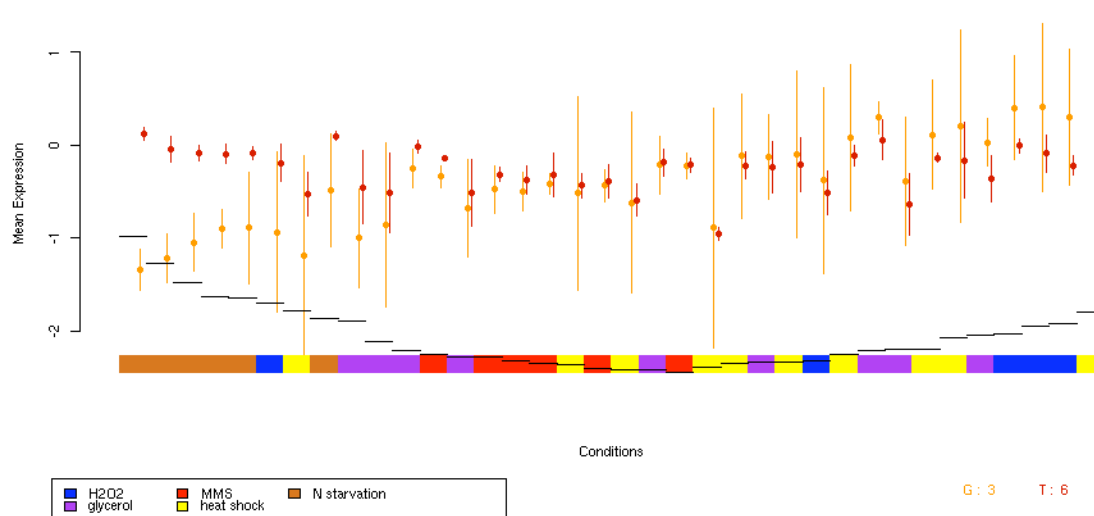

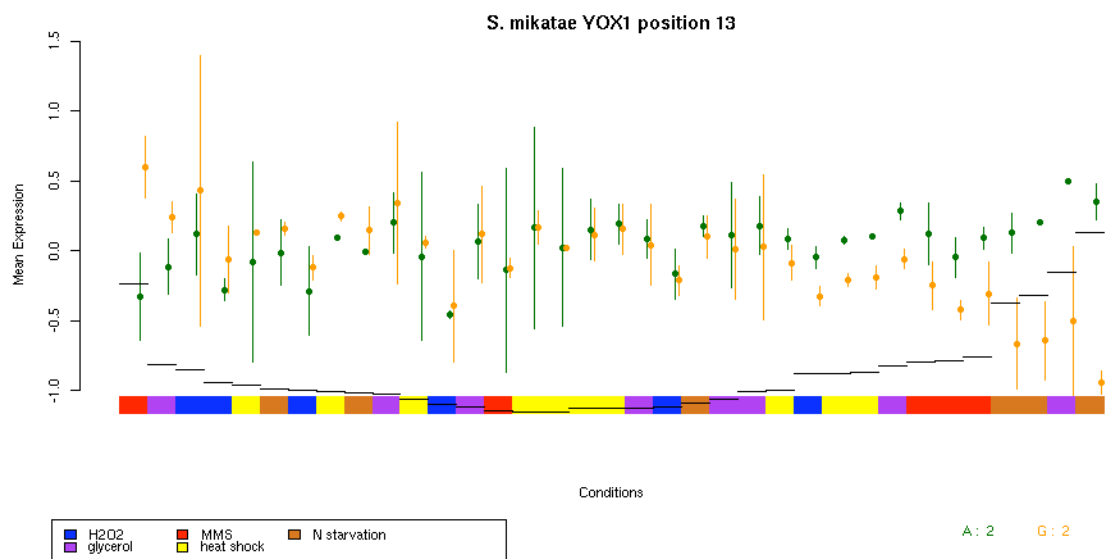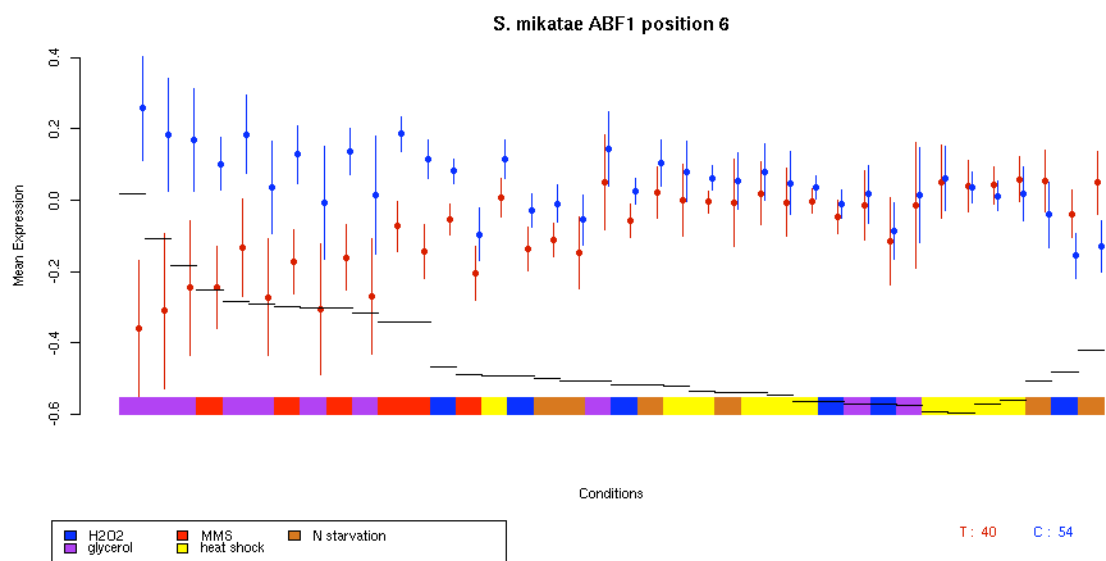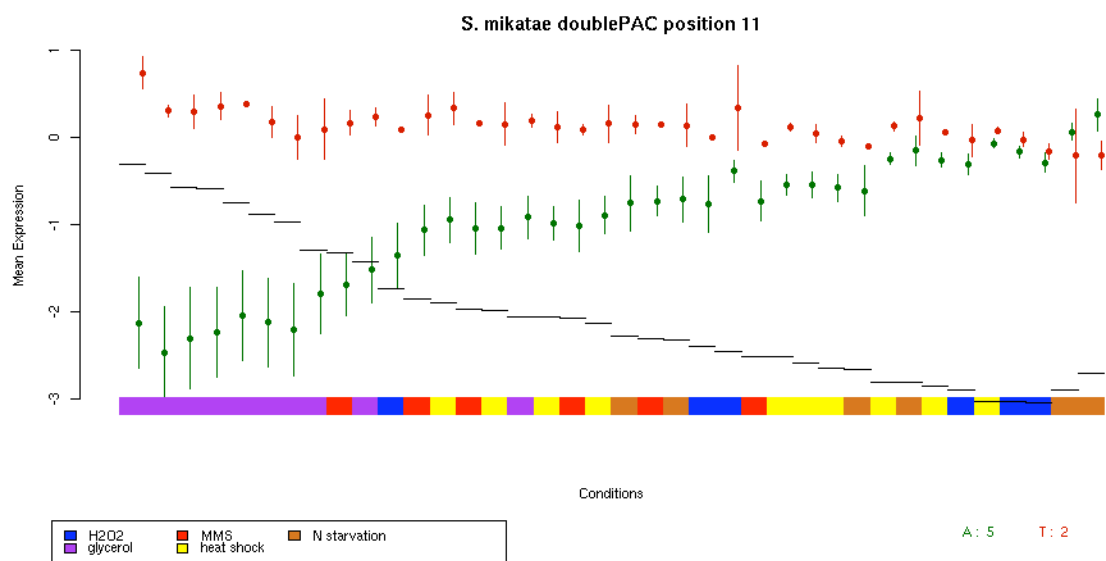

**S. mikatae MBP1 position 1**

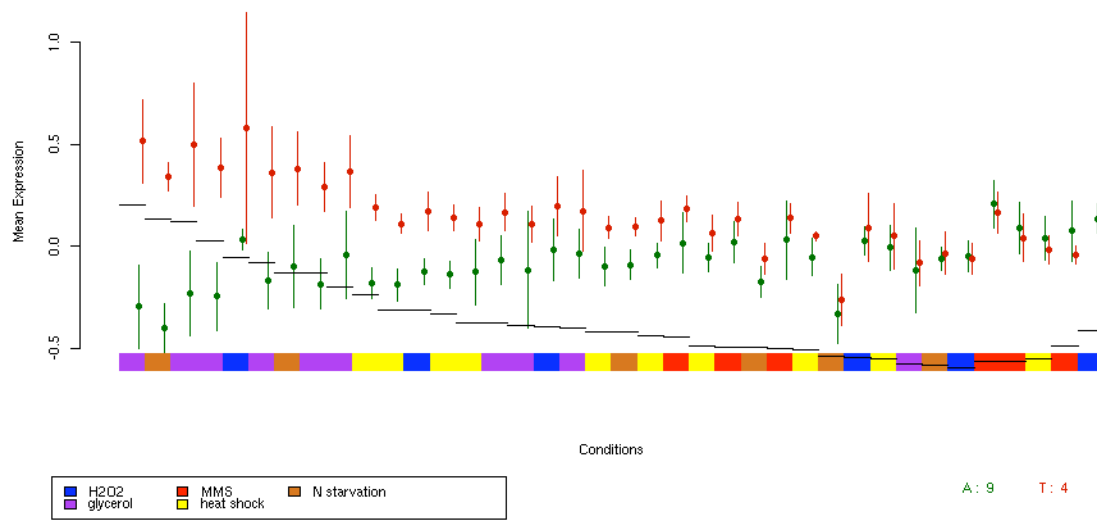

**S. mikatae MCM1 position 6**

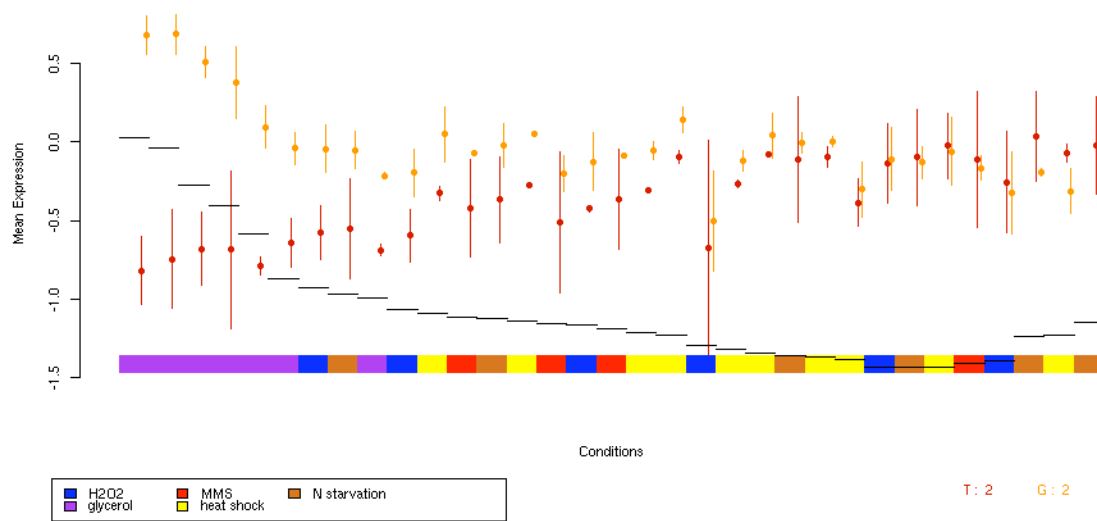

**S. mikatae PAC position 6**

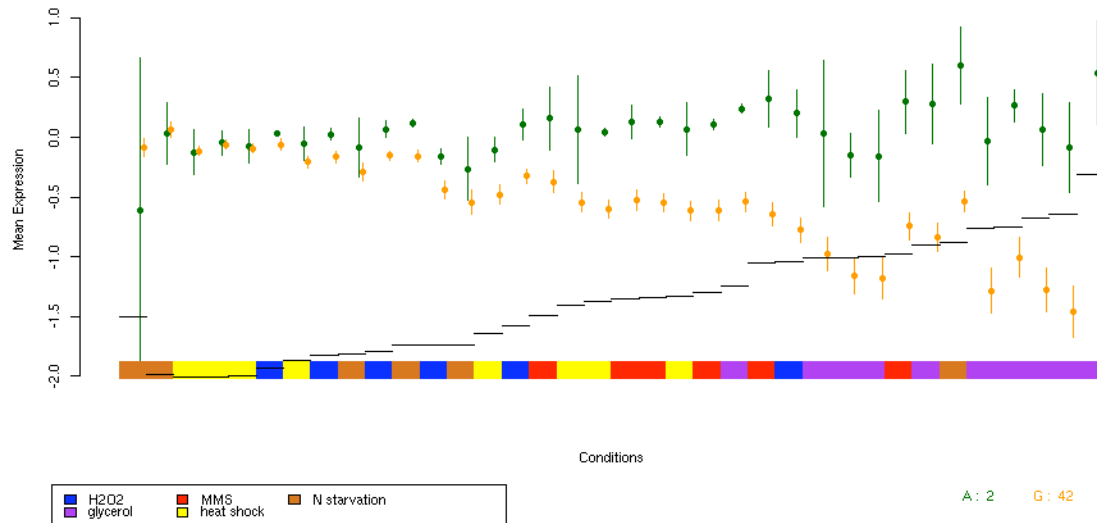

**S. mikatae RAP1 position 10**

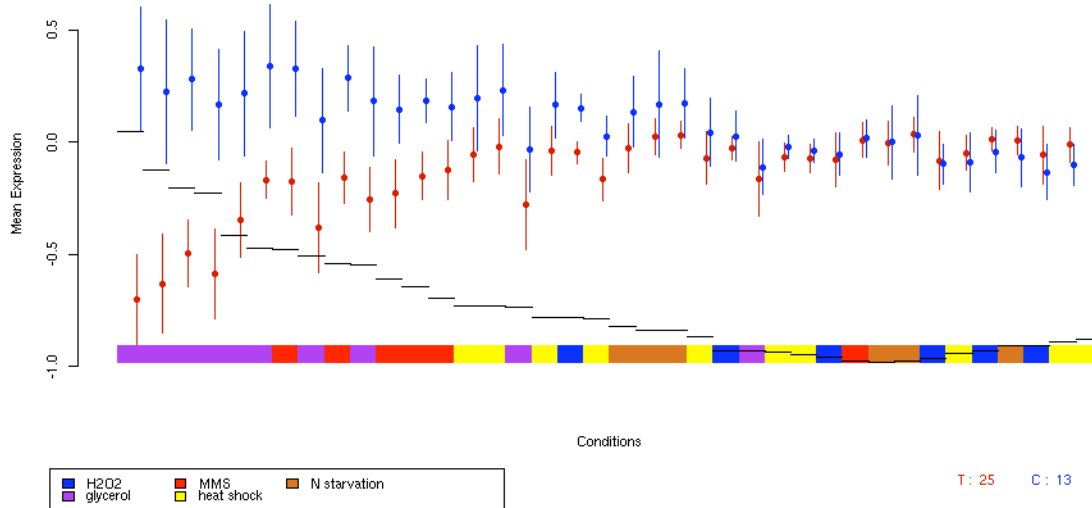

**S. mikatae RCS1 position 8**

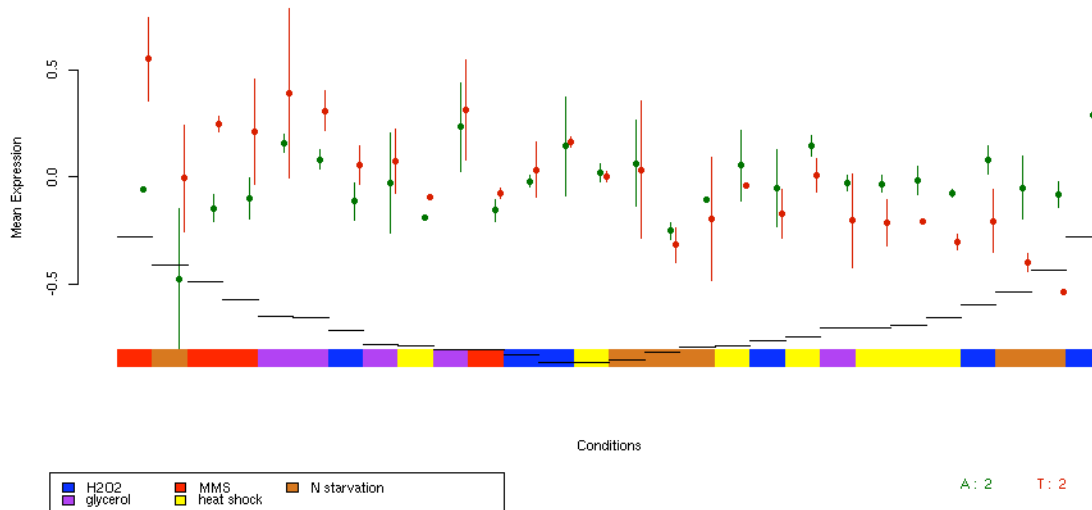

**S. mikatae REB1 position 9**

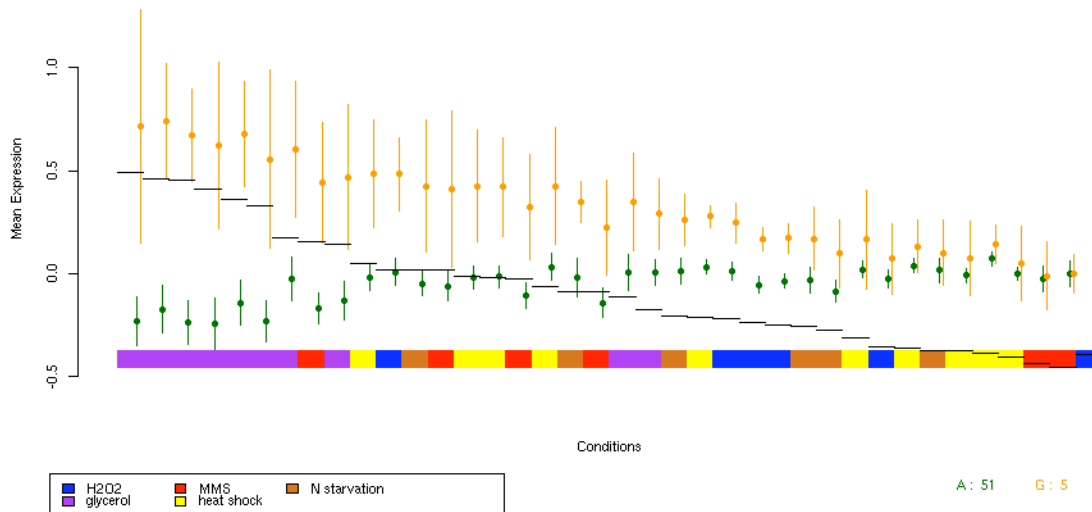



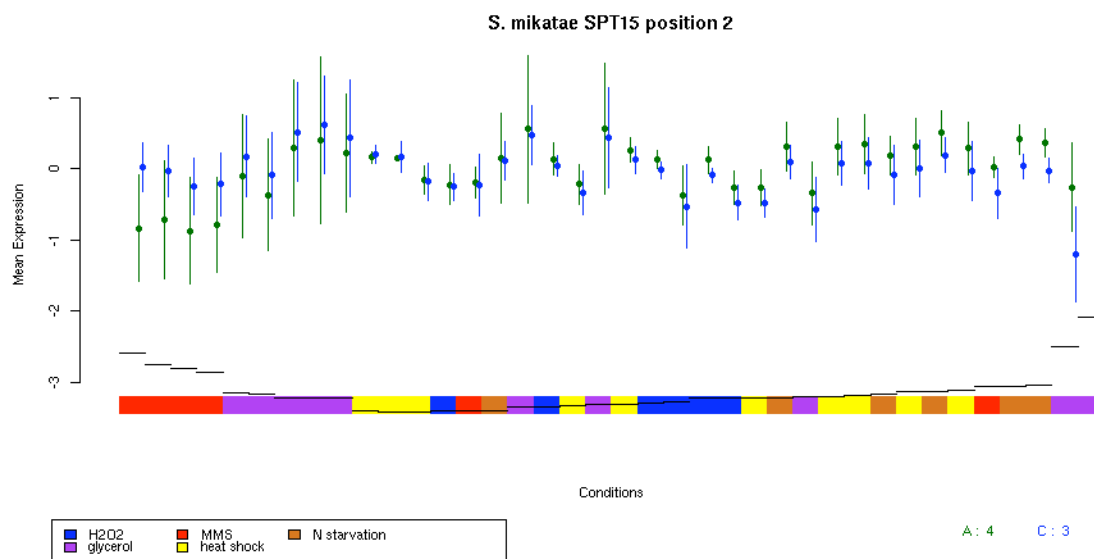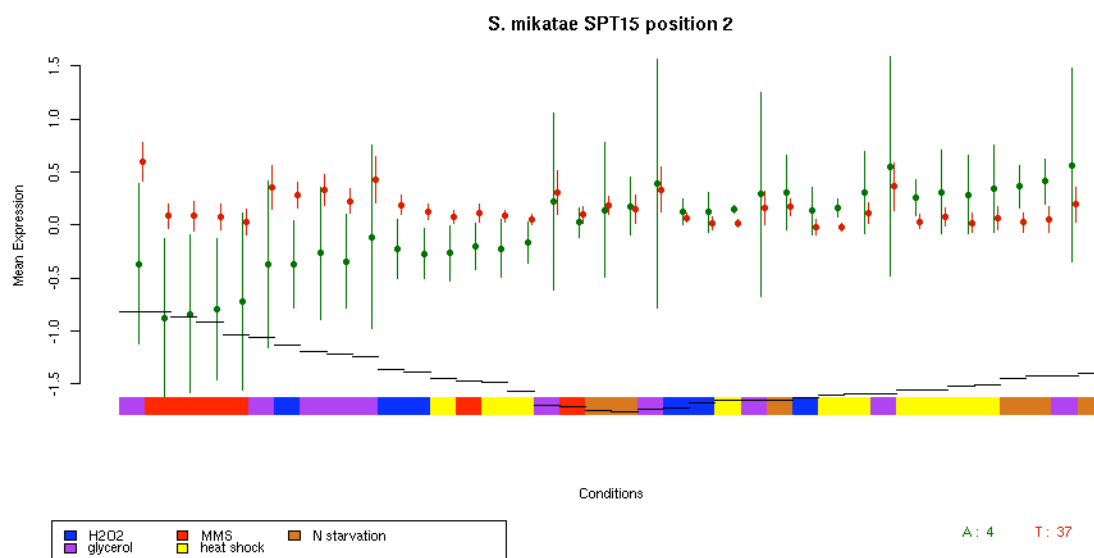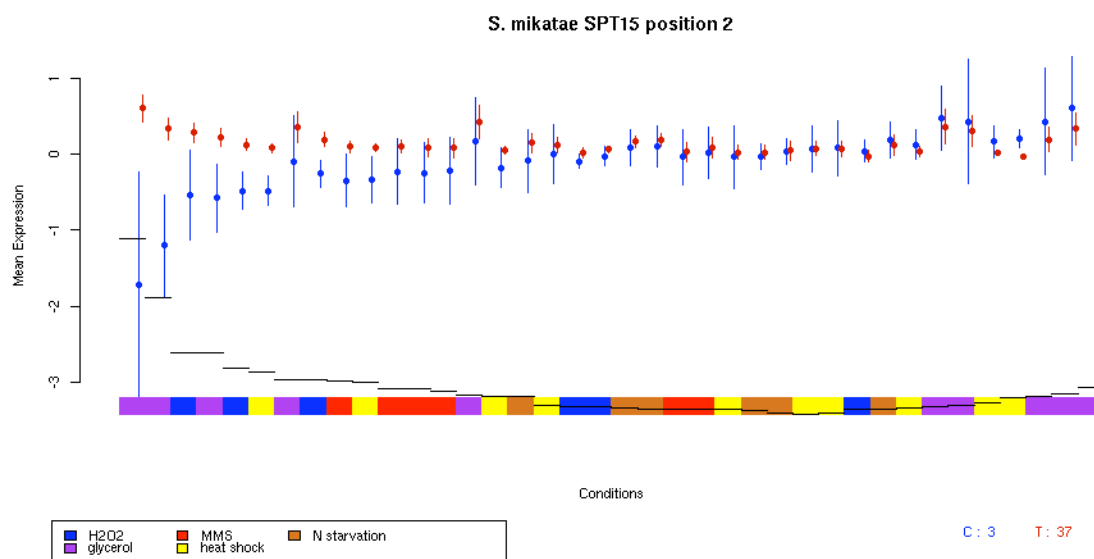

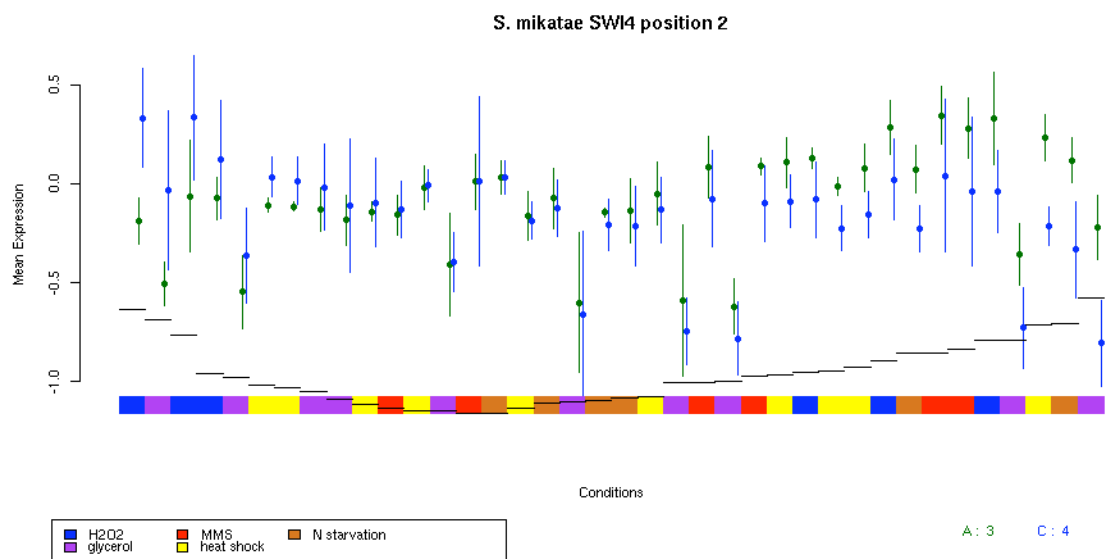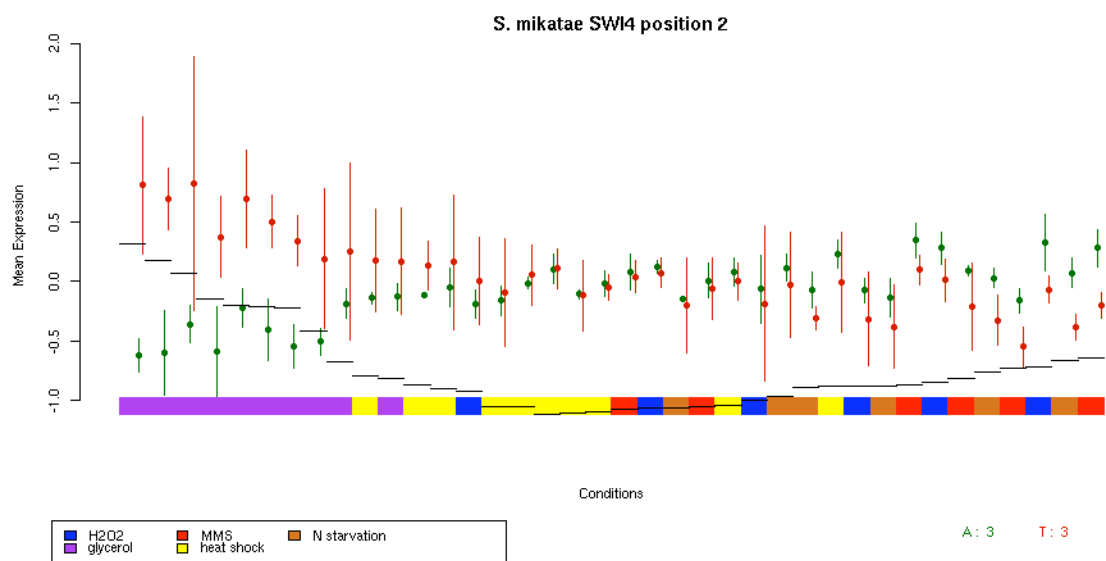

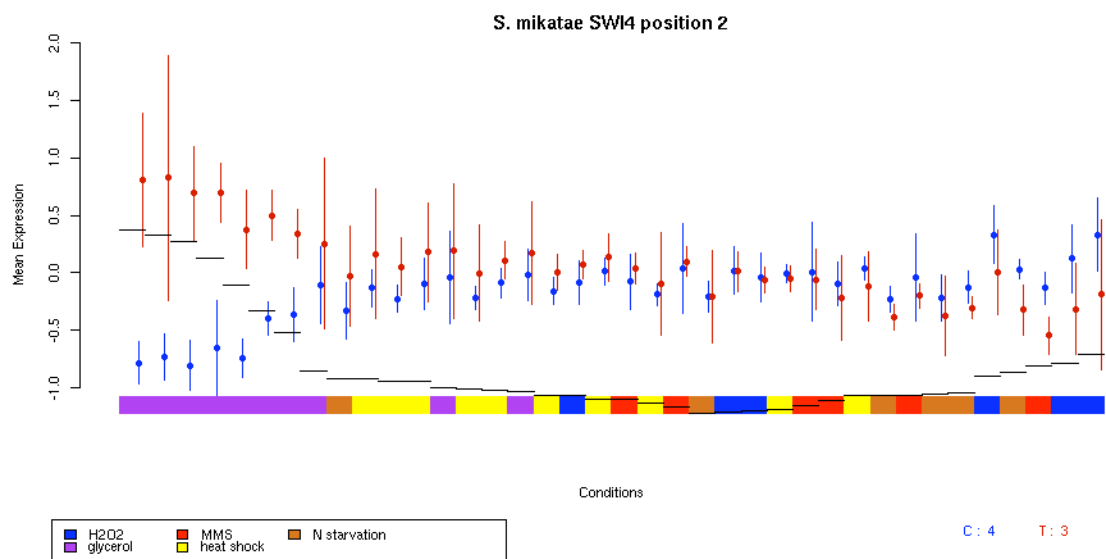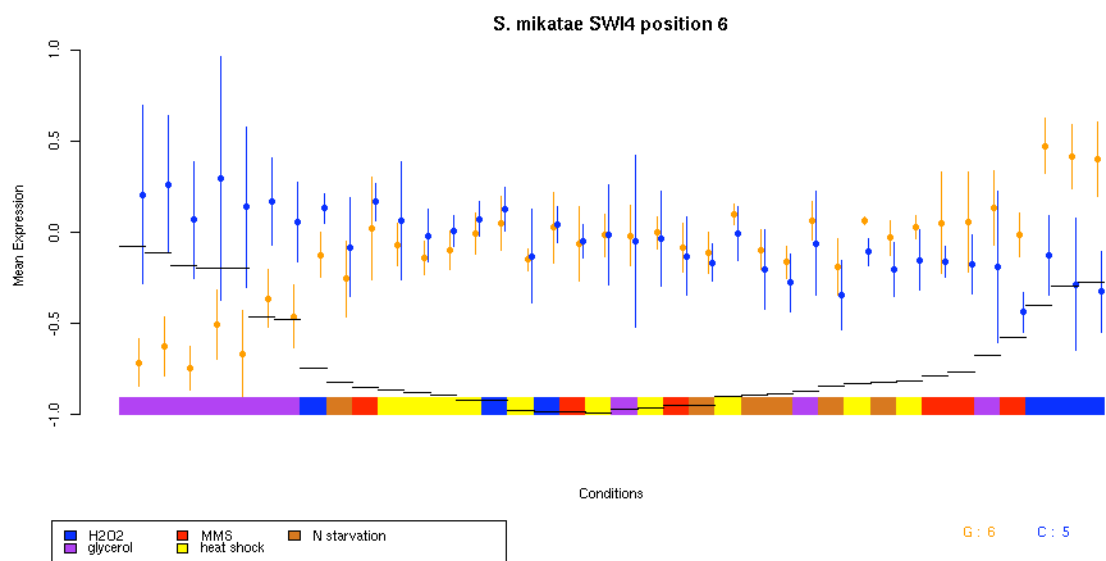

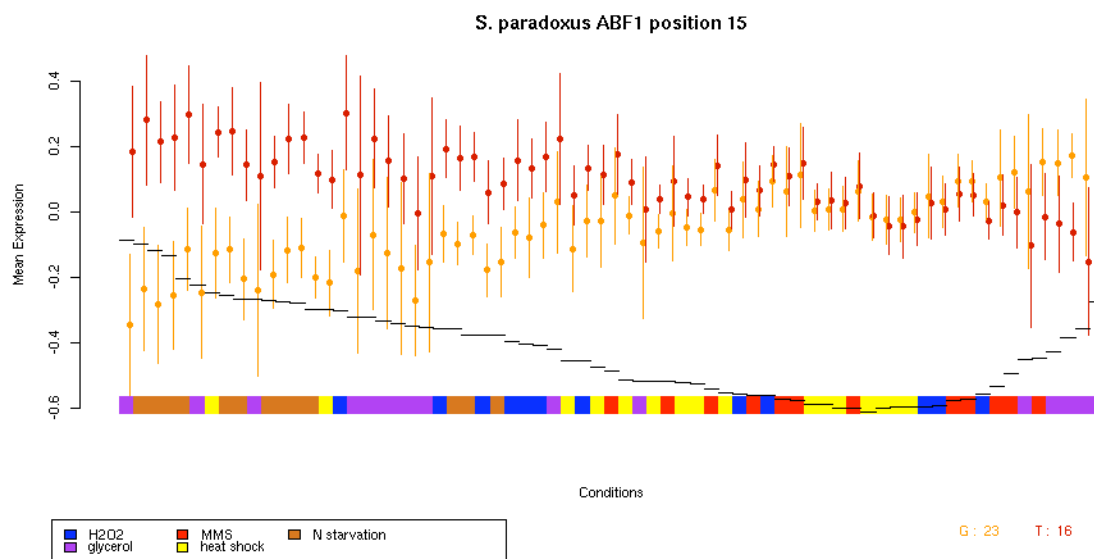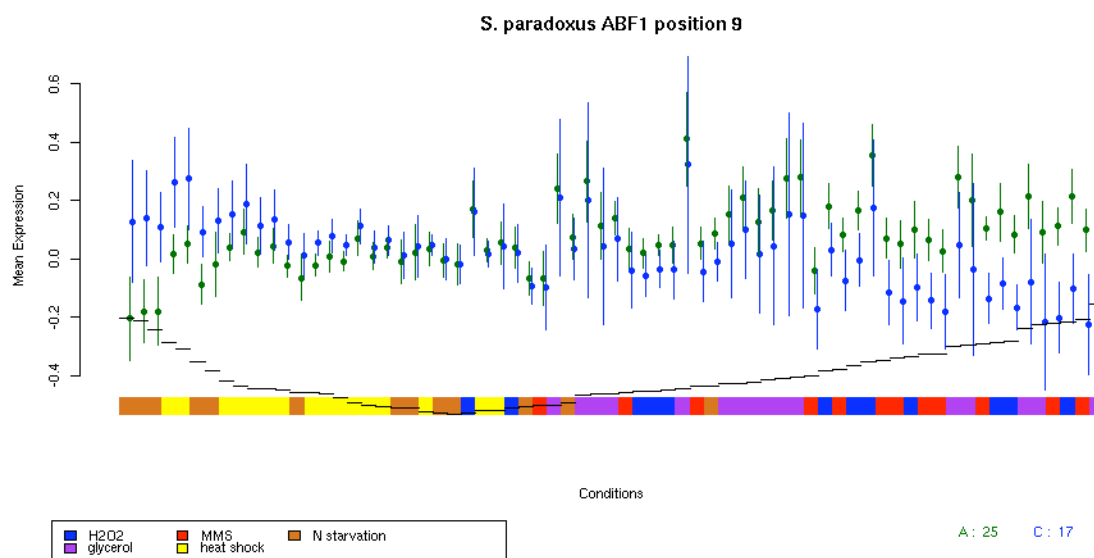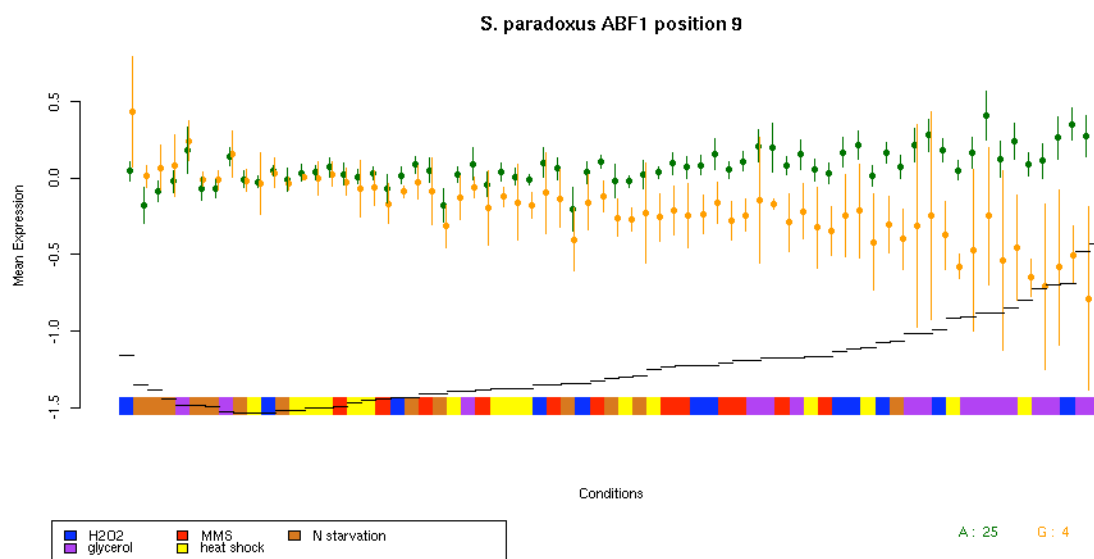

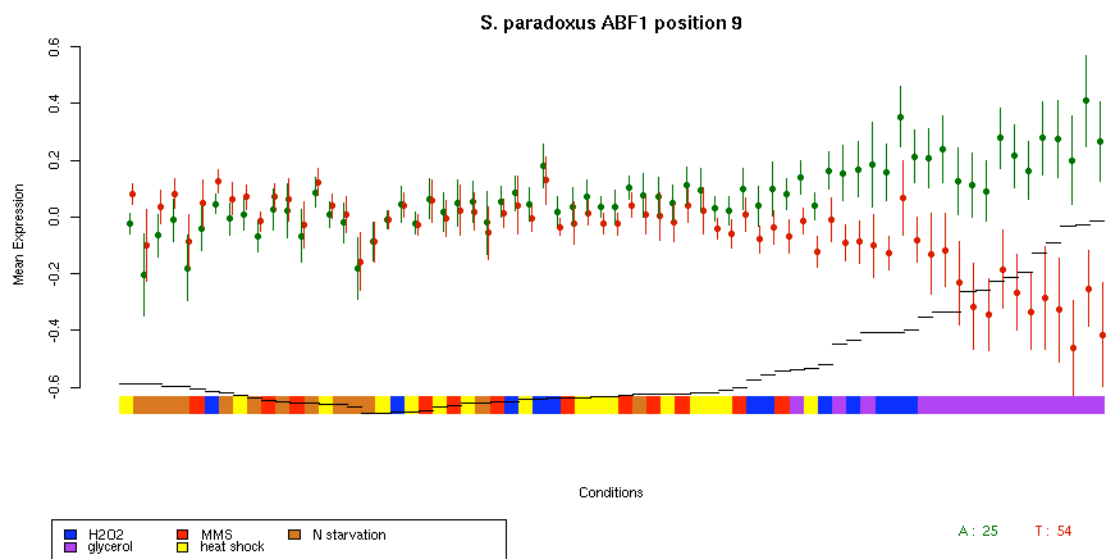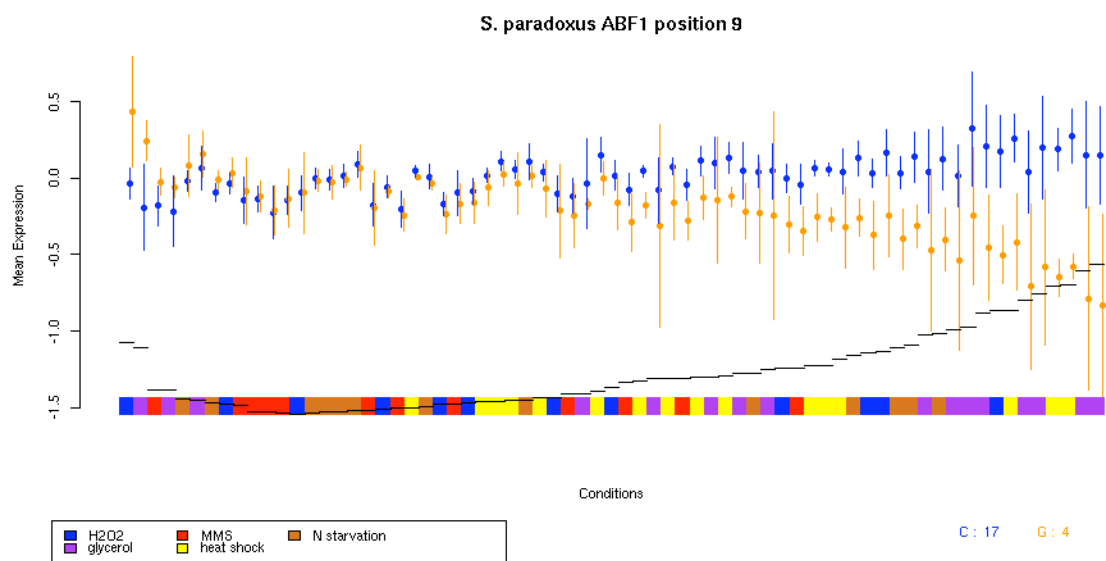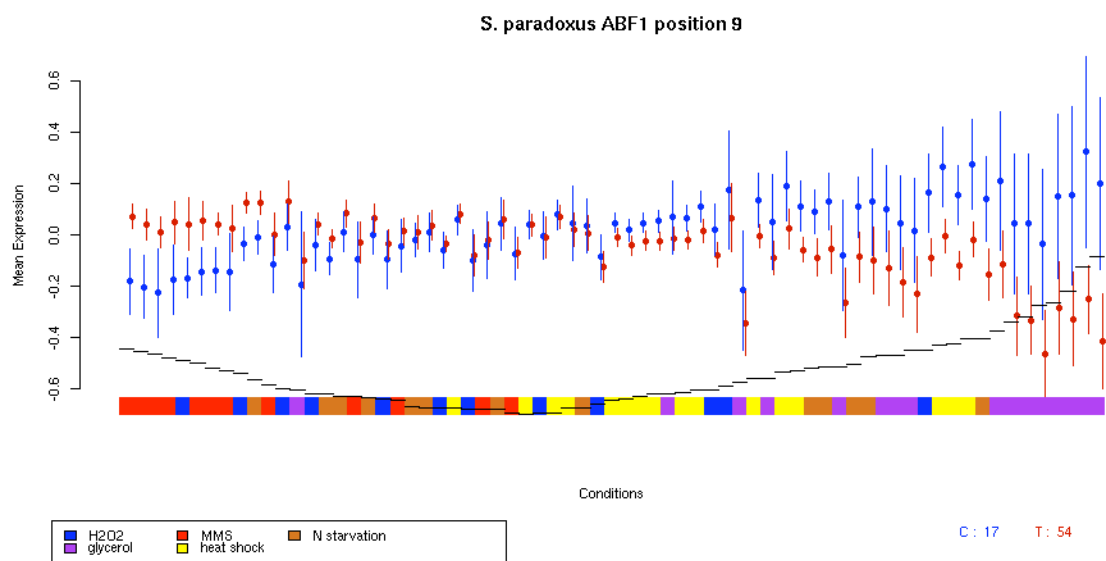

S. paradoxus ABF1 position 9

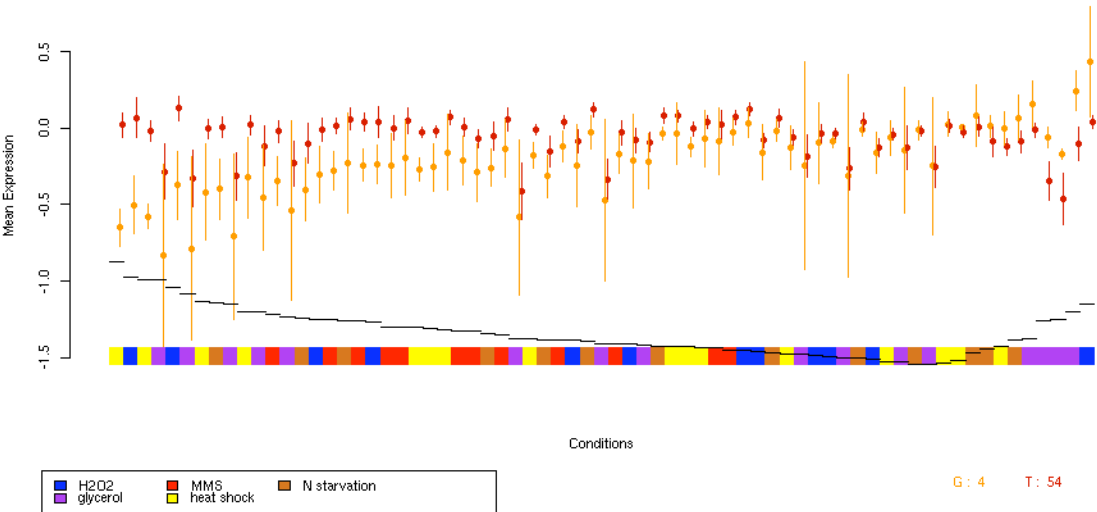

S. paradoxus CIN5 position 9

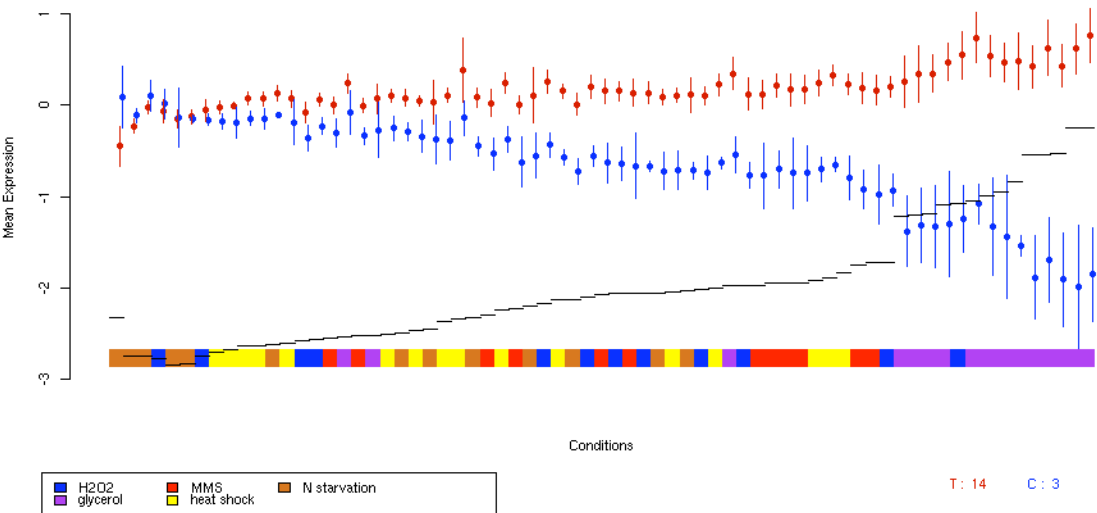

S. paradoxus doublePAC position 11

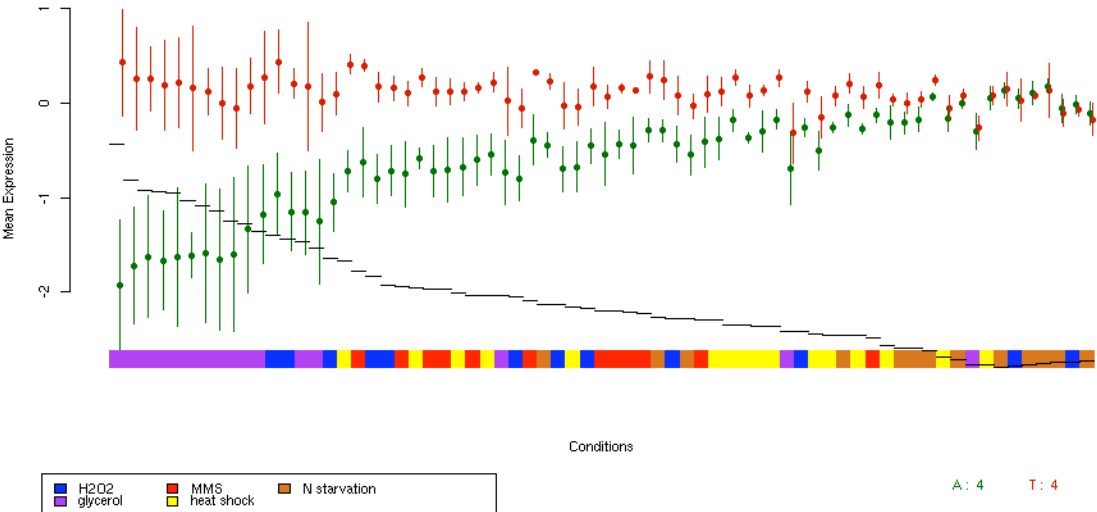

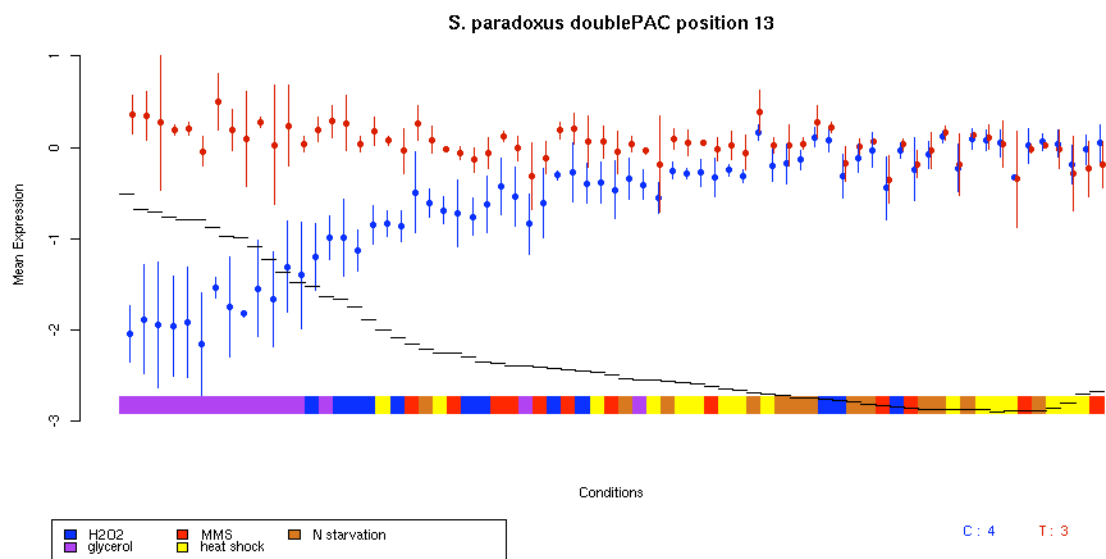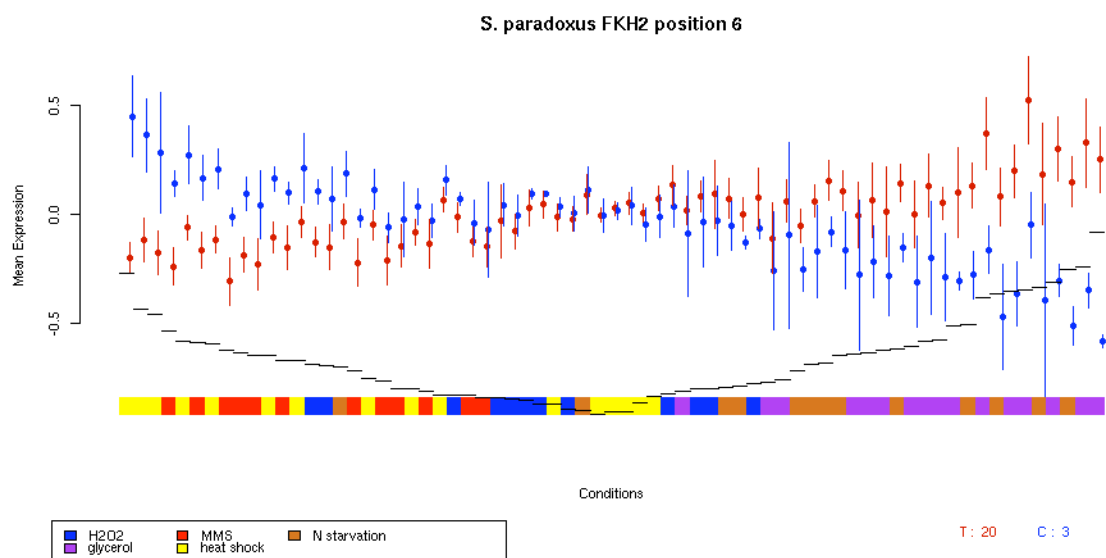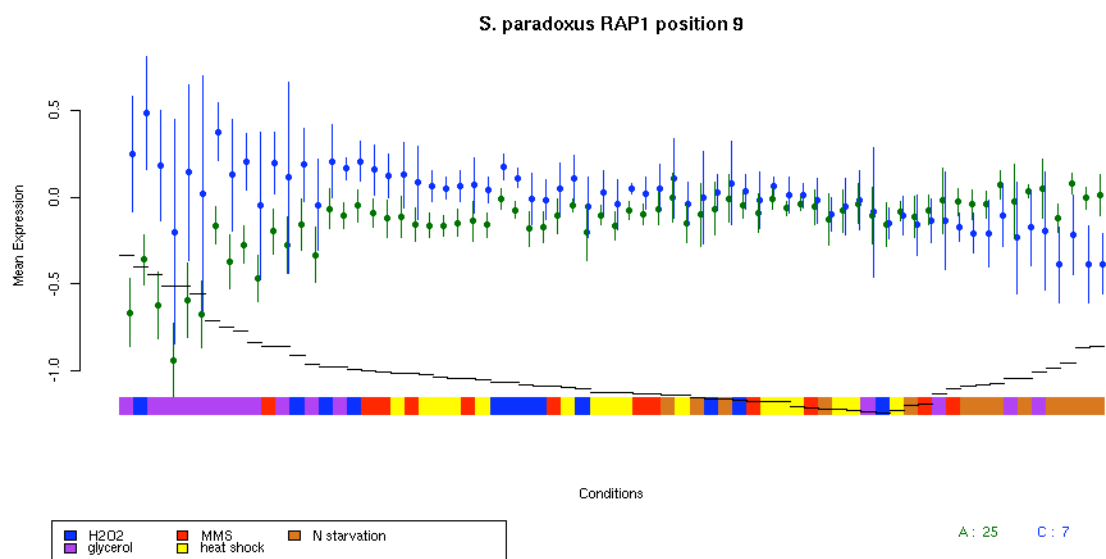

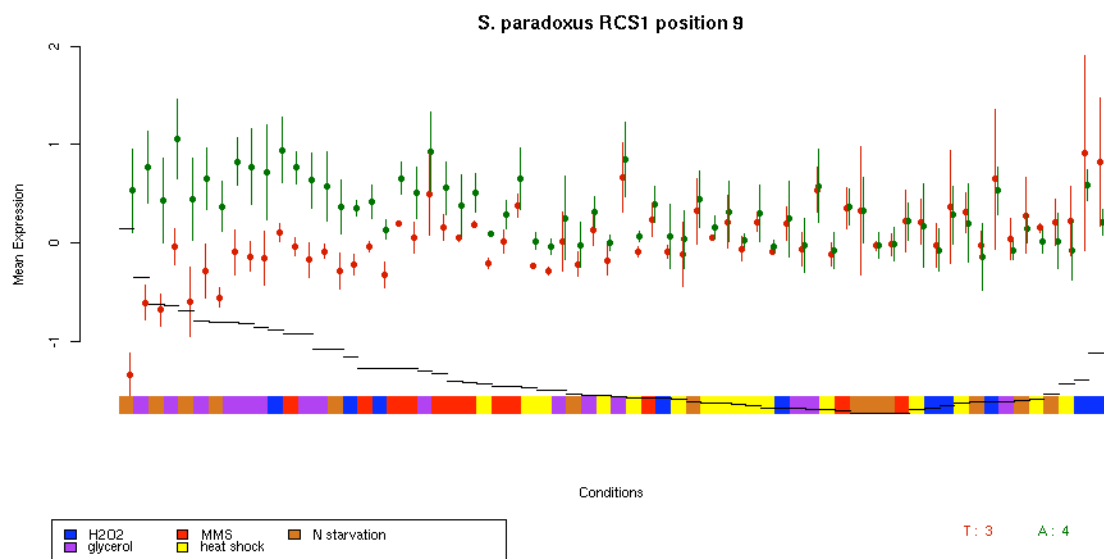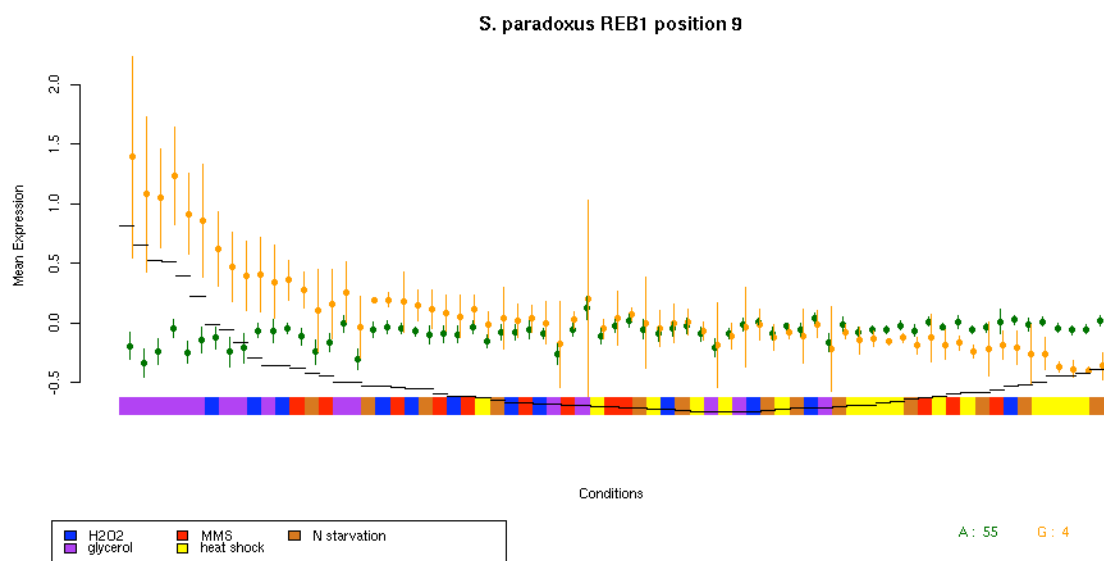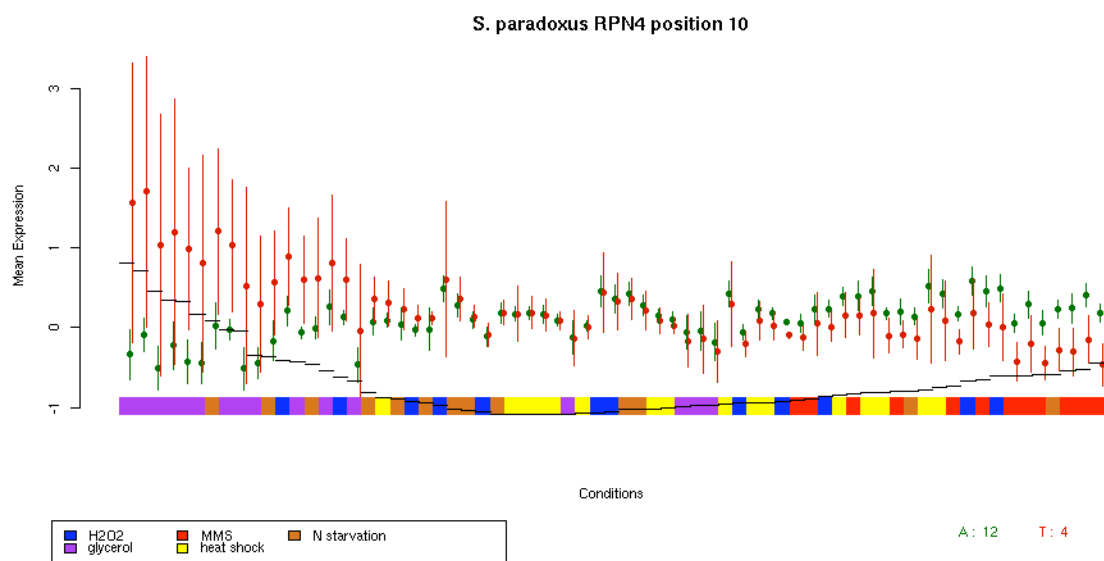



*S. paradoxus* STB5 position 1

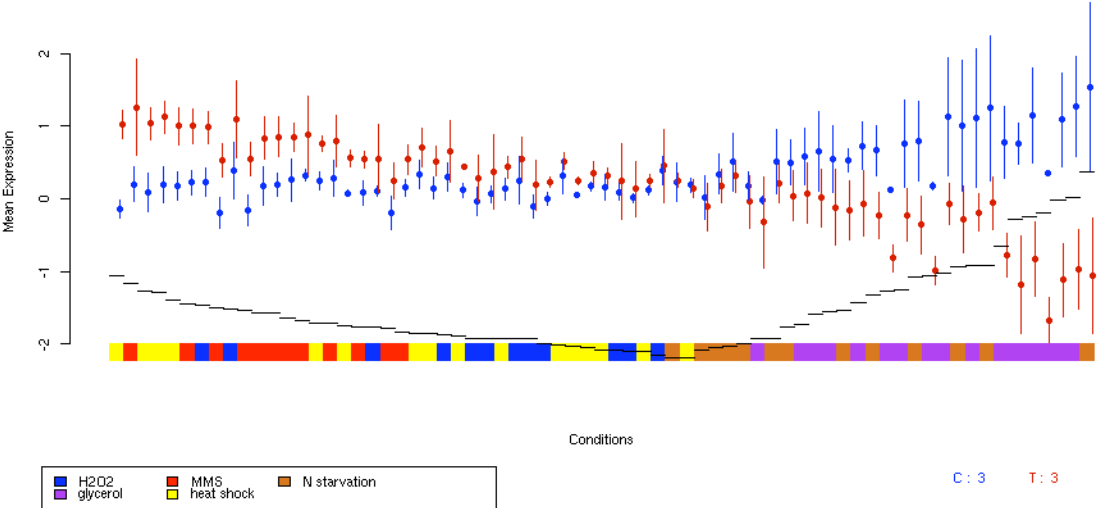

*S. paradoxus* THI2 position 3

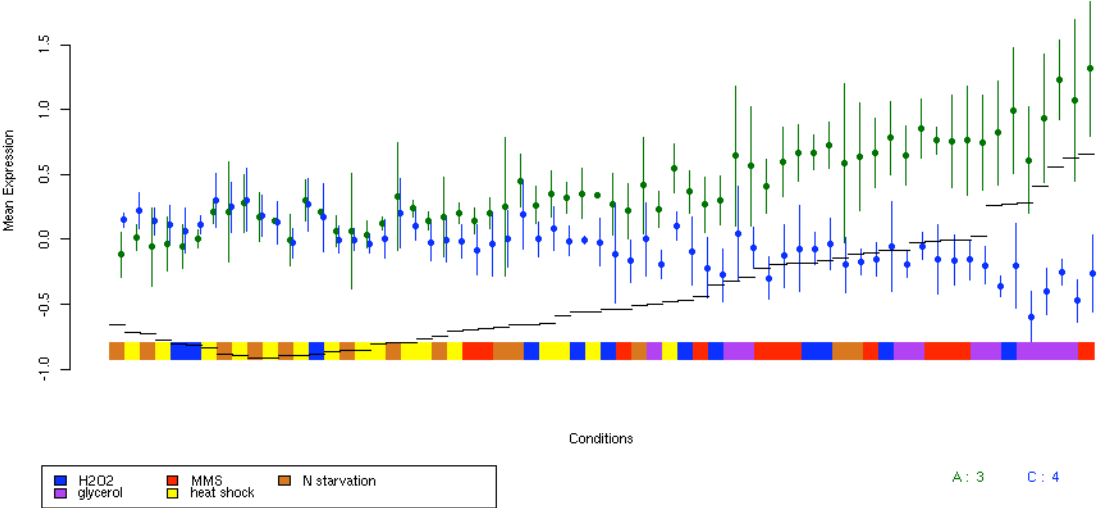

*S. paradoxus* THI2 position 7

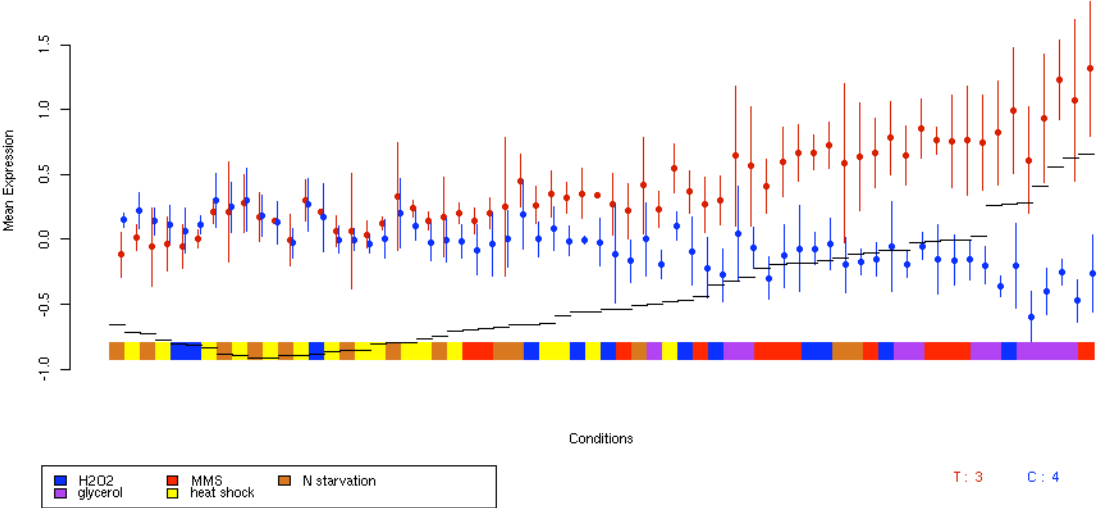

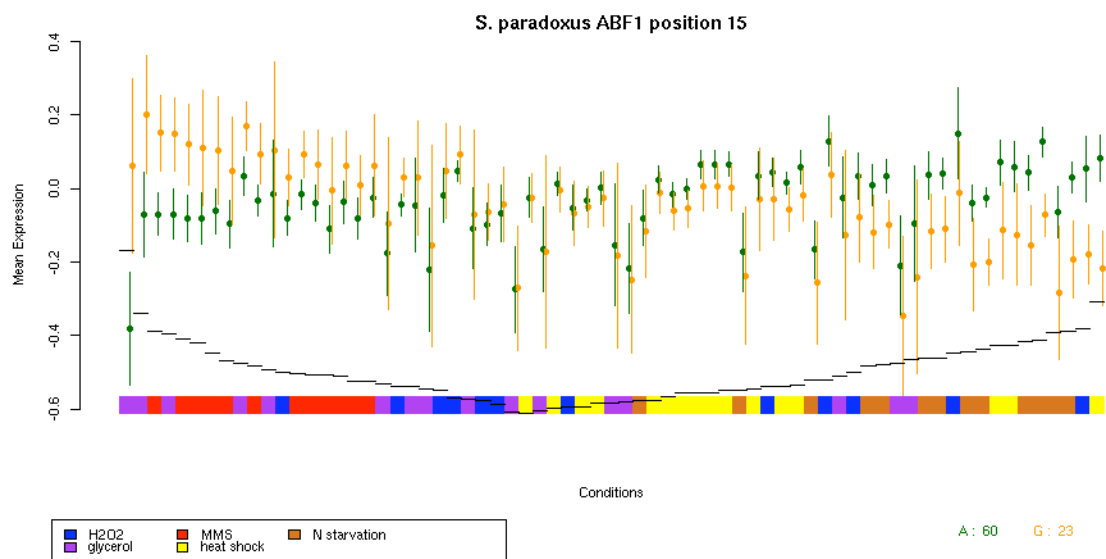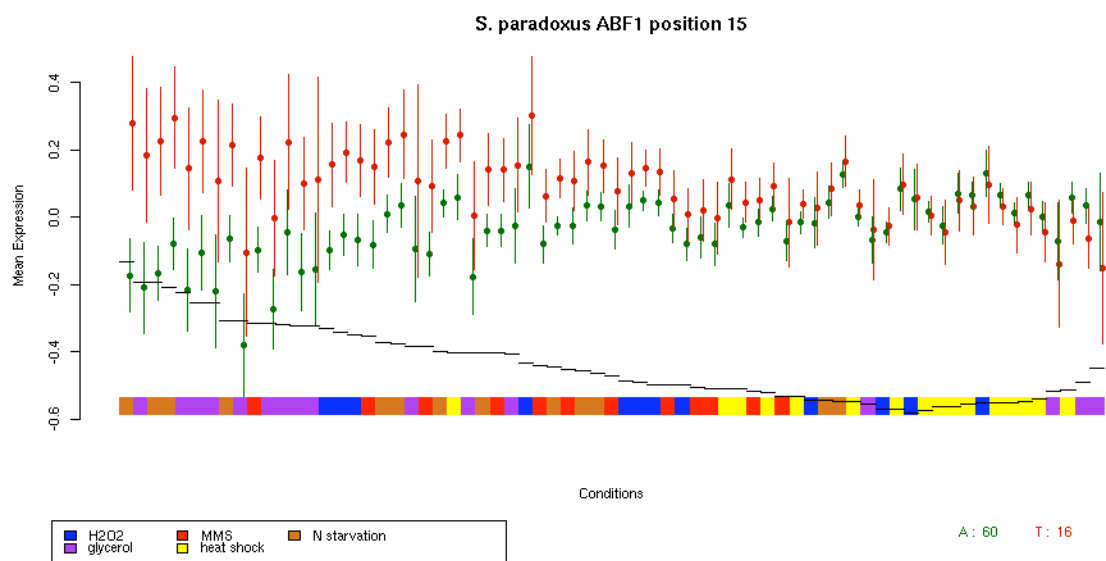

Supplement: S5 (10.1371/journal.pone.0032274.s005) [file journal.pone.0032274.s005]
