# Supplementary material for: Contribution of Transcription Factor Binding Site Motif Variants to Condition-Specific Gene Expression Patterns in Budding Yeast
Source: PLOS journal article supplement (doi:10.1371/journal.pone.0032274), 2012-02-23
Supplement: S2 (10.1371/journal.pone.0032274.s002) [file journal.pone.0032274.s002.pdf › journal.pone.0032274.s002.pdf]

**Figure S2. Mean expression levels of target genes with multiple primary inputs (posterior probability >0.7), for functional variants that were identified in both a dataset with multiple primary inputs, and limited to genes with a single primary input.** Expression data is from 211 Affymetrix S98 arrays and a variety of experimental conditions. Even if more than two variants exist at a position, only two are shown in each individual graph, and additional graphs show the pairwise comparison between each variant present at each position. The means are ordered across conditions according to the difference between mean expression of the two variants. Vertical lines extending from each point indicate the standard deviation of the mean. Horizontal black bars indicate the difference between the mean ranks. The significance of the functional heterogeneity was determined without reference to the segregation of experimental conditions, which are shown according to color along the xaxis. The number of targets for each variant graphed are shown at the bottom right hand of the graph.

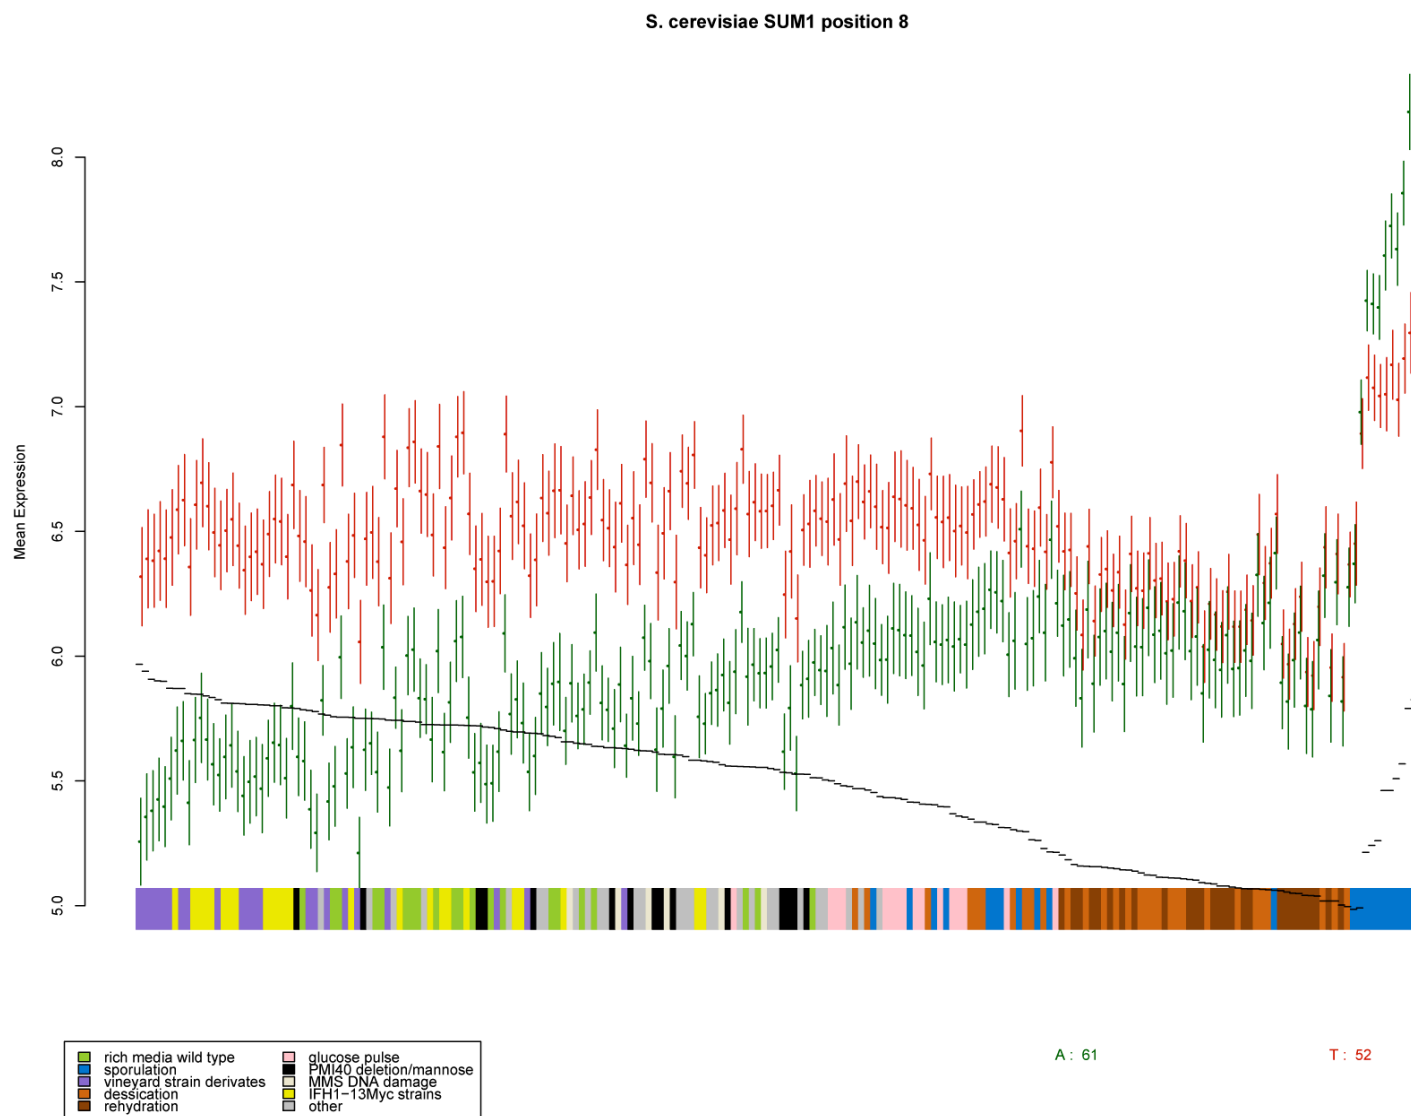

**S. cerevisiae SUM1 position 8**

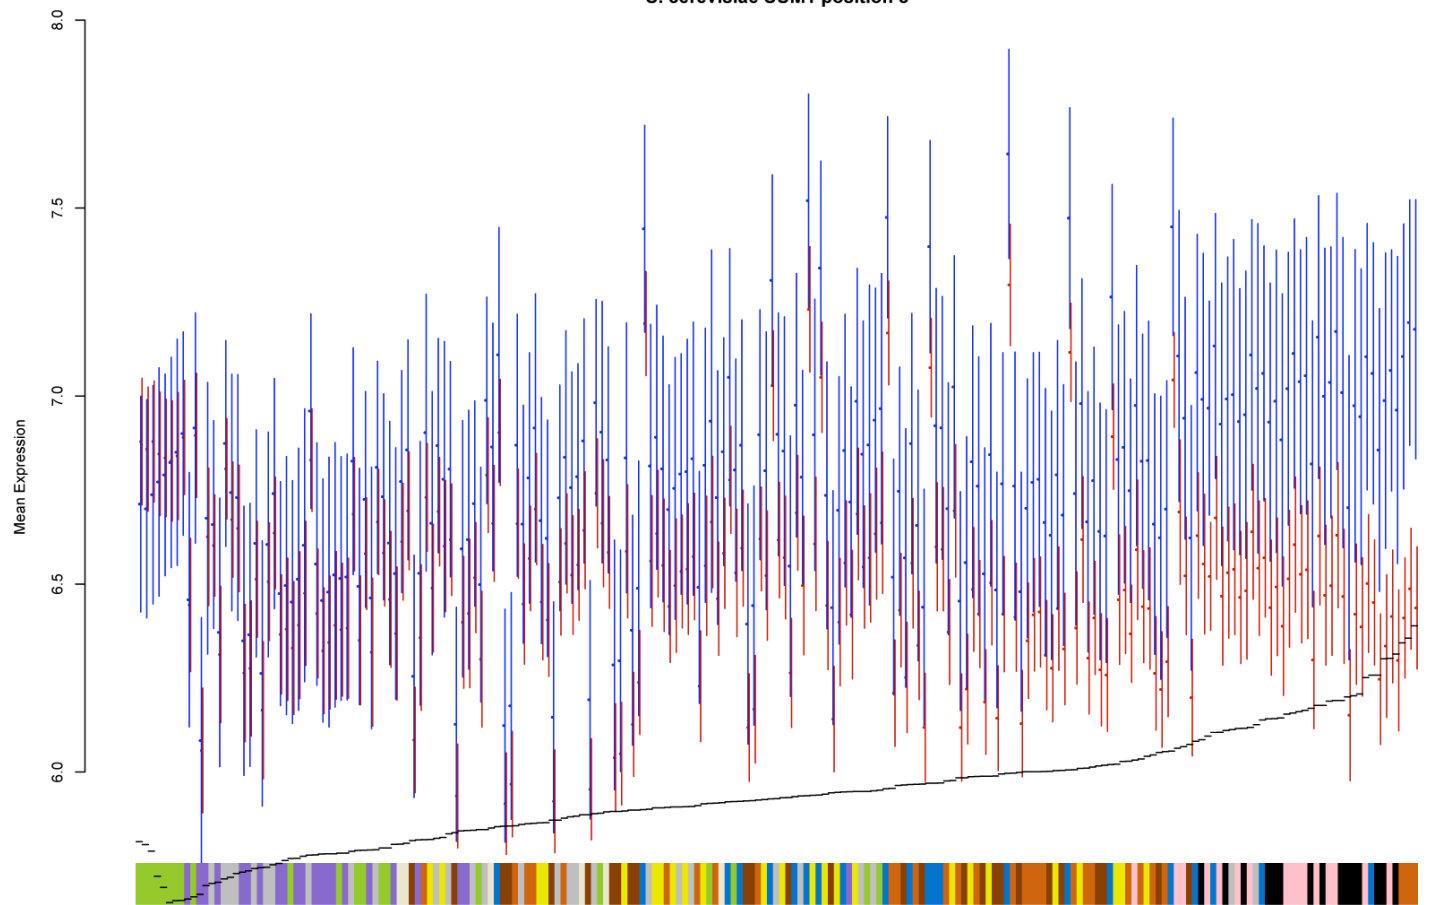

C : 19

T : 52

*S. cerevisiae* SUM1 position 8

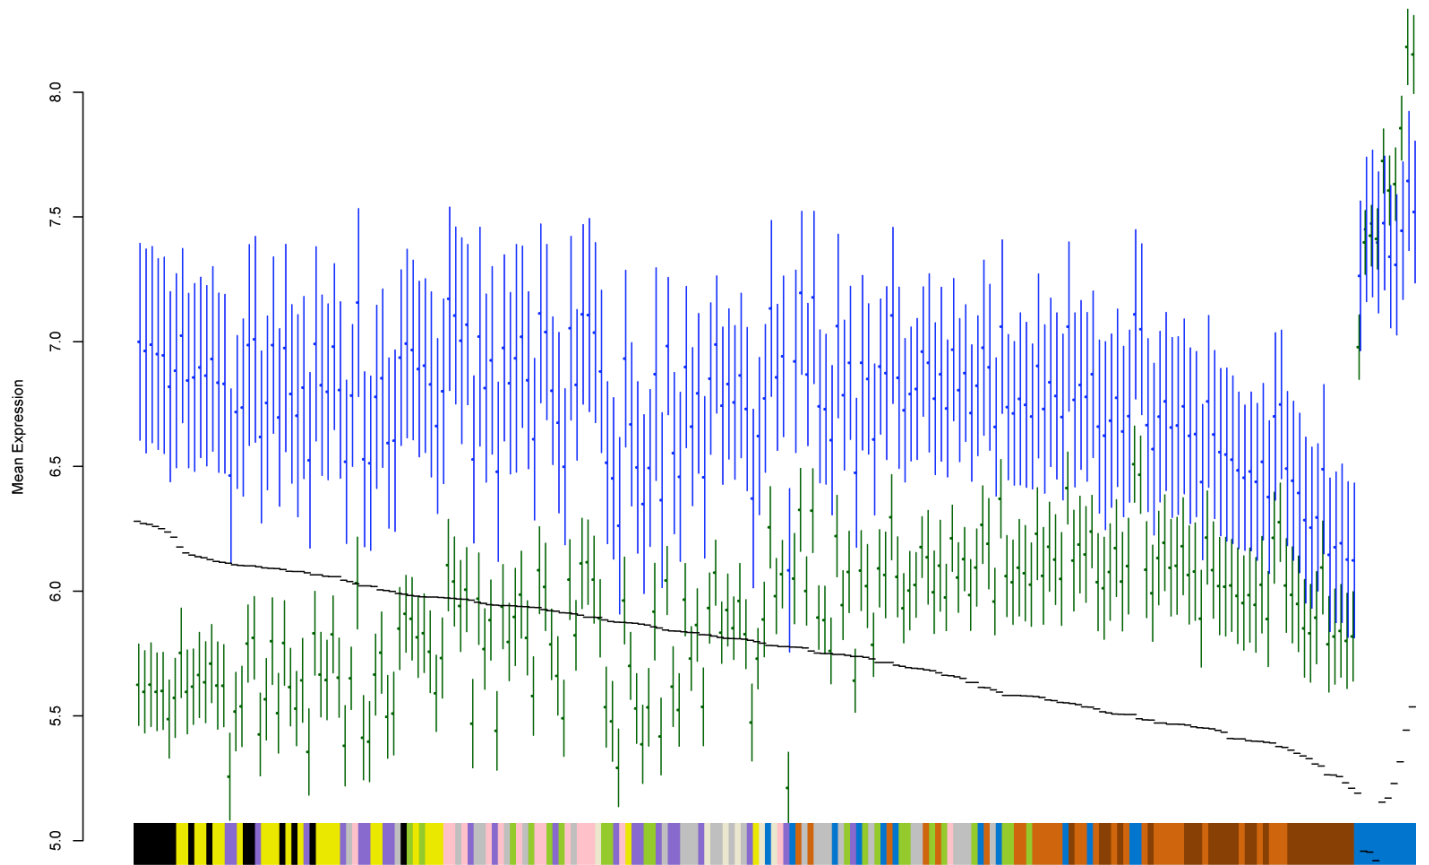

A : 61

C : 19

*S. cerevisiae* SUM1 position 7

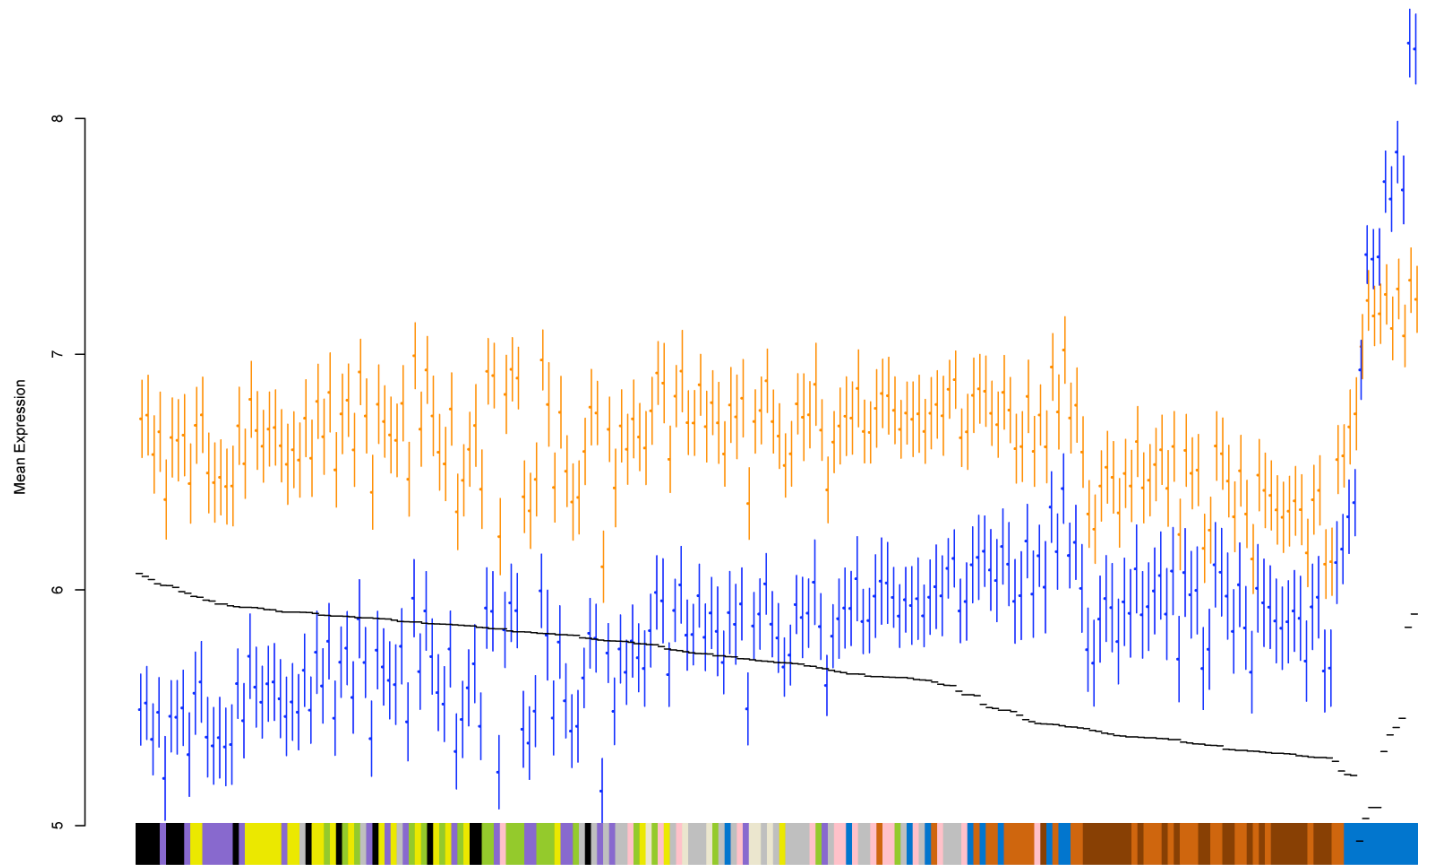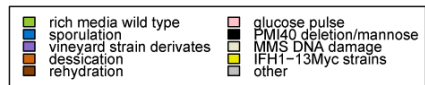

C : 60

G : 70

*S. cerevisiae* SUM1 position 7

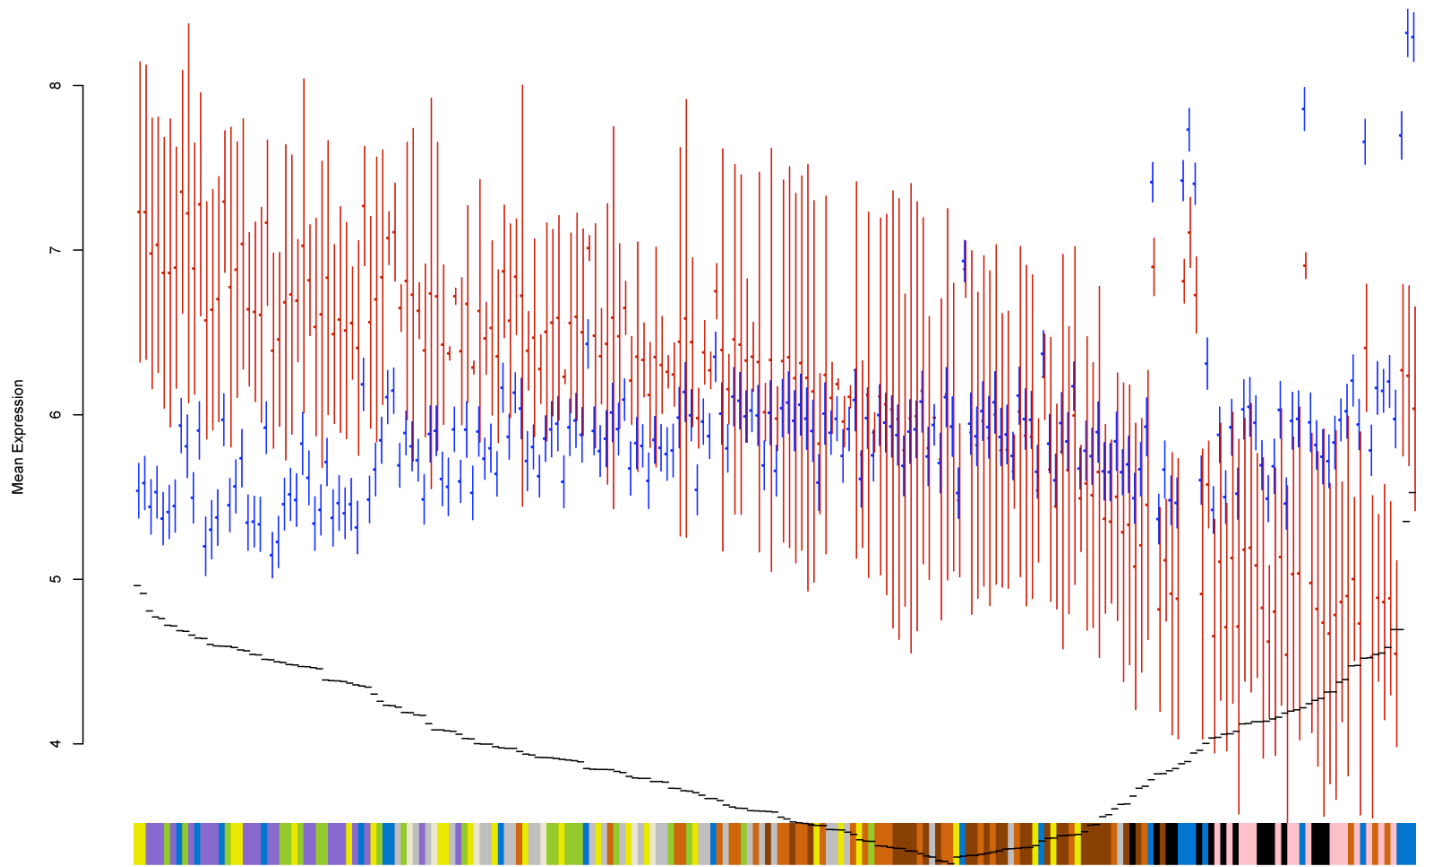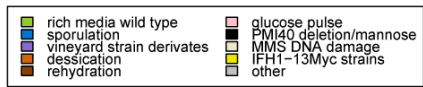

C : 60

T : 2

*S. cerevisiae* SUM1 position 7

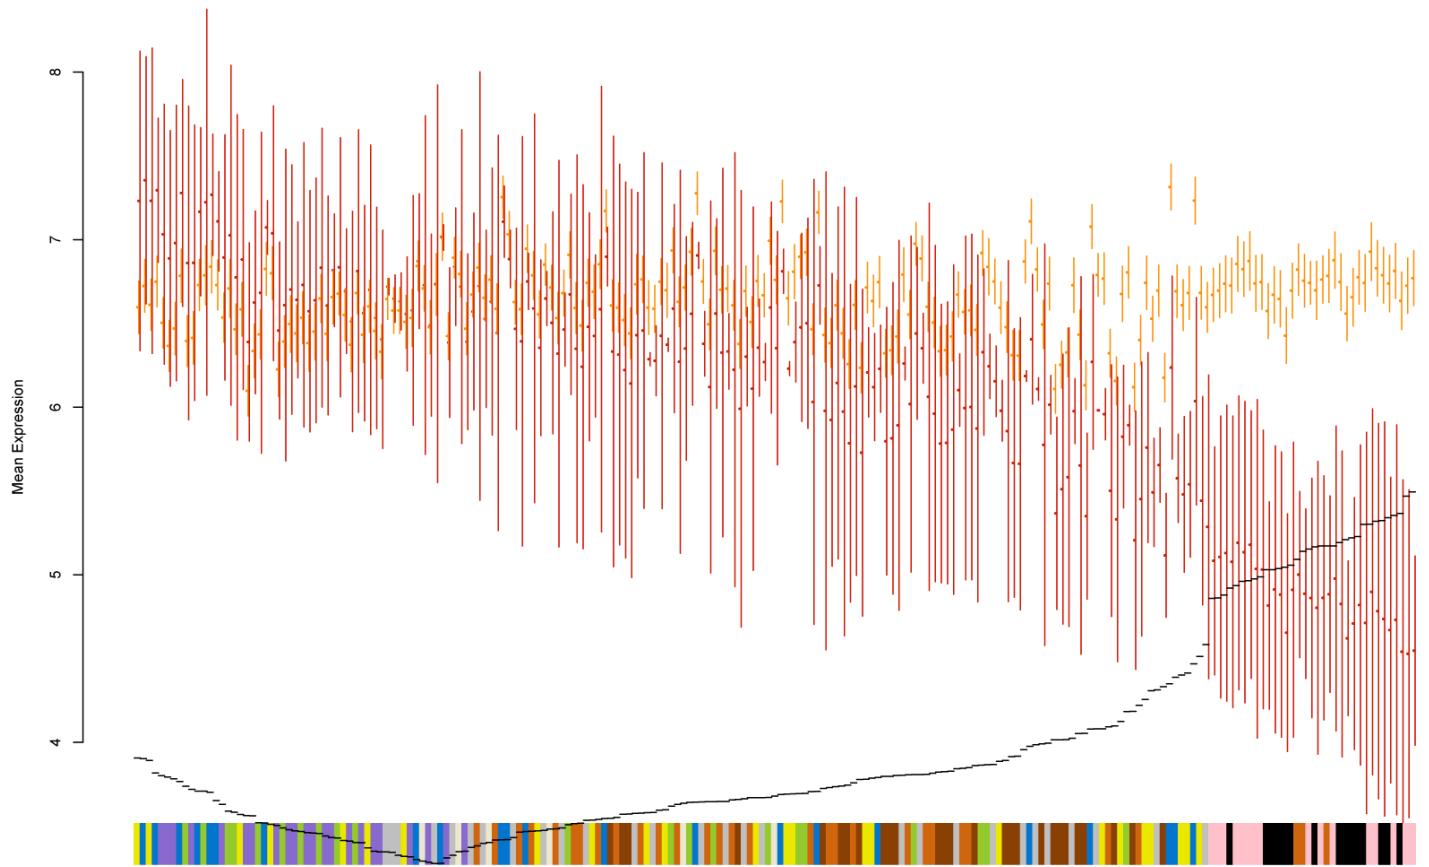

G : 70

T : 2

*S. cerevisiae* ABF1 position 8

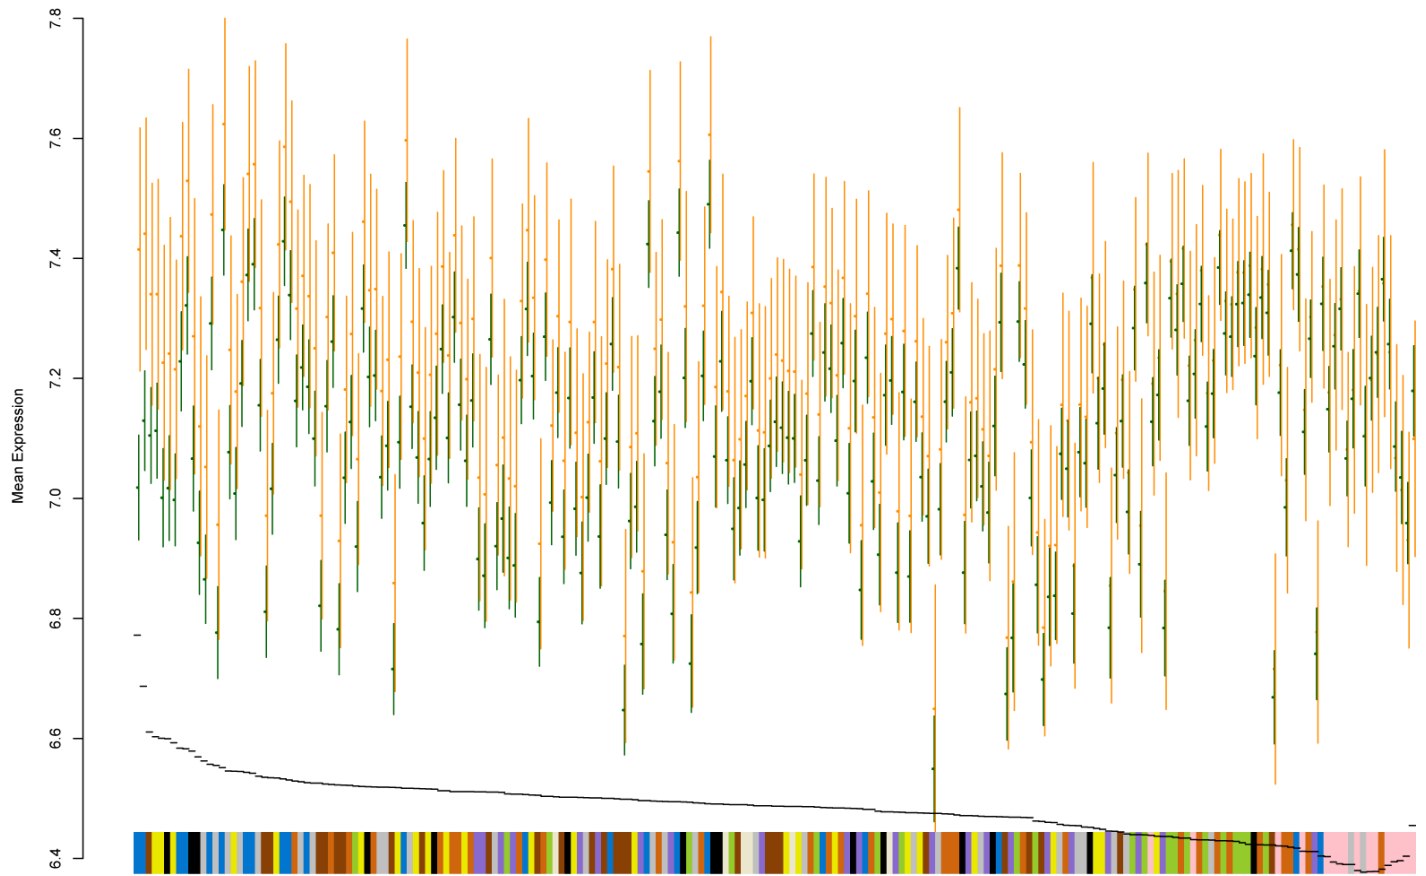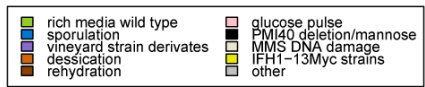

*S. cerevisiae* ABF1 position 8

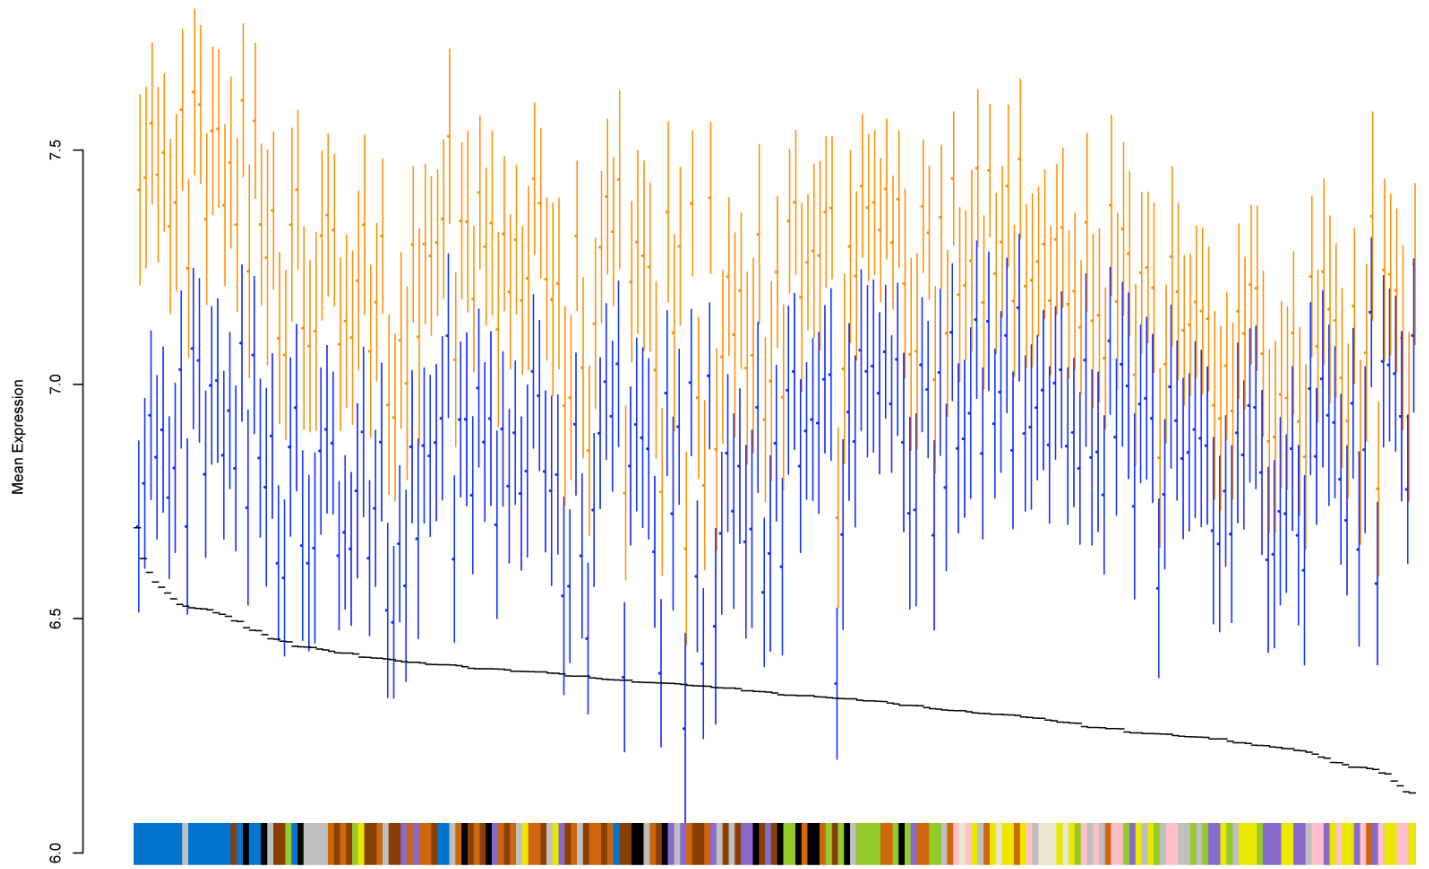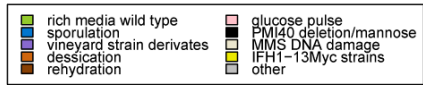

C : 54

G : 44



**S. cerevisiae ABF1 position 8**

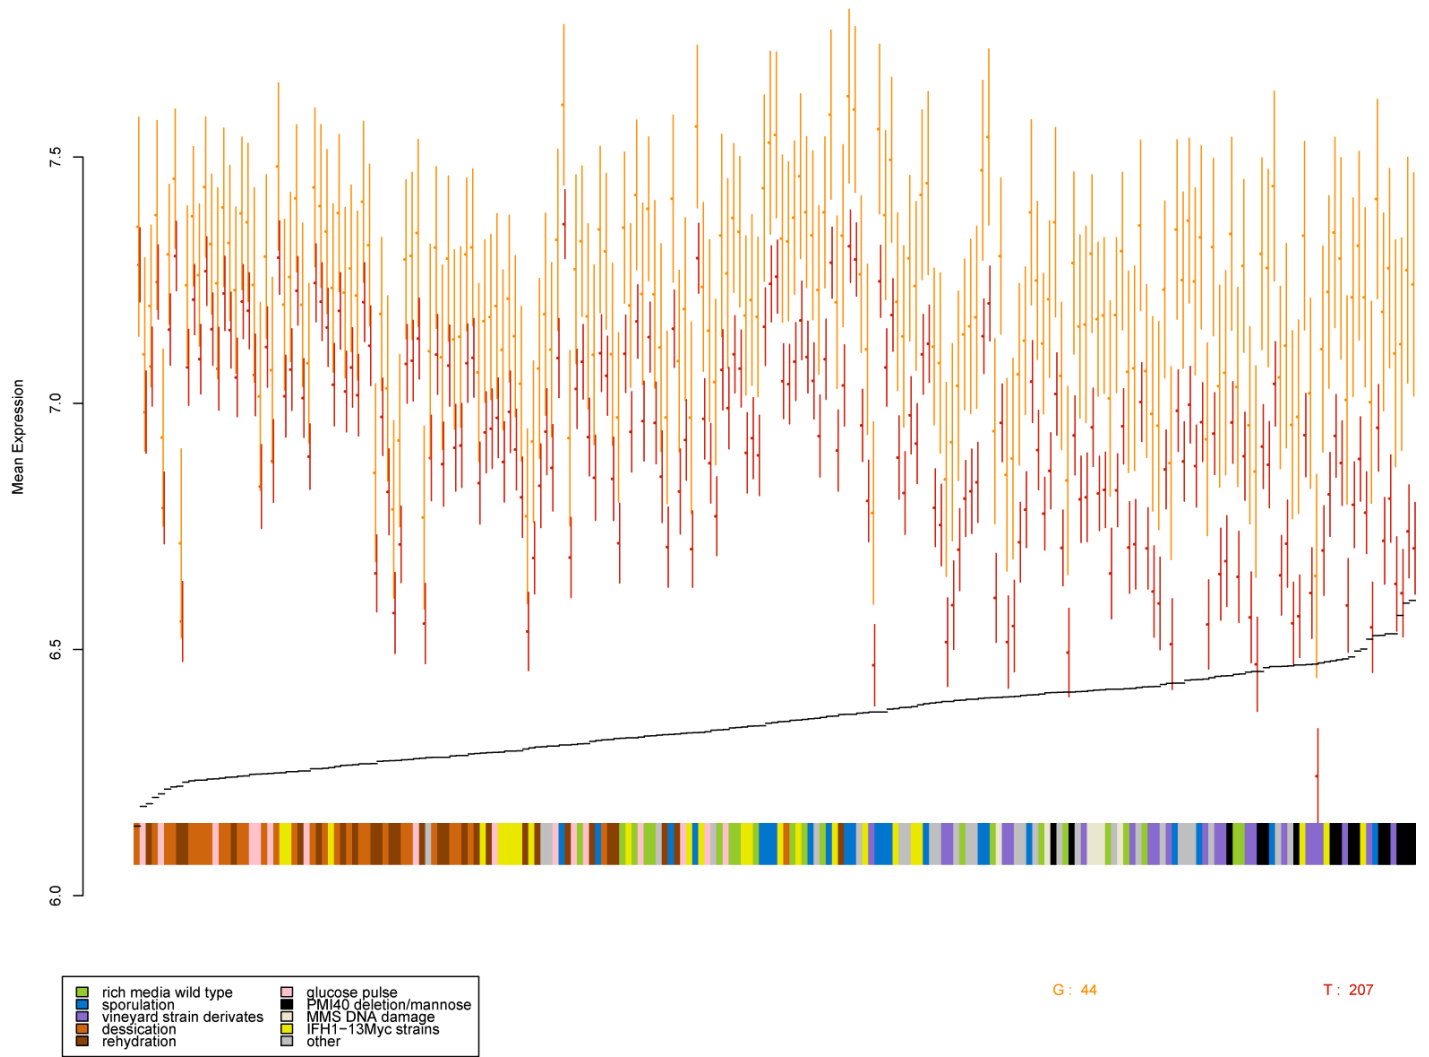

# *S. cerevisiae* ABF1 position 8

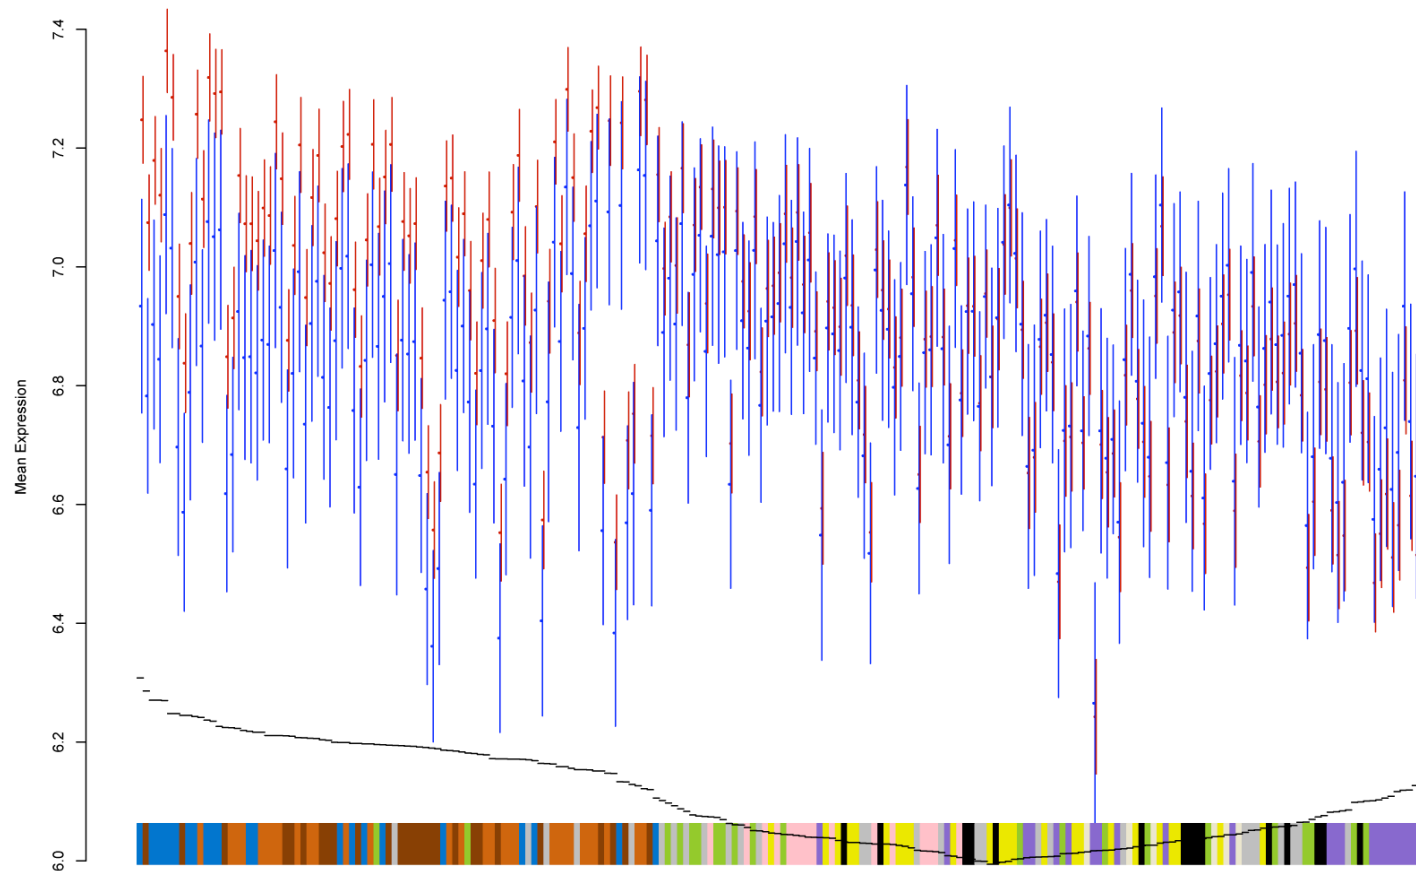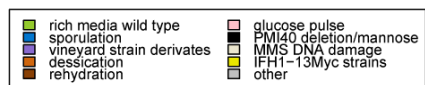

C : 54

T : 207

**S. cerevisiae ABF1 position 8**

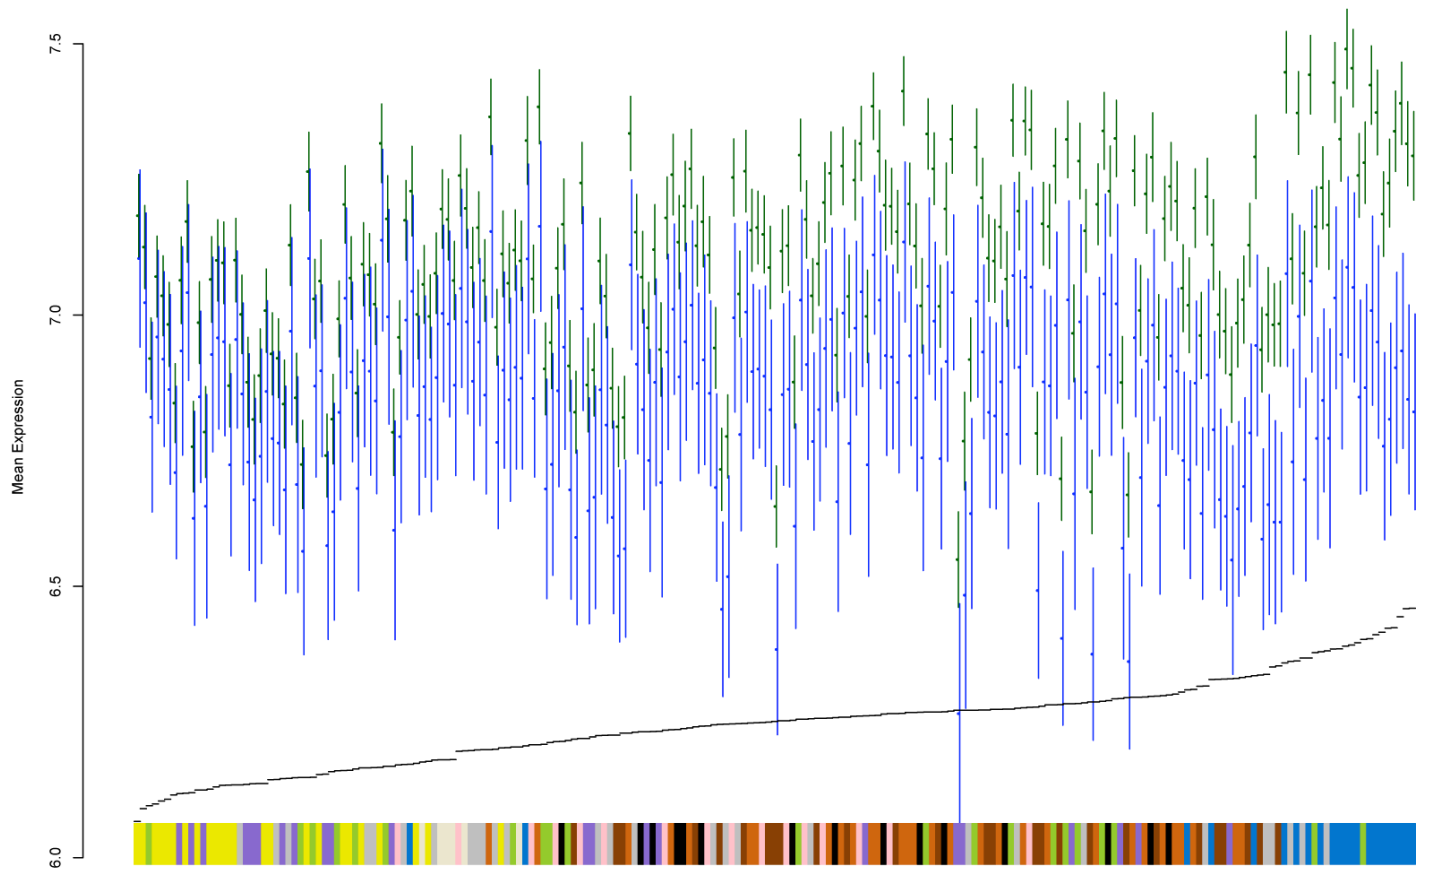

A : 200

C : 54
