# Supplementary material for: Contribution of Transcription Factor Binding Site Motif Variants to Condition-Specific Gene Expression Patterns in Budding Yeast
Source: PLOS journal article supplement (doi:10.1371/journal.pone.0032274), 2012-02-23

**Figure S3. Comparison of expression patterns in *S. cerevisiae* of genes associated with “A” and “T” variants at position 7 of the RAP1 transcription factor binding site based on A) binding site annotations from small-scale experimental mapping or B) the genome-wide annotations used in this study.** Of six RAP1 binding sites for single input genes according to SCPD, three identical (same position and sequence) binding sites are found in the genome-wide binding site annotations used in this study. A) Genes with only a single RAP1 binding site and no other TF binding site annotations collected from the experimental mapping literature in SCPD[62] were selected. Average expression values of 3 genes with an “A” nucleotide at position 7 of their associated RAP1 binding site are lower during growth in glycerol than the average expression values of 2 genes with a “T.” Expression values of genes with either binding variant are not different during growth in other stress conditions. B) Position 7 of the RAP1 binding site is functionally variant ( $p=0.024$ ) based on our analysis of genome-wide binding site annotations for RAP1 derived from genome-scanning with models based on ChIP-chip binding assays, conservation and motif overrepresentation [36,50,51,52]. Similar to above, average expression of 27 genes with an “A” variant at position 7 of their associated RAP1 binding site are expressed at a lower level than 3 genes with a “T”.

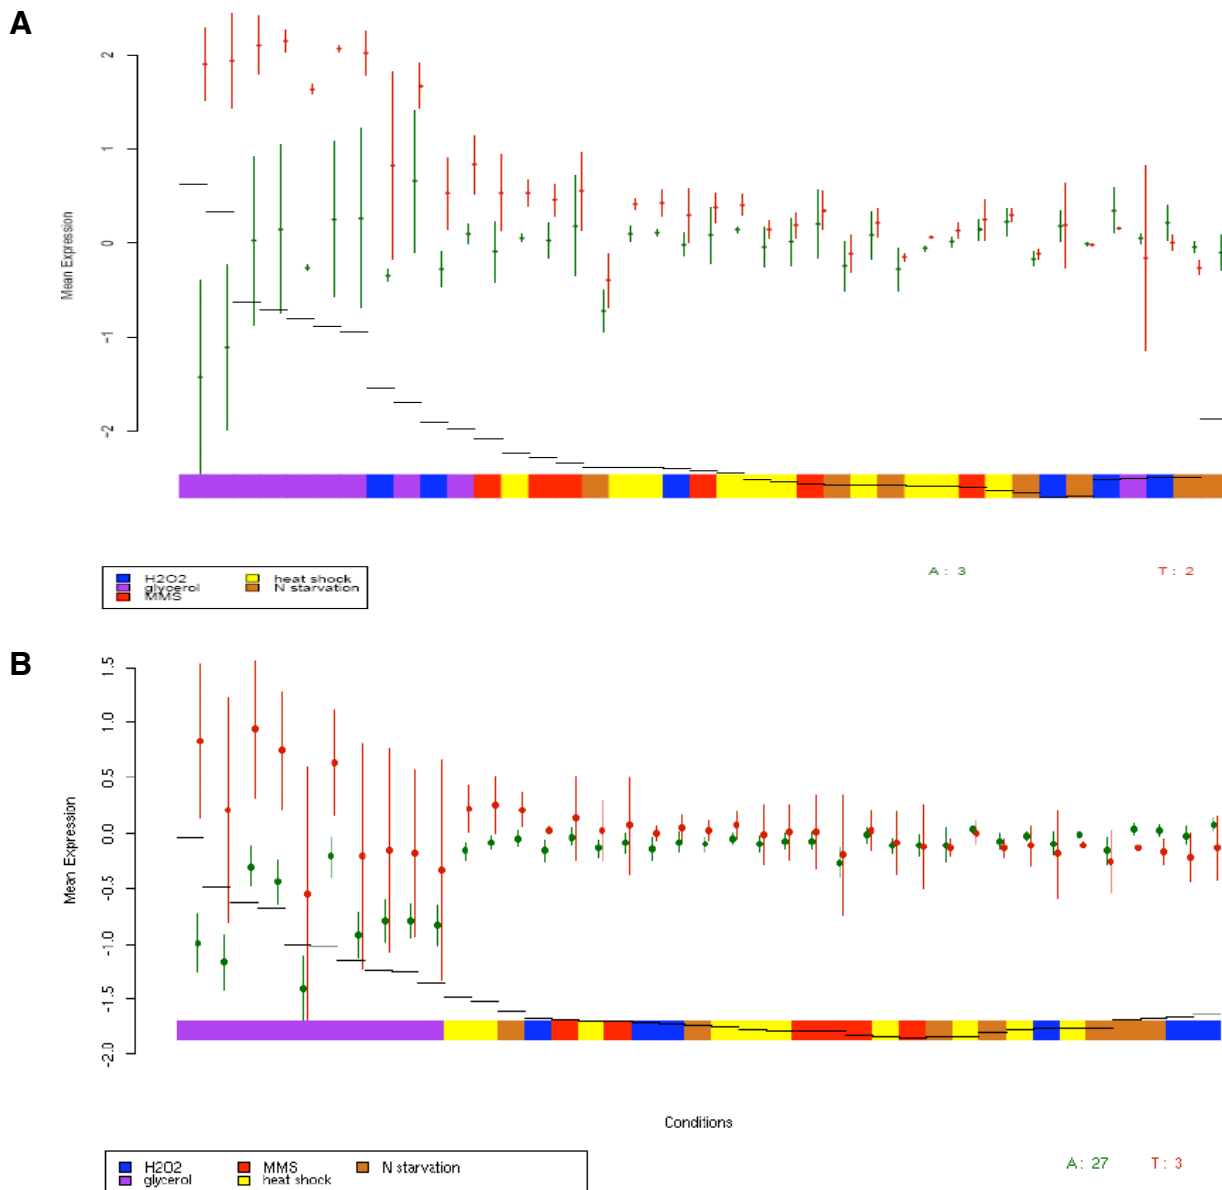

Supplement: S3 (10.1371/journal.pone.0032274.s003) [file journal.pone.0032274.s003.pdf › journal.pone.0032274.s003.pdf]
