# Supplementary material for: Contribution of Transcription Factor Binding Site Motif Variants to Condition-Specific Gene Expression Patterns in Budding Yeast
Source: PLOS journal article supplement (doi:10.1371/journal.pone.0032274), 2012-02-23

**Figure S4. Number of target genes associated with functional and non-functional motif positions.** Variable motif positions considered in the analysis have, on average, ~35 target genes, and functional variants do not have a significantly different number of target genes than do non-functional variants ( $p=0.4$ ).

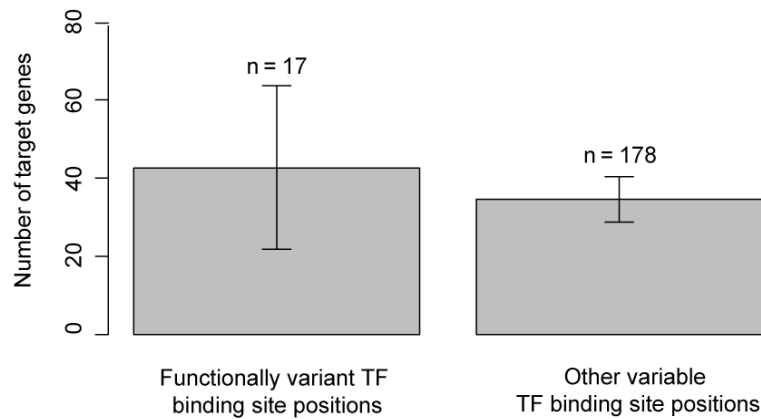

Supplement: S4 (10.1371/journal.pone.0032274.s004) [file journal.pone.0032274.s004]
