# Supplementary material for: Contribution of Transcription Factor Binding Site Motif Variants to Condition-Specific Gene Expression Patterns in Budding Yeast
Source: PLOS journal article supplement (doi:10.1371/journal.pone.0032274), 2012-02-23
Supplement: S6 (10.1371/journal.pone.0032274.s006) [file journal.pone.0032274.s006.pdf › journal.pone.0032274.s006.pdf]

**Table S1. Transcription factor binding motif positions identified with functionally variant (p<0.05) positions.**

| Transcription Factor Binding Site Family | Position | Score (F) | p-value | Information Content (bits) | Species              | Platform       |
|------------------------------------------|----------|-----------|---------|----------------------------|----------------------|----------------|
| MCM1                                     | 4        | 122.526   | 0.032   | 0.15                       | <i>S. cerevisiae</i> | Affymetrix S98 |
| STE12DIG1                                | 7        | 143.644   | 0.002   | 0.53                       | <i>S. cerevisiae</i> | Affymetrix S98 |
| REB1                                     | 2        | 27.4023   | 0.005   | 0.03                       | <i>S. cerevisiae</i> | Affymetrix S98 |
| YOX1                                     | 5        | 366.652   | 0.034   | 0.50                       | <i>S. cerevisiae</i> | Affymetrix S98 |
| SUM1                                     | 7        | 92.4822   | 0.002   | 0.99                       | <i>S. cerevisiae</i> | Affymetrix S98 |
| RGT1                                     | 2        | 158.442   | 0.011   | 1.60                       | <i>S. cerevisiae</i> | Affymetrix S98 |
| SUM1                                     | 8        | 89.3686   | 0.003   | 0.68                       | <i>S. cerevisiae</i> | Affymetrix S98 |
| RPN4                                     | 10       | 93.9509   | 0.018   | 0.30                       | <i>S. cerevisiae</i> | Affymetrix S98 |
| PAC                                      | 5        | 76.2545   | 0.022   | 0.96                       | <i>S. cerevisiae</i> | Affymetrix S98 |
| THI2                                     | 8        | 265.722   | 0.012   | 0.11                       | <i>S. cerevisiae</i> | Affymetrix S98 |
| THI2                                     | 10       | 330.062   | 0       | 0.96                       | <i>S. cerevisiae</i> | Affymetrix S98 |
| FKH2                                     | 1        | 44.191    | 0.031   | 0.96                       | <i>S. cerevisiae</i> | Affymetrix S98 |
| ROX1                                     | 9        | 142.987   | 0.008   | 1.46                       | <i>S. cerevisiae</i> | Affymetrix S98 |
| TEC1                                     | 4        | 233.906   | 0.044   | 0.98                       | <i>S. cerevisiae</i> | Affymetrix S98 |
| FKH2                                     | 6        | 79.4414   | 0.006   | 1.55                       | <i>S. cerevisiae</i> | Affymetrix S98 |
| ABF1                                     | 8        | 16.7334   | 0.034   | 0.23                       | <i>S. cerevisiae</i> | Affymetrix S98 |
| DOUBLEPAC                                | 1        | 81.1273   | 0.031   | 1.11                       | <i>S. cerevisiae</i> | Affymetrix S98 |
| SPT15                                    | 2        | 2.57282   | 0.01    | 1.03                       | <i>S. cerevisiae</i> | Y6.4kv6 cDNA   |
| RAP1                                     | 7        | 9.00021   | 0.024   | 0.96                       | <i>S. cerevisiae</i> | Y6.4kv6 cDNA   |
| NRG1                                     | 2        | 41.9398   | 0       | 1.04                       | <i>S. cerevisiae</i> | Y6.4kv6 cDNA   |
| GCN4                                     | 1        | 10.6391   | 0.039   | 1.11                       | <i>S. cerevisiae</i> | Y6.4kv6 cDNA   |
| RAP1                                     | 10       | 8.11308   | 0.005   | 0.98                       | <i>S. cerevisiae</i> | Y6.4kv6 cDNA   |
| THI2                                     | 3        | 7.81477   | 0.045   | 0.96                       | <i>S. cerevisiae</i> | Y6.4kv6 cDNA   |
| STB5                                     | 1        | 28.6462   | 0.017   | 0.40                       | <i>S. cerevisiae</i> | Y6.4kv6 cDNA   |
| MATALPHA2                                | 9        | 7.88728   | 0.027   | 1.31                       | <i>S. cerevisiae</i> | Y6.4kv6 cDNA   |
| RPN4                                     | 10       | 9.66342   | 0.026   | 0.39                       | <i>S. cerevisiae</i> | Y6.4kv6 cDNA   |
| HSF1                                     | 7        | 16.4034   | 0       | 0.98                       | <i>S. cerevisiae</i> | Y6.4kv6 cDNA   |
| PAC                                      | 5        | 11.3592   | 0.039   | 1.07                       | <i>S. cerevisiae</i> | Y6.4kv6 cDNA   |
| THI2                                     | 9        | 18.2617   | 0.02    | 0.66                       | <i>S. cerevisiae</i> | Y6.4kv6 cDNA   |
| REB1                                     | 9        | 3.12416   | 0.035   | 1.42                       | <i>S. cerevisiae</i> | Y6.4kv6 cDNA   |
| ABF1                                     | 15       | 2.89839   | 0.011   | 0.54                       | <i>S. paradoxus</i>  | Y6.4kv6 cDNA   |
| RAP1                                     | 9        | 15.9336   | 0.002   | 1.02                       | <i>S. paradoxus</i>  | Y6.4kv6 cDNA   |
| DOUBLEPAC                                | 11       | 38.2778   | 0.023   | 0.96                       | <i>S. paradoxus</i>  | Y6.4kv6 cDNA   |
| DOUBLEPAC                                | 13       | 81.0947   | 0.018   | 0.55                       | <i>S. paradoxus</i>  | Y6.4kv6 cDNA   |
| THI2                                     | 3        | 20.9998   | 0.027   | 0.97                       | <i>S. paradoxus</i>  | Y6.4kv6 cDNA   |
| STB5                                     | 1        | 85.3544   | 0       | 0.51                       | <i>S. paradoxus</i>  | Y6.4kv6 cDNA   |
| CIN5                                     | 9        | 39.8133   | 0       | 1.28                       | <i>S. paradoxus</i>  | Y6.4kv6 cDNA   |
| RPN4                                     | 10       | 17.2365   | 0.041   | 0.62                       | <i>S. paradoxus</i>  | Y6.4kv6 cDNA   |
| RCS1                                     | 9        | 20.3875   | 0       | 0.97                       | <i>S. paradoxus</i>  | Y6.4kv6 cDNA   |
| FKH2                                     | 6        | 15.6846   | 0.005   | 1.40                       | <i>S. paradoxus</i>  | Y6.4kv6 cDNA   |
| THI2                                     | 7        | 20.9998   | 0.023   | 0.97                       | <i>S. paradoxus</i>  | Y6.4kv6 cDNA   |
| REB1                                     | 9        | 7.2033    | 0.039   | 1.60                       | <i>S. paradoxus</i>  | Y6.4kv6 cDNA   |
| ABF1                                     | 9        | 4.01149   | 0.002   | 0.36                       | <i>S. paradoxus</i>  | Y6.4kv6 cDNA   |
| MCM1                                     | 6        | 17.6815   | 0       | 0.96                       | <i>S. mikatae</i>    | Y6.4kv6 cDNA   |
| RCS1                                     | 8        | 12.4192   | 0.035   | 0.037                      | <i>S. mikatae</i>    | Y6.4kv6 cDNA   |
| DOUBLEPAC                                | 11       | 56.4898   | 0       | 1.09                       | <i>S. mikatae</i>    | Y6.4kv6 cDNA   |
| YOX1                                     | 13       | 4.89925   | 0       | 0.96                       | <i>S. mikatae</i>    | Y6.4kv6 cDNA   |
| PAC                                      | 6        | 20.4907   | 0.037   | 1.54                       | <i>S. mikatae</i>    | Y6.4kv6 cDNA   |
| SWI4                                     | 2        | 11.2765   | 0.028   | 0.09                       | <i>S. mikatae</i>    | Y6.4kv6 cDNA   |
| REB1                                     | 9        | 2.42043   | 0.037   | 1.52                       | <i>S. mikatae</i>    | Y6.4kv6 cDNA   |
| SPT15                                    | 2        | 2.89672   | 0.028   | 1.17                       | <i>S. mikatae</i>    | Y6.4kv6 cDNA   |
| SWI4                                     | 6        | 12.8533   | 0.019   | 0.96                       | <i>S. mikatae</i>    | Y6.4kv6 cDNA   |

| Transcription Factor<br>Binding Site Family | Position | Score<br>(F) | p-value | Information<br>Content (bits) | Species                | Platform     |
|---------------------------------------------|----------|--------------|---------|-------------------------------|------------------------|--------------|
| ABF1                                        | 6        | 1.28983      | 0.034   | 0.97                          | <i>S. mikatae</i>      | Y6.4kv6 cDNA |
| MBP1                                        | 1        | 4.9658       | 0.035   | 1.06                          | <i>S. mikatae</i>      | Y6.4kv6 cDNA |
| RAP1                                        | 10       | 4.89422      | 0.007   | 1.02                          | <i>S. mikatae</i>      | Y6.4kv6 cDNA |
| DOUBLEPAC                                   | 3        | 36.5188      | 0       | 1.14                          | <i>S. kudriavzevii</i> | Y6.4kv6 cDNA |
| PAC                                         | 12       | 4.90279      | 0.031   | 0.29                          | <i>S. kudriavzevii</i> | Y6.4kv6 cDNA |
| RAP1                                        | 10       | 5.51761      | 0.031   | 0.86                          | <i>S. kudriavzevii</i> | Y6.4kv6 cDNA |
| DOUBLEPAC                                   | 7        | 36.5188      | 0       | 1.14                          | <i>S. kudriavzevii</i> | Y6.4kv6 cDNA |
| HSF1                                        | 6        | 58.0168      | 0.015   | 0.04                          | <i>S. kudriavzevii</i> | Y6.4kv6 cDNA |
| STB5                                        | 6        | 10.9097      | 0       | 0.96                          | <i>S. kudriavzevii</i> | Y6.4kv6 cDNA |
| SPT15                                       | 1        | 10.3586      | 0       | 0.20                          | <i>S. kudriavzevii</i> | Y6.4kv6 cDNA |
| FKH2                                        | 9        | 8.12117      | 0.012   | 1.61                          | <i>S. kudriavzevii</i> | Y6.4kv6 cDNA |
| DOUBLEPAC                                   | 11       | 16.7642      | 0.047   | 1.00                          | <i>S. kudriavzevii</i> | Y6.4kv6 cDNA |
| MAC1                                        | 8        | 22.245       | 0       | 0.96                          | <i>S. kudriavzevii</i> | Y6.4kv6 cDNA |
| FKH2                                        | 11       | 6.79457      | 0.033   | 1.61                          | <i>S. kudriavzevii</i> | Y6.4kv6 cDNA |
| CIN5                                        | 9        | 5.86465      | 0.043   | 0.82                          | <i>S. kudriavzevii</i> | Y6.4kv6 cDNA |
| RPN4                                        | 2        | 14.9538      | 0.029   | 1.45                          | <i>S. kudriavzevii</i> | Y6.4kv6 cDNA |
| MCM1                                        | 8        | 16.162       | 0.015   | 1.00                          | <i>S. kudriavzevii</i> | Y6.4kv6 cDNA |
| MATALPHA2                                   | 2        | 7.19348      | 0.042   | 0.77                          | <i>S. kudriavzevii</i> | Y6.4kv6 cDNA |
| ABF1                                        | 6        | 1.27823      | 0.035   | 1.16                          | <i>S. kudriavzevii</i> | Y6.4kv6 cDNA |
