# Supplementary material for: Contribution of Transcription Factor Binding Site Motif Variants to Condition-Specific Gene Expression Patterns in Budding Yeast
Source: PLOS journal article supplement (doi:10.1371/journal.pone.0032274), 2012-02-23
Supplement: S7 (10.1371/journal.pone.0032274.s007) [file journal.pone.0032274.s007]

**Table S2.** Transcription factor binding motif positions identified with functionally variant ( $p < 0.05$ ) positions in both targets with single primary inputs and multiple primary inputs (for Affymetrix data only).

| Tf   | position | Score (F) | pvalue |
|------|----------|-----------|--------|
| SUM1 | 8        | 37.7401   | 0      |
| SUM1 | 7        | 25.6358   | 0.002  |
| ABF1 | 8        | 7.54051   | 0.023  |
