# Supplementary material for: Contribution of Transcription Factor Binding Site Motif Variants to Condition-Specific Gene Expression Patterns in Budding Yeast
Source: PLOS journal article supplement (doi:10.1371/journal.pone.0032274), 2012-02-23
Supplement: S8 (10.1371/journal.pone.0032274.s008) [file journal.pone.0032274.s008.pdf › journal.pone.0032274.s008.pdf]

**Table S3. Condition specificity of functional TF binding site variants.**

Significance of segregation of experimental conditions dependent upon upregulation of the major base or minor base. Cases are shown where the position has a functional heterogeneity and where there is clustering of similar experimental conditions when the experiments are sorted according to the difference in regulation of each-variant's target set.

| Transcription<br>Factor Binding Site<br>Family | Position | p-value of<br>condition<br>specificity | Variant 1 | Variant 2 | Platform       | Species              |
|------------------------------------------------|----------|----------------------------------------|-----------|-----------|----------------|----------------------|
| GCN4                                           | 1        | 0.0018                                 | G         | T         | Y6.4kv6 cDNA   | <i>S. cerevisiae</i> |
| HSF1                                           | 7        | 0                                      | G         | T         | Y6.4kv6 cDNA   | <i>S. cerevisiae</i> |
| MATalpha2                                      | 9        | 0.0001                                 | G         | A         | Y6.4kv6 cDNA   | <i>S. cerevisiae</i> |
| NRG1                                           | 2        | 0                                      | G         | A         | Y6.4kv6 cDNA   | <i>S. cerevisiae</i> |
| PAC                                            | 5        | 0.003                                  | A         | C         | Y6.4kv6 cDNA   | <i>S. cerevisiae</i> |
| RAP1                                           | 7        | 0.0002                                 | A         | G         | Y6.4kv6 cDNA   | <i>S. cerevisiae</i> |
| RAP1                                           | 7        | 0                                      | A         | T         | Y6.4kv6 cDNA   | <i>S. cerevisiae</i> |
| RAP1                                           | 10       | 0                                      | T         | C         | Y6.4kv6 cDNA   | <i>S. cerevisiae</i> |
| REB1                                           | 9        | 0                                      | A         | G         | Y6.4kv6 cDNA   | <i>S. cerevisiae</i> |
| RPN4                                           | 10       | 0                                      | A         | C         | Y6.4kv6 cDNA   | <i>S. cerevisiae</i> |
| RPN4                                           | 10       | 0                                      | A         | T         | Y6.4kv6 cDNA   | <i>S. cerevisiae</i> |
| RPN4                                           | 10       | 0                                      | C         | T         | Y6.4kv6 cDNA   | <i>S. cerevisiae</i> |
| SPT15                                          | 2        | 0.0087                                 | A         | C         | Y6.4kv6 cDNA   | <i>S. cerevisiae</i> |
| SPT15                                          | 2        | 0                                      | A         | T         | Y6.4kv6 cDNA   | <i>S. cerevisiae</i> |
| STB5                                           | 1        | 0                                      | A         | T         | Y6.4kv6 cDNA   | <i>S. cerevisiae</i> |
| THI2                                           | 3        | 0                                      | A         | C         | Y6.4kv6 cDNA   | <i>S. cerevisiae</i> |
| THI2                                           | 9        | 0                                      | A         | T         | Y6.4kv6 cDNA   | <i>S. cerevisiae</i> |
| ABF1                                           | 8        | 0                                      | A         | G         | Affymetrix S98 | <i>S. cerevisiae</i> |
| ABF1                                           | 8        | 0                                      | A         | C         | Affymetrix S98 | <i>S. cerevisiae</i> |
| ABF1                                           | 8        | 0                                      | A         | T         | Affymetrix S98 | <i>S. cerevisiae</i> |
| ABF1                                           | 8        | 0                                      | C         | G         | Affymetrix S98 | <i>S. cerevisiae</i> |
| ABF1                                           | 8        | 0                                      | C         | T         | Affymetrix S98 | <i>S. cerevisiae</i> |
| ABF1                                           | 8        | 0                                      | G         | T         | Affymetrix S98 | <i>S. cerevisiae</i> |
| doublePAC                                      | 1        | 0                                      | T         | A         | Affymetrix S98 | <i>S. cerevisiae</i> |
| FKH2                                           | 1        | 0                                      | A         | T         | Affymetrix S98 | <i>S. cerevisiae</i> |
| FKH2                                           | 1        | 0                                      | C         | G         | Affymetrix S98 | <i>S. cerevisiae</i> |
| FKH2                                           | 1        | 0                                      | A         | C         | Affymetrix S98 | <i>S. cerevisiae</i> |
| FKH2                                           | 1        | 0                                      | C         | T         | Affymetrix S98 | <i>S. cerevisiae</i> |
| FKH2                                           | 1        | 0                                      | A         | G         | Affymetrix S98 | <i>S. cerevisiae</i> |
| FKH2                                           | 1        | 0                                      | G         | T         | Affymetrix S98 | <i>S. cerevisiae</i> |
| FKH2                                           | 6        | 0                                      | T         | C         | Affymetrix S98 | <i>S. cerevisiae</i> |
| MCM1                                           | 4        | 0                                      | A         | C         | Affymetrix S98 | <i>S. cerevisiae</i> |
| MCM1                                           | 4        | 0                                      | A         | T         | Affymetrix S98 | <i>S. cerevisiae</i> |
| MCM1                                           | 4        | 0                                      | C         | T         | Affymetrix S98 | <i>S. cerevisiae</i> |
| PAC                                            | 5        | 0                                      | C         | T         | Affymetrix S98 | <i>S. cerevisiae</i> |
| PAC                                            | 5        | 0                                      | A         | C         | Affymetrix S98 | <i>S. cerevisiae</i> |
| PAC                                            | 5        | 0                                      | A         | T         | Affymetrix S98 | <i>S. cerevisiae</i> |
| REB1                                           | 2        | 0                                      | C         | T         | Affymetrix S98 | <i>S. cerevisiae</i> |
| REB1                                           | 2        | 0                                      | C         | G         | Affymetrix S98 | <i>S. cerevisiae</i> |
| REB1                                           | 2        | 0                                      | A         | T         | Affymetrix S98 | <i>S. cerevisiae</i> |
| REB1                                           | 2        | 0                                      | A         | G         | Affymetrix S98 | <i>S. cerevisiae</i> |
| REB1                                           | 2        | 0                                      | A         | C         | Affymetrix S98 | <i>S. cerevisiae</i> |

| Transcription<br>Factor Binding Site<br>Family | Position | p-value of<br>condition<br>specificity | Variant 1 | Variant 2 | Platform       | Species                |
|------------------------------------------------|----------|----------------------------------------|-----------|-----------|----------------|------------------------|
| REB1                                           | 2        | 0                                      | G         | T         | Affymetrix S98 | <i>S. cerevisiae</i>   |
| RGT1                                           | 2        | 0                                      | T         | C         | Affymetrix S98 | <i>S. cerevisiae</i>   |
| ROX1                                           | 9        | 0                                      | T         | C         | Affymetrix S98 | <i>S. cerevisiae</i>   |
| RPN4                                           | 10       | 0                                      | A         | G         | Affymetrix S98 | <i>S. cerevisiae</i>   |
| RPN4                                           | 10       | 0                                      | C         | T         | Affymetrix S98 | <i>S. cerevisiae</i>   |
| RPN4                                           | 10       | 0                                      | A         | C         | Affymetrix S98 | <i>S. cerevisiae</i>   |
| RPN4                                           | 10       | 0                                      | C         | G         | Affymetrix S98 | <i>S. cerevisiae</i>   |
| RPN4                                           | 10       | 0                                      | G         | T         | Affymetrix S98 | <i>S. cerevisiae</i>   |
| RPN4                                           | 10       | 0                                      | A         | T         | Affymetrix S98 | <i>S. cerevisiae</i>   |
| STE12DIG1                                      | 7        | 0                                      | G         | T         | Affymetrix S98 | <i>S. cerevisiae</i>   |
| STE12DIG1                                      | 7        | 0                                      | A         | T         | Affymetrix S98 | <i>S. cerevisiae</i>   |
| STE12DIG1                                      | 7        | 0                                      | A         | G         | Affymetrix S98 | <i>S. cerevisiae</i>   |
| SUM1                                           | 7        | 0                                      | G         | C         | Affymetrix S98 | <i>S. cerevisiae</i>   |
| SUM1                                           | 8        | 0                                      | C         | T         | Affymetrix S98 | <i>S. cerevisiae</i>   |
| SUM1                                           | 8        | 0                                      | A         | C         | Affymetrix S98 | <i>S. cerevisiae</i>   |
| SUM1                                           | 8        | 0                                      | A         | T         | Affymetrix S98 | <i>S. cerevisiae</i>   |
| TEC1                                           | 4        | 0                                      | A         | G         | Affymetrix S98 | <i>S. cerevisiae</i>   |
| THI2                                           | 8        | 0                                      | G         | T         | Affymetrix S98 | <i>S. cerevisiae</i>   |
| THI2                                           | 8        | 0                                      | C         | T         | Affymetrix S98 | <i>S. cerevisiae</i>   |
| THI2                                           | 8        | 0                                      | C         | G         | Affymetrix S98 | <i>S. cerevisiae</i>   |
| THI2                                           | 10       | 0                                      | T         | A         | Affymetrix S98 | <i>S. cerevisiae</i>   |
| YOX1                                           | 5        | 0                                      | C         | G         | Affymetrix S98 | <i>S. cerevisiae</i>   |
| ABF1                                           | 6        | 0.0002                                 | C         | T         | Y6.4kv6 cDNA   | <i>S. kudriavzevii</i> |
| CIN5                                           | 9        | 0.0127                                 | C         | T         | Y6.4kv6 cDNA   | <i>S. kudriavzevii</i> |
| doublePAC                                      | 3        | 0.0018                                 | C         | T         | Y6.4kv6 cDNA   | <i>S. kudriavzevii</i> |
| doublePAC                                      | 7        | 0.0018                                 | T         | C         | Y6.4kv6 cDNA   | <i>S. kudriavzevii</i> |
| doublePAC                                      | 11       | 0.0171                                 | A         | T         | Y6.4kv6 cDNA   | <i>S. kudriavzevii</i> |
| FKH2                                           | 9        | 0.0026                                 | A         | G         | Y6.4kv6 cDNA   | <i>S. kudriavzevii</i> |
| HSF1                                           | 6        | 0                                      | A         | G         | Y6.4kv6 cDNA   | <i>S. kudriavzevii</i> |
| MCM1                                           | 8        | 0                                      | G         | A         | Y6.4kv6 cDNA   | <i>S. kudriavzevii</i> |
| PAC                                            | 12       | 0                                      | C         | G         | Y6.4kv6 cDNA   | <i>S. kudriavzevii</i> |
| PAC                                            | 12       | 0.0006                                 | A         | G         | Y6.4kv6 cDNA   | <i>S. kudriavzevii</i> |
| PAC                                            | 12       | 0.0151                                 | A         | C         | Y6.4kv6 cDNA   | <i>S. kudriavzevii</i> |
| RAP1                                           | 10       | 0                                      | C         | T         | Y6.4kv6 cDNA   | <i>S. kudriavzevii</i> |
| RPN4                                           | 2        | 0.0012                                 | G         | A         | Y6.4kv6 cDNA   | <i>S. kudriavzevii</i> |
| SPT15                                          | 1        | 0.0011                                 | C         | T         | Y6.4kv6 cDNA   | <i>S. kudriavzevii</i> |
| SPT15                                          | 1        | 0                                      | A         | C         | Y6.4kv6 cDNA   | <i>S. kudriavzevii</i> |
| SPT15                                          | 1        | 0                                      | A         | T         | Y6.4kv6 cDNA   | <i>S. kudriavzevii</i> |
| doublePAC                                      | 11       | 0                                      | A         | T         | Y6.4kv6 cDNA   | <i>S. mikatae</i>      |
| MBP1                                           | 1        | 0.0222                                 | A         | T         | Y6.4kv6 cDNA   | <i>S. mikatae</i>      |
| MCM1                                           | 6        | 0.0001                                 | T         | G         | Y6.4kv6 cDNA   | <i>S. mikatae</i>      |
| PAC                                            | 6        | 0.0017                                 | A         | G         | Y6.4kv6 cDNA   | <i>S. mikatae</i>      |
| RAP1                                           | 10       | 0.0006                                 | T         | C         | Y6.4kv6 cDNA   | <i>S. mikatae</i>      |
| RCS1                                           | 8        | 0.031                                  | A         | T         | Y6.4kv6 cDNA   | <i>S. mikatae</i>      |
| REB1                                           | 9        | 0.0041                                 | A         | G         | Y6.4kv6 cDNA   | <i>S. mikatae</i>      |
| SPT15                                          | 2        | 0.0199                                 | C         | T         | Y6.4kv6 cDNA   | <i>S. mikatae</i>      |
| SPT15                                          | 2        | 0.0076                                 | A         | C         | Y6.4kv6 cDNA   | <i>S. mikatae</i>      |
| SWI4                                           | 2        | 0                                      | A         | T         | Y6.4kv6 cDNA   | <i>S. mikatae</i>      |
| SWI4                                           | 2        | 0.0001                                 | C         | T         | Y6.4kv6 cDNA   | <i>S. mikatae</i>      |
| SWI4                                           | 6        | 0.0096                                 | G         | C         | Y6.4kv6 cDNA   | <i>S. mikatae</i>      |

| Transcription<br>Factor Binding Site<br>Family | Position | p-value of<br>condition<br>specificity | Variant 1 | Variant 2 | Platform     | Species             |
|------------------------------------------------|----------|----------------------------------------|-----------|-----------|--------------|---------------------|
| ABF1                                           | 9        | 0.0338                                 | C         | G         | Y6.4kv6 cDNA | <i>S. paradoxus</i> |
| ABF1                                           | 9        | 0.0018                                 | C         | T         | Y6.4kv6 cDNA | <i>S. paradoxus</i> |
| ABF1                                           | 9        | 0                                      | A         | C         | Y6.4kv6 cDNA | <i>S. paradoxus</i> |
| ABF1                                           | 15       | 0.0017                                 | A         | G         | Y6.4kv6 cDNA | <i>S. paradoxus</i> |
| ABF1                                           | 15       | 0.0035                                 | G         | T         | Y6.4kv6 cDNA | <i>S. paradoxus</i> |
| doublePAC                                      | 11       | 0                                      | A         | T         | Y6.4kv6 cDNA | <i>S. paradoxus</i> |
| doublePAC                                      | 13       | 0                                      | C         | T         | Y6.4kv6 cDNA | <i>S. paradoxus</i> |
| RAP1                                           | 9        | 0                                      | A         | C         | Y6.4kv6 cDNA | <i>S. paradoxus</i> |
| REB1                                           | 9        | 0                                      | A         | G         | Y6.4kv6 cDNA | <i>S. paradoxus</i> |
| RPN4                                           | 10       | 0                                      | A         | T         | Y6.4kv6 cDNA | <i>S. paradoxus</i> |
| STB5                                           | 1        | 0                                      | C         | T         | Y6.4kv6 cDNA | <i>S. paradoxus</i> |
