# Supplementary material for: Contribution of Transcription Factor Binding Site Motif Variants to Condition-Specific Gene Expression Patterns in Budding Yeast
Source: PLOS journal article supplement (doi:10.1371/journal.pone.0032274), 2012-02-23
Supplement: S9 (10.1371/journal.pone.0032274.s009) [file journal.pone.0032274.s009.pdf › journal.pone.0032274.s009.pdf]

**Table S4. Gene ontology enrichment among genes with alternative variants at functionally variant transcription factor binding site positions.**

| <b>Transcription Factor Binding Site Family</b> | <b>Position</b> | <b>Variant</b> | <b>Gene Ontology Process</b>                   | <b>p-value of enrichment</b> |
|-------------------------------------------------|-----------------|----------------|------------------------------------------------|------------------------------|
| PAC                                             | 5               | C              | RNA metabolism                                 | 0                            |
| RPN4                                            | 10              | A              | protein catabolism                             | 0                            |
| SUM1                                            | 7               | C              | sporulation                                    | 1E-5                         |
| STE12DIG1                                       | 7               | A              | morphogenesis                                  | 0.00013                      |
| THI2                                            | 10              | T              | vitamin metabolism                             | 0.00023                      |
| DOUBLEPAC                                       | 1               | A              | ribosome biogenesis and assembly               | 0.00037                      |
| SUM1                                            | 8               | A              | sporulation                                    | 0.00053                      |
| FKH2                                            | 1               | T              | DNA metabolism                                 | 0.00155                      |
| STE12DIG1                                       | 7               | G              | vesicle-mediated transport                     | 0.00282                      |
| REB1                                            | 2               | G              | cell budding                                   | 0.00307                      |
| ABF1                                            | 8               | T              | ribosome biogenesis and assembly               | 0.00388                      |
| MCM1                                            | 4               | A              | protein modification                           | 0.00444                      |
| MCM1                                            | 4               | C              | cell wall organization and biogenesis          | 0.00445                      |
| FKH2                                            | 6               | T              | DNA metabolism                                 | 0.00744                      |
| SUM1                                            | 7               | G              | protein biosynthesis                           | 0.00831                      |
| MCM1                                            | 4               | G              | generation of precursor metabolites and energy | 0.0087                       |
| THI2                                            | 8               | C              | vitamin metabolism                             | 0.01041                      |
| RPN4                                            | 10              | T              | protein catabolism                             | 0.01452                      |
| THI2                                            | 8               | T              | vitamin metabolism                             | 0.01536                      |
| TEC1                                            | 4               | G              | morphogenesis                                  | 0.01574                      |
| MCM1                                            | 4               | T              | DNA metabolism                                 | 0.01644                      |
| PAC                                             | 5               | C              | ribosome biogenesis and assembly               | 0.01646                      |
| PAC                                             | 5               | A              | transcription                                  | 0.01805                      |
| STE12DIG1                                       | 7               | G              | conjugation                                    | 0.02015                      |
| THI2                                            | 8               | G              | vitamin metabolism                             | 0.02092                      |
| REB1                                            | 2               | A              | vesicle-mediated transport                     | 0.02153                      |
| RPN4                                            | 10              | T              | biological_process unknown                     | 0.0219                       |
| ABF1                                            | 8               | T              | pseudohyphal growth                            | 0.02242                      |
| THI2                                            | 8               | A              | organelle organization and biogenesis          | 0.02318                      |
| THI2                                            | 10              | A              | vitamin metabolism                             | 0.02538                      |
| RGT1                                            | 2               | T              | response to stress                             | 0.03126                      |
| RPN4                                            | 10              | G              | cytoskeleton organization and biogenesis       | 0.03235                      |
| RGT1                                            | 2               | C              | carbohydrate metabolism                        | 0.03692                      |
| THI2                                            | 8               | G              | cell homeostasis                               | 0.04004                      |
| MCM1                                            | 4               | T              | pseudohyphal growth                            | 0.04057                      |
| SUM1                                            | 8               | T              | protein biosynthesis                           | 0.04081                      |
| FKH2                                            | 6               | T              | protein biosynthesis                           | 0.0479                       |
| THI2                                            | 10              | A              | cell homeostasis                               | 0.04923                      |
| ABF1                                            | 8               | T              | organelle organization and biogenesis          | 0.0496                       |
