# Supplementary material for: Contribution of Transcription Factor Binding Site Motif Variants to Condition-Specific Gene Expression Patterns in Budding Yeast
Source: PLOS journal article supplement (doi:10.1371/journal.pone.0032274), 2012-02-23
Supplement: S10 (10.1371/journal.pone.0032274.s010) [file journal.pone.0032274.s010.pdf › journal.pone.0032274.s010.pdf]

**Table S5. Secondary transcription factor binding sites correlated with variants at nearby functionally variant binding sites.** Secondary sites have a posterior probability of <0.7 and >0.2. Significant coincidence of secondary binding sites for each other TF with each nucleotide at each functional variant position is given according to Fisher's exact test at a level of 0.01.

| Species                | Platform       | Transcription<br>Factor<br>Binding Site<br>Family | Position | Variant | Correlated<br>binding<br>site | p value  |
|------------------------|----------------|---------------------------------------------------|----------|---------|-------------------------------|----------|
| <i>S. cerevisiae</i>   | Affymetrix S98 | FKH2                                              | 1        | C       | GLN3*                         | 0.0023   |
| <i>S. cerevisiae</i>   | Affymetrix S98 | FKH2                                              | 1        | C       | GZF3                          | 0.0068   |
| <i>S. cerevisiae</i>   | Affymetrix S98 | FKH2                                              | 6        | C       | GLN3*                         | 0.004    |
| <i>S. cerevisiae</i>   | Affymetrix S98 | MCM1                                              | 4        | G       | MSN2                          | 0.0077   |
| <i>S. cerevisiae</i>   | Affymetrix S98 | REB1                                              | 2        | G       | PHO4                          | 0.0051   |
| <i>S. cerevisiae</i>   | Affymetrix S98 | REB1                                              | 2        | G       | YDR026c <sup>‡</sup>          | 0.0029   |
| <i>S. cerevisiae</i>   | Affymetrix S98 | REB1                                              | 2        | G       | RDS1                          | 0.0051   |
| <i>S. cerevisiae</i>   | Affymetrix S98 | REB1                                              | 2        | C       | SWI5                          | 0.0066   |
| <i>S. cerevisiae</i>   | Affymetrix S98 | REB1                                              | 2        | C       | YDR026c <sup>‡</sup>          | 9.50E-05 |
| <i>S. cerevisiae</i>   | Y6.4kv6 cDNA   | RAP1                                              | 7        | T       | RDS1                          | 0.0096   |
| <i>S. cerevisiae</i>   | Y6.4kv6 cDNA   | REB1                                              | 9        | G       | MSN2                          | 0.0096   |
| <i>S. paradoxus</i>    | Y6.4kv6 cDNA   | FKH2                                              | 6        | C       | GLN3                          | 0.0075   |
| <i>S. paradoxus</i>    | Y6.4kv6 cDNA   | RAP1                                              | 9        | G       | MSN2                          | 0.002    |
| <i>S. paradoxus</i>    | Y6.4kv6 cDNA   | RAP1                                              | 9        | G       | REB1                          | 0.002    |
| <i>S. paradoxus</i>    | Y6.4kv6 cDNA   | REB1                                              | 9        | G       | MSN2                          | 0.0041   |
| <i>S. mikatae</i>      | Y6.4kv6 cDNA   | REB1                                              | 9        | A       | MSN2                          | 0.009    |
| <i>S. mikatae</i>      | Y6.4kv6 cDNA   | REB1                                              | 9        | G       | MSN2                          | 0.009    |
| <i>S. mikatae</i>      | Y6.4kv6 cDNA   | SPT15                                             | 2        | A       | ROX1                          | 0.0098   |
| <i>S. mikatae</i>      | Y6.4kv6 cDNA   | SPT15                                             | 2        | T       | ROX1                          | 0.0063   |
| <i>S. mikatae</i>      | Y6.4kv6 cDNA   | SWI4                                              | 2        | T       | RFX1                          | 0.0049   |
| <i>S. mikatae</i>      | Y6.4kv6 cDNA   | SWI4                                              | 2        | A       | STE12mot1                     | 0.0088   |
| <i>S. kudriavzevii</i> | Y6.4kv6 cDNA   | FKH2                                              | 9        | G       | NRG1                          | 0.0072   |
| <i>S. kudriavzevii</i> | Y6.4kv6 cDNA   | RPN4                                              | 2        | A       | MATalpha2                     | 0.0056   |

\*The Gln3 binding site overlaps with the Fkh2 binding site.

<sup>‡</sup> The YDR026c binding site overlaps with the Reb1 binding site.
